# Supplementary material for: Deciphering the protein digestion of meat products for the elderly by in vitro food oral processing and gastric dynamic digestion, peptidome analysis and modeling
Source: Royal Society of Chemistry journal article supplement (doi:10.1039/d1fo00969a), 2021-01-01
Supplement: d1fo00969a1.pdf [file d1fo00969a1.pdf]

## AM<sup>2</sup> masticator apparatus

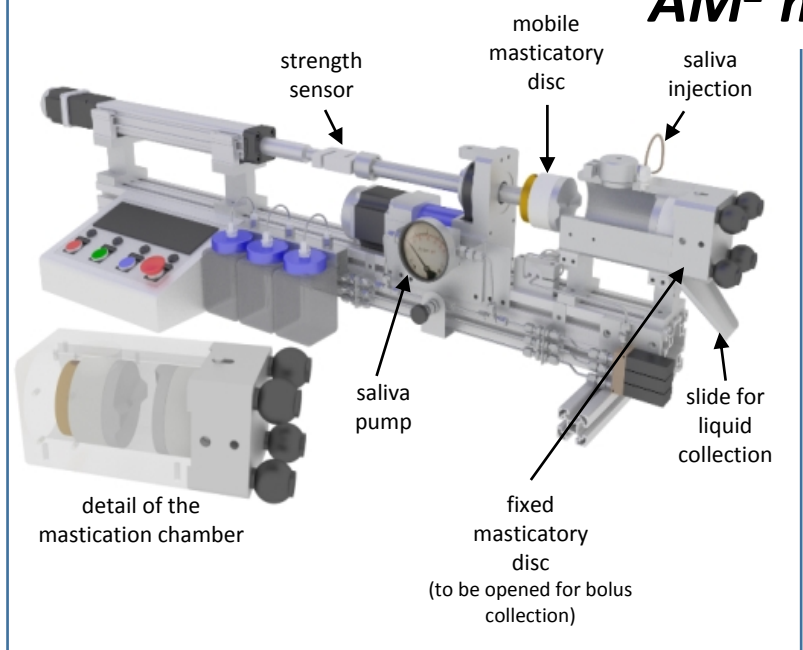

## Dynamic digester DIDGI

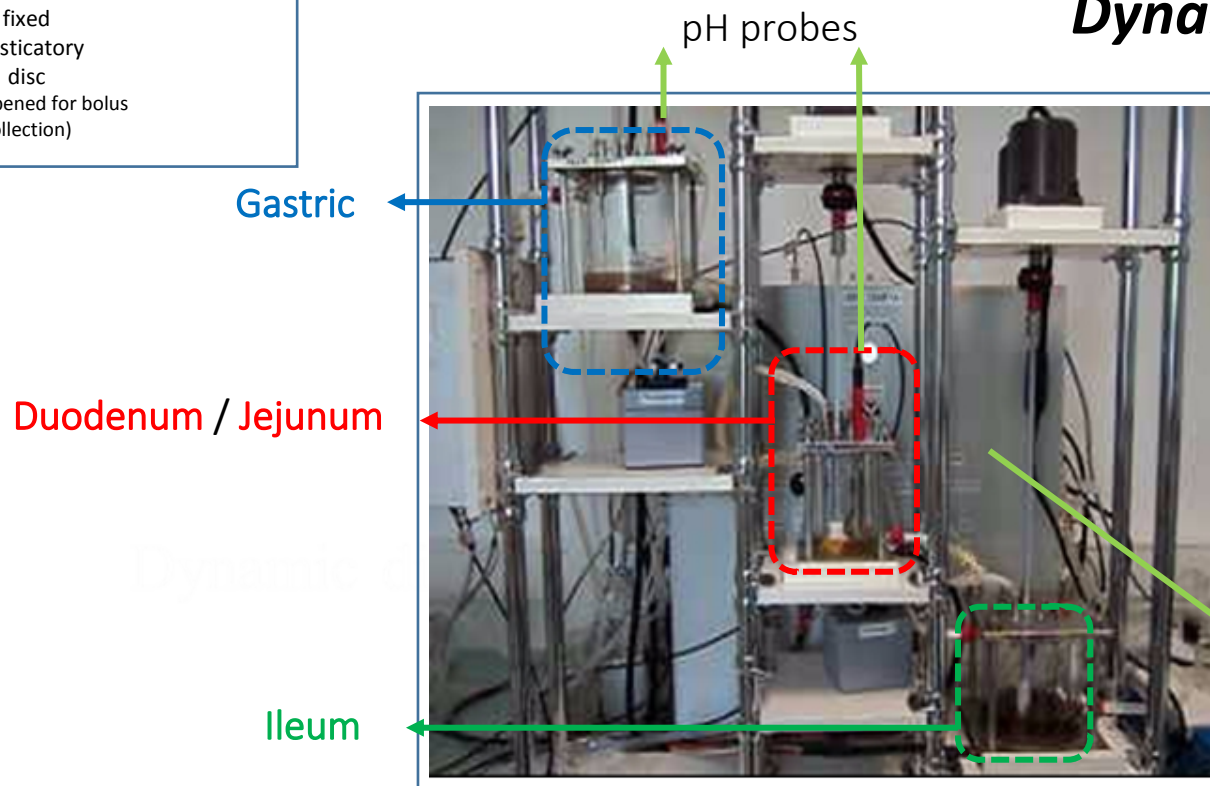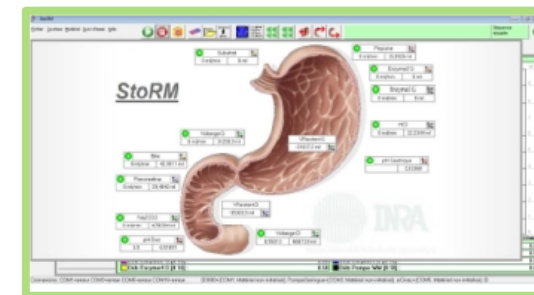

Control system - Software : **STORM**<sup>®</sup>  
**STO**mach **R**egulation and **M**onitoring
