# Supplementary material for: Deciphering the protein digestion of meat products for the elderly by in vitro food oral processing and gastric dynamic digestion, peptidome analysis and modeling
Source: Royal Society of Chemistry journal article supplement (doi:10.1039/d1fo00969a), 2021-01-01
Supplement: d1fo00969a2.xlsx [file d1fo00969a2.xlsx]

## Sheet: Table_peptide
MLC1f OS=Sus scrofa GN=MYL1 PE=1 SV=1
Accession	peptide sequence	Start_pos	end_pos	progenesis peptide number	Retention time (min)	Charge	m/z	Measured mass	Mass error (ppm)	Score	Modifications	Use in quantitation
A1XQT6	IKIEFSKEQQDE	41	52	5093	17.5201	2	747.377	1492.74	-0.839414	27.71		True
A1XQT6	SQVGDVLRALGTNPTNA	71	87	9034	31.5106	2	856.95	1711.88	-0.488937	19.82		True
A1XQT6	RALGTNPTNAEVKKVLGNPSNE	78	99	1274	18.5099	3	770.41	2308.21	-2.30209	25.76		True
A1XQT6	RALGTNPTNAEVKKVLGNPSNEEMNAKKIE	78	107	4346	19.1389	5	651.345	3251.69	-0.610374	113.88		True
A1XQT6	RALGTNPTNAEVKKVLGNPSNEEMNAKKIEF	78	108	3336	22.8148	5	680.759	3398.76	-1.02121	127.66		True
A1XQT6	RALGTNPTNAEVKKVLGNPSNEEMNAKKIEF	78	108	11347	22.8381	4	850.948	3399.76	4.71517	22.67	[9] Deamidated (NQ)	True
A1XQT6	EVKKVLGNPSNE	88	99	10337	11.6879	2	657.356	1312.7	-0.928792	13.15		True
A1XQT6	EVKKVLGNPSNEEM	88	101	2518	15.2259	2	787.397	1572.78	-1.87987	34.96		True
A1XQT6	EVKKVLGNPSNEEMNAKKIE	88	107	7994	14.3589	4	565.052	2256.18	-0.310758	79.43		True
A1XQT6	EVKKVLGNPSNEEMNAKKIEF	88	108	2587	19.2558	3	802.089	2403.24	-1.05331	123.79		True
A1XQT6	VKKVLGNPSNEEM	89	101	8557	13.4354	2	722.876	1443.74	-1.43044	15.99		True
A1XQT6	VKKVLGNPSNEEMNAKKIEF	89	108	3408	17.8812	3	759.074	2274.2	-1.44249	136.9		True
A1XQT6	EMNAKKIEF	100	108	2047	17.1784	2	555.286	1108.56	-1.58135	42.94		True
A1XQT6	NAKKIEF	102	108	5089	12.6416	2	425.244	848.474	-1.71838	15.9		False
A1XQT6	QAISNNKDQGSYEDF	116	130	228	18.9439	2	858.378	1714.74	-0.894776	27.15		True
A1XQT6	ISNNKDQGSYEDF	118	130	2658	17.9225	2	758.83	1515.65	-1.52136	18.47		True
A1XQT6	GAELRHVL	147	154	1713	14.6011	3	298.843	893.506	-2.46293	18.34		False
A1XQT6	ATLGEKMKEEEVE	155	167	1044	15.5417	2	746.862	1491.71	-1.62145	13.02		True
Tropomyosin alpha-3 chain OS=Sus scrofa GN=TPM3 PE=2 SV=1
Accession	peptide sequence	Start_pos	end_pos	progenesis peptide number	Retention time (min)	Charge	m/z	Measured mass	Mass error (ppm)	Score	Modifications	Use in quantitation
A1XQV4	LKLDKENALDRAEQAEAEQKQAEERSKQLEDEL	11	43	9171	24.9875	5	771.792	3853.93	-1.03835	26.63		True
A1XQV4	DKENALDRAEQAEAEQKQAEERSKQLEDEL	14	43	9685	24.4107	4	875.924	3499.67	0.672494	61.34		True
A1XQV4	DRAEQAEAEQKQAEERSKQLEDEL	20	43	7395	22.4418	4	708.341	2829.34	-0.796977	26.35		True
A1XQV4	DKYSEALKDAQEKLEL	58	73	3055	28.1955	3	627.327	1878.96	1.5702	27.72		False
A1XQV4	VEEELDRAQERL	95	106	345	17.5421	3	496.254	1485.74	-1.36036	51.33		False
A1XQV4	VEEELDRAQERLATAL	95	110	10888	25.8008	2	921.98	1841.95	-1.38288	41.44		False
A1XQV4	EELDRAQERL	97	106	8854	14.5698	3	420.217	1257.63	-1.95004	29.23		False
A1XQV4	ELDRAQERL	98	106	9815	13.0384	3	377.203	1128.59	-1.41788	18.99		False
A1XQV4	ATALQKLEEAEKAADESERGMKVIE	107	131	3506	27.2479	5	550.084	2745.38	-0.703147	169.74		False
A1XQV4	QKLEEAEKAADESERGMKVIE	111	131	8722	19.5328	3	797.401	2389.18	0.688109	64.52		False
A1XQV4	AEKAADESERGMKVIE	116	131	10562	13.6948	2	881.934	1761.85	-2.34151	52.55		False
A1XQV4	IQLKEAKHIAE	146	156	8345	12.5555	3	427.25	1278.73	-1.93471	60.48		False
A1XQV4	IKILTDKL	225	232	3708	20.2876	3	315.211	942.61	-1.61847	15.18		False
A1XQV4	AERSVAKLEKTIDDL	242	256	3076	22.3768	3	563.312	1686.91	-0.66256	15.8		False
A1XQV4	YAQKLKYKAISE	261	272	8986	13.0035	2	721.405	1440.8	-1.09813	75.54		False
Fast skeletal muscle troponin C OS=Sus scrofa GN=TNNC2 PE=1 SV=2
Accession	peptide sequence	Start_pos	end_pos	progenesis peptide number	Retention time (min)	Charge	m/z	Measured mass	Mass error (ppm)	Score	Modifications	Use in quantitation
A1XQV5	DMFDADGGGDISVKELGT	25	42	10863	31.4511	2	913.909	1825.8	-0.0524454	51.37		True
A1XQV5	DMFDADGGGDISVKELGTVM	25	44	9577	37.0949	2	1028.96	2055.91	-0.409041	41.47		True
A1XQV5	FDADGGGDISVKELGT	27	42	5881	25.2953	2	790.875	1579.74	-0.590708	41.58		True
A1XQV5	FDADGGGDISVKELGTVM	27	44	3009	31.7375	2	905.929	1809.84	-0.994556	49.4		True
A1XQV5	DADGGGDISVKELGT	28	42	3369	22.7105	2	717.34	1432.67	-2.04111	26.71		True
A1XQV5	DADGGGDISVKELGTV	28	43	6617	26.6893	2	766.878	1531.74	2.51443	21.41		True
A1XQV5	DADGGGDISVKELGTVM	28	44	589	30.6084	2	832.395	1662.78	-0.971502	23.27		True
A1XQV5	DADGGGDISVKELGTVMRM	28	46	6287	31.3912	3	650.98	1949.92	-0.284909	177.41		True
A1XQV5	ESLMKDGDKNNDGRIDF	133	149	498	19.2102	4	489.229	1952.89	-0.716889	102.07		True
A1XQV5	ESLMKDGDKNNDGRIDFDE	133	151	5453	19.1644	3	733.326	2196.96	-1.16834	73.96		True
A1XQV5	MKDGDKNNDGRIDF	136	149	7224	13.9676	2	812.871	1623.73	-1.69342	52.01		True
A1XQV5	LKMMEGVQ	153	160	7780	17.9782	1	935.467	934.46	-1.69748	17.99		False
Serotransferrin OS=Sus scrofa GN=TF PE=1 SV=1
Accession	peptide sequence	Start_pos	end_pos	progenesis peptide number	Retention time (min)	Charge	m/z	Measured mass	Mass error (ppm)	Score	Modifications	Use in quantitation
B3CL06	VFEAGLAPYNLKPVV	85	99	3034	31.9778	2	808.955	1615.9	-0.891079	15.67		False
B3CL06	VFEAGLAPYNLKPVVAE	85	101	4530	31.2271	2	908.995	1815.98	-0.461767	79.02		False
B3CL06	EAGLAPYNLKPVVAE	87	101	6887	27.0843	2	785.927	1569.84	-0.719721	33.12		False
B3CL06	YDQLPEPRKPIE	154	165	3474	17.718	3	495.596	1483.76	-1.49715	13.92		True
B3CL06	YDQLPEPRKPIEKAVASF	154	171	10269	23.3712	3	696.709	2087.1	-0.159145	44.34		True
B3CL06	QLFSSSHGKDLL	306	317	6765	21.5348	3	444.57	1330.69	-0.713343	19.77		False
B3CL06	FSSSHGKDLL	308	317	2181	14.8455	3	364.188	1089.54	-2.67841	27.26		False
B3CL06	VKDQVVQQNTDGKNKDDWAKDLKQMD	561	586	2975	18.0896	5	610.102	3045.48	-2.37669	55.95		True
Phosphoglycerate mutase 2 OS=Sus scrofa GN=PGAM2 PE=1 SV=1
Accession	peptide sequence	Start_pos	end_pos	progenesis peptide number	Retention time (min)	Charge	m/z	Measured mass	Mass error (ppm)	Score	Modifications	Use in quantitation
B5KJG2	SEKGAEEAKRGAHAIKDAKMEF	31	52	6777	14.87	4	601.556	2402.2	-2.35313	32.53		True
B5KJG2	DGTDQMWLPVVRT	72	84	5479	33.4479	2	759.376	1516.74	2.27257	62.55		True
B5KJG2	EIAPQIKAGKRVL	170	182	2734	16.0962	3	474.964	1421.87	-1.26913	61.63		True
B5KJG2	IAPQIKAGKRVL	171	182	8274	13.9522	3	431.95	1292.83	-1.71408	53.52		True
B5KJG2	LDQALKPTKPMRF	220	232	3960	17.6046	3	515.625	1543.85	-1.27107	68.74		True
B5KJG2	LDQALKPTKPMRFLGDEE	220	237	5215	22.1064	3	696.698	2087.07	-0.569986	49.45		True
B5KJG2	DQALKPTKPMRF	221	232	2662	16.1367	4	358.699	1430.77	-2.19357	37.76		True
Triosephosphate isomerase OS=Sus scrofa GN=TPI1 PE=1 SV=1
Accession	peptide sequence	Start_pos	end_pos	progenesis peptide number	Retention time (min)	Charge	m/z	Measured mass	Mass error (ppm)	Score	Modifications	Use in quantitation
D0G7F6	APARKFFVGGN	2	12	3380	15.5812	2	582.319	1162.62	-1.41787	24.25		False
D0G7F6	INTLNAAKLPADTE	26	39	9157	21.3363	2	735.893	1469.77	-0.683361	89.71		False
D0G7F6	TGEISPGMIKDLGAT	76	90	2515	27.1391	2	745.381	1488.75	-1.64999	14.37		True
D0G7F6	TGEISPGMIKDLGATW	76	91	1169	33.5804	2	838.421	1674.83	-0.427206	29.99		True
D0G7F6	IGQKVAHALAEGL	110	122	5749	20.552	2	653.877	1305.74	-0.697214	25.67		False
D0G7F6	IGEKLDEREAGITE	128	141	2686	17.6046	2	780.398	1558.78	-1.94939	27.79		False
D0G7F6	AIGTGKTATPQQAQEVHEKLRG	170	191	6316	13.6948	4	580.813	2319.22	-2.69228	134.83		False
D0G7F6	VAQSTRIIYGGSVTGATCKE	201	220	2095	18.7939	3	681.017	2040.03	-0.705007	159.64		True
D0G7F6	FLVGGASLKPE	230	240	3244	23.7919	2	559.316	1116.62	0.0407077	32.81		True
D0G7F6	FLVGGASLKPEF	230	241	1099	30.3036	2	632.85	1263.69	-0.897103	42.29		True
D0G7F6	LVGGASLKPEF	231	231	453	24.3207	2	559.317	1116.62	1.44593	27.98		True
D0G7F6	VGGASLKPEF	232	241	352	21.0173	2	502.774	1003.53	-0.771712	46.47		True
D0G7F6	VDIINAK	242	248	209	15.5417	2	386.731	771.447	-2.30911	25.68		False
Superoxide dismutase [Cu-Zn] OS=Sus scrofa GN=SOD1 PE=1 SV=1
Accession	peptide sequence	Start_pos	end_pos	progenesis peptide number	Retention time (min)	Charge	m/z	Measured mass	Mass error (ppm)	Score	Modifications	Use in quantitation
D9D839	SVIALSGDHSIIGRT	102	116	9923	22.8857	3	509.283	1524.83	0.663487	142.23		True
D9D839	IALSGDHSIIGRT	104	116	6362	19.489	3	447.249	1338.72	-0.773438	143.66		True
Calcium-transporting ATPase OS=Sus scrofa GN=ATP2A1 PE=1 SV=1
Accession	peptide sequence	Start_pos	end_pos	progenesis peptide number	Retention time (min)	Charge	m/z	Measured mass	Mass error (ppm)	Score	Modifications	Use in quantitation
F1RFH9	ETTGLTPDQVKRHLEKYGHNEL	20	41	3983	22.0876	4	642.081	2564.3	-0.751838	99.07		True
F1RFH9	VAVGDKVPADIRI	153	165	1391	22.9301	3	451.601	1351.78	-1.20649	69.17		False
F1RFH9	LTIKSTTL	166	173	794	19.3961	2	438.773	875.532	-0.866904	13.87		True
F1RFH9	FSGTNIAAGKAIG	209	221	718	19.4383	2	603.827	1205.64	-0.929865	18.48		True
F1RFH9	TEIGKIRDQM	230	239	9081	16.1634	2	595.812	1189.61	-1.78311	13.59		False
F1RFH9	TEIGKIRDQMA	230	240	7600	16.3367	2	631.331	1260.65	-2.15674	14.06		False
F1RFH9	AATEQDKTPLQQKLDE	240	255	8781	16.2483	3	605.642	1813.9	-1.23234	72.28		True
F1RFH9	ATEQDKTPLQQKLDE	241	255	4208	16.0962	3	581.963	1742.87	-0.834664	49.15		True
F1RFH9	FSITGSTYAPEGEVLKNDKPVRAGQYDGL	382	410	3212	26.7608	4	778.894	3111.55	-1.3789	127.04		True
F1RFH9	KNDKPVRAGQYDGL	397	410	9241	12.8742	2	780.909	1559.8	-1.32676	25.81		True
F1RFH9	DFNEAKGVYEKVGEATE	426	442	9005	23.6816	2	943.443	1884.87	-1.20452	77.44		True
F1RFH9	NEAKGVYEKVGEATE	428	442	11412	15.2259	2	812.396	1622.78	-0.911997	63.7		False
F1RFH9	NTDVRNLSKVERANACN	456	472	5448	14.2492	3	635.317	1902.93	-1.62502	63.96		True
F1RFH9	YCSPAKSRAAVGNKM	497	511	11232	11.3854	3	528.265	1581.77	-0.78111	38.59		True
F1RFH9	IKEWGTGRDTLR	548	559	5468	13.9676	4	358.697	1430.76	-1.8506	58.31		True
F1RFH9	IKEWGTGRDTLRC	548	560	4653	16.3777	4	384.449	1533.77	-2.44893	41.76		True
F1RFH9	VLDDSARF	576	583	2821	19.1006	2	461.735	921.455	-0.717098	13.51		True
F1RFH9	VGVVGMLDPPRKEVTGS	593	609	4641	23.074	3	580.982	1739.92	-0.499811	46.89		True
F1RFH9	VGVVGMLDPPRKEVTGSIQ	593	611	3014	24.8684	3	661.362	1981.07	-0.719	53.26		True
F1RFH9	VGVVGMLDPPRKEVTGSIQL	593	612	5633	29.6715	3	699.057	2094.15	-0.255937	24.24		True
F1RFH9	FDDLPLPEQRE	657	667	3990	25.348	2	679.833	1357.65	-0.0153246	45.13		True
F1RFH9	FDDLPLPEQREA	657	668	3263	25.3758	2	715.352	1428.69	0.958697	46.77		True
F1RFH9	FDDLPLPEQREAC	657	669	7658	26.7814	2	766.853	1531.69	-4.64053	19.44		True
F1RFH9	FARVEPSHKSKIVE	675	688	10597	11.5255	3	542.97	1625.89	-1.04995	29.7		False
F1RFH9	YDEITAMTGDGVNDAPALKKAEIG	693	716	3758	27.0291	3	827.071	2478.19	-1.05863	119.98		True
F1RFH9	AMTGDGVNDAPALKKAEIG	698	716	3799	19.6714	2	929.471	1856.93	-1.1542	98.47		True
F1RFH9	MTGDGVNDAPALKKAEIG	699	716	1882	19.1006	3	596.304	1785.89	-1.57808	63.17		True
F1RFH9	TGDGVNDAPALKKAEIG	700	716	7396	17.698	3	552.623	1654.85	-2.48366	66.25		True
F1RFH9	AVEEGRAIYNNMKQ	745	758	4257	15.6298	3	541.603	1621.79	-1.46586	34.12		False
F1RFH9	VTDGLPATALGFNPPDL	797	813	2665	39.5602	2	849.44	1696.87	-0.636889	13.22		False
F1RFH9	VTDGLPATALGFNPPDLD	797	814	5321	38.5938	2	906.953	1811.89	-1.25571	18.83		False
Beta-enolase OS=Sus scrofa GN=ENO3 PE=1 SV=1
Accession	peptide sequence	Start_pos	end_pos	progenesis peptide number	Retention time (min)	Charge	m/z	Measured mass	Mass error (ppm)	Score	Modifications	Use in quantitation
F1RFY2	AREILDSRGNPTVE	8	21	2458	15.9057	2	778.904	1555.79	-1.39248	31.47		False
F1RFY2	REILDSRGNPTVE	9	21	2338	15.7382	2	743.385	1484.76	-1.53801	18.93		False
F1RFY2	VDLHTAKGRF	22	31	4982	13.3358	2	572.316	1142.62	-1.46431	40.2		False
F1RFY2	EALELRDGDKSRYLGKGVL	45	63	3489	20.9755	4	530.543	2118.14	-0.501831	44.72		False
F1RFY2	ALELRDGDKSRYLGKGVL	46	63	3035	20.2458	5	398.827	1989.1	-1.45881	39.4		False
F1RFY2	LELRDGDKSRYLGKGVL	47	63	1046	19.6477	4	480.523	1918.06	-0.676291	20.86		False
F1RFY2	ELRDGDKSRYLGKGVL	48	63	8710	16.577	2	903.497	1804.98	-0.577797	45.85		False
F1RFY2	KAVEHINKTLGPA	64	76	10369	11.7223	3	459.932	1376.78	-1.6077	69.97		False
F1RFY2	KAVEHINKTLGPAL	64	77	2522	15.5221	2	745.937	1489.86	-1.60237	51.62		False
F1RFY2	KAVEHINKTLGPALL	64	78	7062	19.5749	2	802.48	1602.95	-0.212602	24.95		False
F1RFY2	VEHINKTLGPAL	66	77	5253	18.0214	2	646.371	1290.73	-2.21872	45.85		False
F1RFY2	LEKKLSVVDQEKVDKF	78	93	8890	17.1169	2	953.038	1904.06	-0.318642	120.86		False
F1RFY2	LEKKLSVVDQEKVDKFM	78	94	4161	20.1941	4	509.782	2035.1	-1.2048	65.59		False
F1RFY2	EKKLSVVDQEKVDKF	79	93	10309	15.8812	2	896.496	1790.98	-0.0459154	96.23		False
F1RFY2	MIELDGTENKSKFGAN	94	109	231	19.7386	3	585.285	1752.83	-1.28688	90.44		False
F1RFY2	IELDGTENKSKFGAN	95	109	1326	16.9193	2	811.903	1621.79	-1.95604	106.59		False
F1RFY2	AVCKAGAAEKGVPL	117	130	10563	15.3552	2	657.364	1312.71	-2.59018	22.78		True
F1RFY2	AVCKAGAAEKGVPLYRHIAD	117	136	8445	15.9057	5	414.625	2068.09	-0.7764	24.83		False
F1RFY2	AGNPDLVLPVPAF	138	150	177	40.3519	2	655.361	1308.71	-0.663086	13.16		False
F1RFY2	AGNPDLVLPVPAFN	138	151	6878	38.1684	2	712.382	1422.75	-0.836464	15.02		False
F1RFY2	LVLPVPAF	143	150	8926	40.0316	1	855.534	854.527	-0.067636	13.89		False
F1RFY2	VLPVPAF	144	150	4451	33.816	1	742.449	741.442	-1.01695	16.19		True
F1RFY2	NVINGGSHAGNKL	151	163	8209	12.2099	2	640.839	1279.66	-0.624153	62.57		False
F1RFY2	NVINGGSHAGNKLAM	151	165	5721	15.5221	2	741.877	1481.74	-1.06282	38.58		False
F1RFY2	NVINGGSHAGNKLAMQ	151	166	6189	14.7118	3	537.606	1609.8	-1.91065	70.93		False
F1RFY2	NVINGGSHAGNKLAMQE	151	167	572	15.3552	3	580.62	1738.84	-1.59084	59.49		False
F1RFY2	NVINGGSHAGNKLAMQE	151	167	6422	15.3552	3	585.952	1754.83	-2.23004	48.36	[15] Oxidation (M)	False
F1RFY2	NVINGGSHAGNKLAMQEF	151	168	1394	21.0793	2	943.961	1885.91	-2.04046	60.71		False
F1RFY2	LKTAIQAAGYPDKVVIG	227	243	3713	23.2808	2	872.503	1742.99	-0.806753	17.04		False
F1RFY2	LKTAIQAAGYPDKVVIGM	227	244	3945	26.4455	2	938.023	1874.03	-0.666379	39.98		False
F1RFY2	LKTAIQAAGYPDKVVIGMD	227	245	2812	26.0799	2	995.536	1989.06	-1.22258	70.99		False
F1RFY2	KTAIQAAGYPDKVVIGMD	228	245	4326	24.1464	3	626.333	1875.98	-0.13765	14.28		False
F1RFY2	AIQAAGYPDKVVIGMD	230	245	2377	26.8928	2	824.424	1646.83	-0.625405	17.07		False
F1RFY2	FKSPDDPSRHITGEKL	261	276	9346	15.8005	3	609.65	1825.93	-1.97948	33.77		False
F1RFY2	FKSPDDPSRHITGEKLGE	261	278	1969	15.9452	4	504.01	2012.01	7.63232	15.53		False
F1RFY2	FKSPDDPSRHITGEKLGEL	261	279	3331	19.6714	2	1063.55	2125.08	-0.578218	58.49		False
F1RFY2	YKSFIKNYPVVS	280	291	246	21.0583	2	722.895	1443.77	-1.20912	13.43		False
F1RFY2	IEDPFDQDDWKT	292	303	2251	29.546	2	754.831	1507.65	0.314568	67.62		False
F1RFY2	IEDPFDQDDWKTWTS	292	306	8062	35.316	2	941.909	1881.8	-1.46444	56.73		False
F1RFY2	IEDPFDQDDWKTWTSF	292	307	4488	40.6516	2	1015.44	2028.87	-0.173637	63.58		False
F1RFY2	IQIVGDDLTVTNPKRIAQ	313	330	7989	24.3207	3	661.375	1981.1	9.69881	46.05	[2] Deamidated (NQ)	True
F1RFY2	LTVTNPKRIAQ	320	330	6015	13.6948	2	620.871	1239.73	-2.09133	43.37		True
F1RFY2	LTVTNPKRIAQA	320	331	9961	14.7118	2	656.39	1310.77	-1.00191	29.71		True
F1RFY2	LTVTNPKRIAQAVE	320	333	6904	19.3961	2	770.446	1538.88	-0.79808	38.33		True
F1RFY2	TVTNPKRIAQ	321	330	10615	10.3476	2	564.33	1126.64	-0.854368	27.29		True
F1RFY2	TVTNPKRIAQA	321	331	10539	11.2821	3	400.235	1197.68	-1.06607	31.77		True
F1RFY2	TVTNPKRIAQAVE	321	333	10238	15.3838	2	713.904	1425.79	-1.02589	17.49		True
F1RFY2	TVTNPKRIAQAVEKKACN	321	338	9784	15.8812	3	657.698	1970.07	-0.261065	47.7		True
F1RFY2	IEEALGDKAVF	413	423	4220	24.7553	2	596.316	1190.62	-0.699175	23.21		False
Myosin binding protein C, fast type OS=Sus scrofa GN=MYBPC2 PE=1 SV=2
Accession	peptide sequence	Start_pos	end_pos	progenesis peptide number	Retention time (min)	Charge	m/z	Measured mass	Mass error (ppm)	Score	Modifications	Use in quantitation
F1RH19	LKKPDSVSVENGKDAL	55	70	1621	15.5221	3	567.311	1698.91	-1.63561	25.4		True
F1RH19	LELGSKSGARF	94	104	9164	16.9765	2	582.821	1163.63	-1.76143	45.09		True
F1RH19	FTKKLDPAYQVDQGNKIKL	270	288	1750	19.7905	4	552.31	2205.21	-1.95808	27.03		True
F1RH19	ISDPDLPLKW	292	301	2342	31.101	2	592.321	1182.63	-0.153125	32.51		True
F1RH19	VVVVAGNKLRL	567	577	8803	21.0793	3	389.923	1166.75	-1.55057	81.43		True
F1RH19	VVVAGNKLRL	568	577	1850	18.7063	3	356.901	1067.68	-1.49492	51.69		False
F1RH19	DVSITGEPPPVATW	578	591	3951	35.7989	2	734.869	1467.72	-0.617706	16.47		True
F1RH19	PIAPTSEPQHL	779	789	2782	17.8394	2	595.313	1188.61	-2.771	36.53		True
F1RH19	PIAPTSEPQHLTVE	779	792	4669	20.5235	2	759.893	1517.77	-0.676405	21.49		True
F1RH19	TVKNLPTGARITF	843	855	1000	22.0167	3	473.277	1416.81	-0.57253	42.41		True
F1RH19	LSDSPGVSKNTARILKTGIT	1060	1079	5097	19.3535	4	515.294	2057.15	0.258747	24.65		True
F1RH19	FKLPEFKEHD	1080	1089	4193	20.6376	4	323.168	1288.64	-2.1462	35.61		True
F1RH19	IGEDPKF	1134	1140	1278	17.2811	2	403.207	804.4	-1.89677	15.69		True
Myotilin OS=Sus scrofa GN=MYOT PE=4 SV=1
Accession	peptide sequence	Start_pos	end_pos	progenesis peptide number	Retention time (min)	Charge	m/z	Measured mass	Mass error (ppm)	Score	Modifications	Use in quantitation
F1RH92	DFKVSGLPAPDVSW	271	284	8053	35.6089	2	759.385	1516.76	-0.728055	21.36		True
F1RH92	YLNGRPVQSDDL	285	296	4955	19.3016	2	688.842	1375.67	-2.84054	24.67		True
Actinin, alpha 2 OS=Sus scrofa GN=ACTN2 PE=1 SV=1
Accession	peptide sequence	Start_pos	end_pos	progenesis peptide number	Retention time (min)	Charge	m/z	Measured mass	Mass error (ppm)	Score	Modifications	Use in quantitation
F1RHL9	IQEEEWDRDLL	21	31	8244	29.5141	2	723.349	1444.68	-0.408307	23.09		True
F1RHL9	HKIANVNKALD	95	105	9821	11.0224	2	611.848	1221.68	-0.807667	15.79		False
F1RHL9	YIASKGVKL	106	114	7267	14.4829	2	489.802	977.589	-1.54091	35.23		True
F1RHL9	IASKGVKL	107	114	11151	11.9199	2	408.271	814.527	-1.13333	23.83		False
F1RHL9	IVDGNVKMTL	122	131	974	22.9533	2	545.302	1088.59	-0.581953	22.69		True
F1RHL9	IVDGNVKMTLGM	122	133	1873	26.0318	2	639.333	1276.65	-0.81692	37.27		True
F1RHL9	ISVEETSAKEGLL	146	158	2657	23.8598	2	688.365	1374.72	-5.6811	50.7		False
F1RHL9	ISVEETSAKEGLLL	146	159	4215	28.2816	2	744.911	1487.81	-0.171131	57.98		False
F1RHL9	EETSAKEGLLL	149	159	1938	23.5107	2	595.319	1188.62	-0.282812	13.14		False
F1RHL9	IAEKHLDIPKML	218	229	10128	22.311	3	469.939	1406.79	-1.04137	24.38		True
F1RHL9	IAEKHLDIPKMLDAED	218	233	10416	23.8844	2	919.471	1836.93	-0.680559	53.37		True
F1RHL9	IVNTPKPDERAIM	234	246	2971	18.0214	3	495.269	1482.78	-1.73293	62.94		True
F1RHL9	IVNTPKPDERAIMT	234	247	2604	17.9225	3	528.951	1583.83	-1.41236	24.6		True
F1RHL9	NTLQTKL	346	352	1328	15.0442	2	409.242	816.469	-2.04827	16.45		False
F1RHL9	LETIDQLHL	511	519	2385	29.0632	2	541.298	1080.58	0.293932	45.26		False
F1RHL9	IQSLITAHEQF	551	561	5816	25.1869	2	643.84	1285.67	-0.75665	30.2		True
F1RHL9	KATLPEADGERQSIL	562	576	2761	19.8153	2	814.435	1626.86	-1.53528	78.39		True
F1RHL9	AIQNEVEKVIQSYN	577	590	3536	30.6597	2	817.923	1633.83	-0.292584	33.88		True
F1RHL9	NAIGPWIQNKM	647	657	8259	26.1847	2	636.332	1270.65	-0.210648	40.91		True
F1RHL9	NAIGPWIQNKME	647	658	4913	25.9165	2	700.853	1399.69	-0.786037	40.54		True
F1RHL9	NAIGPWIQNKMEE	647	659	1395	26.2542	2	765.374	1528.73	-0.642414	45.89		True
F1RHL9	KNNIDKLEGDHQL	689	701	8069	15.0617	3	508.597	1522.77	-2.18733	14.74		True
Hemoglobin subunit beta OS=Sus scrofa GN=HBB PE=1 SV=1
Accession	peptide sequence	Start_pos	end_pos	progenesis peptide number	Retention time (min)	Charge	m/z	Measured mass	Mass error (ppm)	Score	Modifications	Use in quantitation
F1RII7	VHLSAEEKE	2	10	10616	10.7811	2	521.264	1040.51	-0.6729	23.11		True
F1RII7	WGKVNVDEVGGEALGRL	16	32	2099	28.0558	3	600.32	1797.94	-0.251869	66.47		True
F1RII7	DEVGGEALGRL	22	32	2991	24.17	2	558.288	1114.56	0.259718	41.52		False
F1RII7	VGGEALGRL	24	32	651	19.2102	2	436.253	870.492	-0.91439	37.34		False
F1RII7	LVVYPWTQR	33	41	2113	26.6379	2	581.324	1160.63	0.0395727	25.9		False
F1RII7	LVVYPWTQRF	33	42	7690	31.913	3	436.908	1307.7	-0.868703	20.03		False
F1RII7	VVYPWTQR	34	41	949	22.9533	2	524.782	1047.55	-0.624639	37.42		False
F1RII7	VVYPWTQRF	34	42	435	29.0632	2	598.316	1194.62	-0.717069	42.85		False
F1RII7	FSDGLKHLDNLKGTF	72	86	6312	23.4602	3	564.63	1690.87	0.52352	55.98		False
F1RII7	QKVVAGVANALAHKYH	132	147	2284	16.6852	4	427.242	1704.94	-1.72454	117.73		True
Fructose-bisphosphate aldolase OS=Sus scrofa GN=ALDOC PE=1 SV=2
Accession	peptide sequence	Start_pos	end_pos	progenesis peptide number	Retention time (min)	Charge	m/z	Measured mass	Mass error (ppm)	Score	Modifications	Use in quantitation
F1RJ25	PEILPDGDHDLKRCQ	189	203	2671	17.4959	3	579.285	1734.83	-1.44339	89.78		True
F1RJ25	PEILPDGDHDLKRCQY	189	204	7604	20.3899	2	949.956	1897.9	-1.10132	138.75		True
F1RJ25	PEILPDGDHDLKRCQYVTE	189	207	1906	22.3307	3	743.359	2227.06	-0.557796	63		True
F1RJ25	TLLKPNM	227	233	562	18.0419	2	408.735	815.456	-1.80943	14.32		False
Calsequestrin OS=Sus scrofa GN=CASQ1 PE=1 SV=2
Accession	peptide sequence	Start_pos	end_pos	progenesis peptide number	Retention time (min)	Charge	m/z	Measured mass	Mass error (ppm)	Score	Modifications	Use in quantitation
F1RJW7	LYHEPPEDDKASQKQFE	70	86	10024	13.9428	4	515.994	2059.95	-0.283384	66.24		True
F1RJW7	AAQVLEDKGVGF	95	106	1224	23.3047	2	617.327	1232.64	0.1566	25.57		True
F1RJW7	AAQVLEDKGVGFGMVDSEKDAA	95	116	5874	24.4701	3	746.362	2236.07	-1.22104	114.9		True
F1RJW7	GMVDSEKDAAVAKKLGL	107	123	9902	23.074	3	577.981	1730.92	-0.875703	91.23		True
F1RJW7	VAKKLGLTEE	117	126	10530	12.6753	2	544.32	1086.63	-1.86523	19.15		True
F1RJW7	IGYFKNKDSEHYKA	183	196	11219	12.1752	4	425.716	1698.84	-0.140625	30.86		True
F1RJW7	DSKVAKKLTLKL	215	226	1220	15.9057	4	336.72	1342.85	-4.35572	55.31		True
F1RJW7	MEEPVTIPDKPNSE	236	249	4401	21.2639	2	793.373	1584.73	-1.34245	64.34		True
F1RJW7	MEEPVTIPDKPNSEE	236	250	1486	21.422	2	857.895	1713.78	-0.811979	50.67		True
F1RJW7	MEEPVTIPDKPNSEEE	236	251	1181	21.5945	2	922.416	1842.82	-0.841414	47.11		True
F1RJW7	MEEPVTIPDKPNSEEEIVHF	236	255	6585	28.7218	3	780.707	2339.1	-0.0583009	80.33		True
F1RJW7	PVTIPDKPNSEEE	239	251	5734	17.2811	2	727.853	1453.69	-1.3417	36.66		True
F1RJW7	YETWEDDMDGIH	273	284	3316	26.8245	2	755.792	1509.57	-1.54235	104.02		True
F1RJW7	YETWEDDMDGIHIVA	273	287	3602	33.9374	2	897.388	1792.76	-0.481536	53.82		True
Sarcalumenin OS=Sus scrofa GN=SRL PE=1 SV=2
Accession	peptide sequence	Start_pos	end_pos	progenesis peptide number	Retention time (min)	Charge	m/z	Measured mass	Mass error (ppm)	Score	Modifications	Use in quantitation
F1RK48	AADSARSFSPLEKFGQN	558	574	3148	22.9533	3	608.967	1823.88	-0.813691	26.49		True
F1RK48	AADSARSFSPLEKFGQNF	558	575	8361	28.5365	3	657.99	1970.95	-0.194507	36.56		True
F1RK48	VVFDPTKL	629	636	1811	28.0002	2	459.768	917.521	-0.7733	27.2		True
F1RK48	VVFDPTKLDVGLE	629	641	8608	34.3372	2	716.39	1430.76	-0.723953	24.06		True
F1RK48	VFKDIVEDPDKF	773	784	2989	23.9316	3	484.585	1450.73	-0.56107	19.44		True
Uncharacterized protein OS=Sus scrofa GN=PEBP1 PE=1 SV=1
Accession	peptide sequence	Start_pos	end_pos	progenesis peptide number	Retention time (min)	Charge	m/z	Measured mass	Mass error (ppm)	Score	Modifications	Use in quantitation
F1RKG8	PVDLGKWSGPLS	2	13	3378	28.7218	2	628.338	1254.66	0.441225	41.53		True
F1RKG8	PVDLGKWSGPLSL	2	14	2200	34.4935	2	684.88	1367.74	-0.16604	78.67		True
F1RKG8	QEVDERPQHPLQVKYGGAE	15	33	3916	15.7792	4	545.773	2179.06	-1.82945	46.14		True
F1RKG8	VDELGKVLTPTQVKSRPTSITWDGLNPDKL	34	63	7140	29.1957	5	662.363	3306.78	-0.950937	61.27		True
F1RKG8	SDYVGSGPPKGTGL	103	117	4933	19.1863	2	667.832	1333.65	-0.916861	16.08		True
F1RKG8	YQAEWDDYVPKL	169	180	7736	33.1709	2	763.862	1525.71	-0.292039	64.31		True
F1RKG8	QAEWDDYVPKL	170	180	5562	32.2271	2	682.33	1362.64	-0.726274	39.83		True
F1RKG8	WDDYVPKL	173	180	2650	28.3025	2	518.261	1034.51	-0.245448	24.94		True
Heat shock protein family B (small) member 6 OS=Sus scrofa GN=HSPB6 PE=1 SV=1
Accession	peptide sequence	Start_pos	end_pos	progenesis peptide number	Retention time (min)	Charge	m/z	Measured mass	Mass error (ppm)	Score	Modifications	Use in quantitation
F1RM62	LRRASAPLPGLSAPGRL	12	28	3932	20.4783	4	433.764	1731.03	-0.774965	20.86		True
F1RM62	RRASAPLPGLSAPGRL	13	28	10266	19.4175	3	540.321	1617.94	-0.659986	14.64		True
F1RM62	PSVALPTAQVPTDPGHF	58	74	2447	28.9471	2	867.446	1732.88	-0.799469	91.78		False
F1RM62	LDVKHFSPEE	78	87	4615	18.4264	2	600.797	1199.58	-1.48822	22.7		False
F1RM62	IAVKVVGE	88	95	999	17.2811	2	407.755	813.495	-1.66019	24.8		False
Hemopexin OS=Sus scrofa GN=HPX PE=1 SV=2
Accession	peptide sequence	Start_pos	end_pos	progenesis peptide number	Retention time (min)	Charge	m/z	Measured mass	Mass error (ppm)	Score	Modifications	Use in quantitation
F1RMN7	LRFDPVTGHVDPKYPRDVRD	208	227	10932	19.1181	5	477.252	2381.23	0.535345	49.72		True
F1RMN7	AAFSWDDKL	303	311	3776	28.0002	2	526.756	1051.5	-0.201679	28.28		True
F1RMN7	VDNYPKQLEKELGSPHGISL	331	350	9128	27.613	4	556.795	2223.15	-0.680811	17.88		True
F1RMN7	GAQGPWTELPWPHEKVDA	381	398	9351	29.9149	3	673.33	2016.97	-0.479387	56.67		True
Cytochrome b-c1 complex subunit Rieske, mitochondrial OS=Sus scrofa GN=LOC100522678 PE=1 SV=1
Accession	peptide sequence	Start_pos	end_pos	progenesis peptide number	Retention time (min)	Charge	m/z	Measured mass	Mass error (ppm)	Score	Modifications	Use in quantitation
F1RNZ1	SATSRGVAGALRPLVQ	16	31	7128	20.9358	3	528.305	1581.89	-0.726631	53.02		True
F1RNZ1	SVGLNVPASVRY	67	78	6117	24.708	2	631.348	1260.68	-0.763294	14.29		True
ATP synthase subunit alpha OS=Sus scrofa GN=ATP5F1A PE=1 SV=1
Accession	peptide sequence	Start_pos	end_pos	progenesis peptide number	Retention time (min)	Charge	m/z	Measured mass	Mass error (ppm)	Score	Modifications	Use in quantitation
F1RPS8	VEFSSGLKGMSL	76	87	3012	28.7993	2	627.823	1253.63	-0.342438	52.03		True
F1RPS8	VVVFGNDKL	96	104	1090	24.1464	2	495.784	989.554	-0.367688	27.86		True
Alpha-1,4 glucan phosphorylase OS=Sus scrofa GN=PYGM PE=1 SV=2
Accession	peptide sequence	Start_pos	end_pos	progenesis peptide number	Retention time (min)	Charge	m/z	Measured mass	Mass error (ppm)	Score	Modifications	Use in quantitation
F1RQQ8	TLVKDRNVANARD	39	51	10132	10.5817	3	491.27	1470.79	-1.41841	64.67		True
F1RQQ8	TLVKDRNVANARDYY	39	53	2390	15.9057	3	599.979	1796.91	-1.51228	121.09		True
F1RQQ8	VKDRNVANARDYY	41	53	8992	12.6416	3	528.602	1582.78	-0.825784	43.55		True
F1RQQ8	YTVRDHLVGRW	58	68	6244	19.1181	3	467.917	1400.73	-0.501795	21.48		True
F1RQQ8	EFYMGRTLQNTM	89	100	3613	26.5794	2	745.842	1489.67	-0.606145	13.7		True
F1RQQ8	LEEMEEDAGLGNGGLGRL	123	140	7058	28.6889	2	930.444	1858.87	0.659835	115.85		False
F1RQQ8	EEMEEDAGLGNGGLGRL	124	140	3286	26.9242	2	873.899	1745.78	-2.94413	84.49		False
F1RQQ8	MEEDAGLGNGGLGRL	126	140	591	25.588	2	744.858	1487.7	-1.33103	102.11		False
F1RQQ8	EEDAGLGNGGLGRL	127	140	3912	24.2245	2	679.339	1356.66	-0.615465	53.31		False
F1RQQ8	DAGLGNGGLGRL	129	140	1080	24.4107	2	550.295	1098.58	-1.83707	73.18		False
F1RQQ8	AAYGYGIRY	154	162	4928	21.3973	2	517.256	1032.5	-6.15482	27.92		False
F1RQQ8	AAYGYGIRYE	154	163	4304	20.8406	2	581.779	1161.54	-1.3278	32.45		False
F1RQQ8	AAYGYGIRYEF	154	164	7766	27.944	2	655.316	1308.62	1.99639	30.22		False
F1RQQ8	WEKARPEFTL	190	199	4184	22.2225	2	638.838	1275.66	-0.382547	23.57		True
F1RQQ8	WEKARPEFTLPVHF	190	203	3335	28.2491	3	586.31	1755.91	-0.815174	15.38		True
F1RQQ8	LAMPYDTPVPGYRNNVVNT	223	241	5265	28.0558	2	1061.02	2120.03	-0.599282	58.98		True
F1RQQ8	AMPYDTPVPGYRN	224	236	3608	22.6831	2	740.847	1479.68	-1.375	27.26		True
F1RQQ8	AMPYDTPVPGYRNNVVNT	224	241	1112	25.1211	2	1004.48	2006.95	-1.23316	43.73		True
F1RQQ8	PYDTPVPGYRNNVVNT	226	241	9706	22.1536	2	903.445	1804.87	0.0387967	24.98		True
F1RQQ8	WSAKAPNDF	245	253	471	20.6376	2	518.248	1034.48	-0.124387	34.62		False
F1RQQ8	WSAKAPNDFNLKD	245	257	1804	21.2639	2	753.372	1504.73	-1.25872	65.39		True
F1RQQ8	FEGKELRL	287	294	8721	18.2528	2	496.282	990.549	-0.382275	22.16		False
F1RQQ8	DAFPDKVAIQ	328	337	1448	23.7716	2	552.29	1102.57	-0.415315	21.71		True
F1RQQ8	LNRVAAAYPGDVDRL	412	426	5189	21.1243	3	543.961	1628.86	-0.596803	29.03		True
F1RQQ8	VEEGAVKRINM	432	442	3425	14.87	2	623.334	1244.65	-1.72792	52.98		True
F1RQQ8	VEEGAVKRINM	432	442	9996	14.87	3	421.223	1260.65	-2.3747	25.16	[11] Oxidation (M)	True
F1RQQ8	VEEGAVKRINMAHL	432	445	5978	17.9782	3	522.951	1565.83	-2.48777	26.74		True
F1RQQ8	YELEPHKFQNKTNGITPRRW	473	492	8328	17.8394	5	503.665	2513.29	-1.74357	38.37		True
F1RQQ8	YIADLDQLRKLLS	512	524	10981	35.5434	3	516.631	1546.87	-0.00590464	41.24		True
F1RQQ8	FDIQVKRIHE	564	573	3054	17.5201	4	321.931	1283.7	-1.85608	13.66		True
F1RQQ8	DIQVKRIHE	565	573	10000	12.1752	3	379.884	1136.63	-0.824116	19.23		True
F1RQQ8	YNRIKKEPNKF	588	598	11229	10.2782	4	359.955	1435.79	-1.78411	16.8		True
F1RQQ8	IGGKAAPGYHMAKM	606	619	9608	13.2672	2	716.364	1430.71	-1.4263	65.05		False
F1RQQ8	ITAIGDVVNHDPVVGDRL	624	641	6720	26.9242	2	945.507	1889	-0.716495	168.51		False
F1RQQ8	AIGDVVNHDPVVGDRL	626	641	873	24.0477	3	559.297	1674.87	-0.522638	110.29		True
F1RQQ8	IGDVVNHDPVVGDRL	627	641	401	21.5751	3	535.618	1603.83	-0.309717	117.96		True
F1RQQ8	DVVNHDPVVGDR	629	640	9230	36.9667	2	661.325	1320.63	-5.75765	16.06		True
F1RQQ8	DVVNHDPVVGDRL	629	641	10570	20.1941	3	478.916	1433.73	-0.855152	23.52		True
F1RQQ8	LENYRVSL	646	653	507	22.1064	2	497.271	992.528	-0.921487	21.8		False
F1RQQ8	LSEQISTAGTEASGTGNMKF	663	682	2361	24.1965	2	1014.98	2027.95	-0.929183	127.16		False
F1RQQ8	SEQISTAGTEASGTGNMKF	664	682	2496	21.9781	2	958.437	1914.86	-1.29845	131.58		False
F1RQQ8	ISTAGTEASGTGNMKF	667	682	953	20.3264	2	786.371	1570.73	-1.30976	146.56		False
F1RQQ8	LSSGFFSPKQPDL	746	758	10859	27.6389	2	711.866	1421.72	-1.09864	66.15		True
F1RQQ8	SSGFFSPKQPDL	747	758	910	25.3999	2	655.324	1308.63	-0.878772	28.28		True
F1RQQ8	FFSPKQPDL	750	758	751	23.2596	2	539.782	1077.55	-0.108143	20.04		False
F1RQQ8	FSPKQPDL	751	758	408	18.0214	2	466.247	930.48	-0.995454	23.68		False
F1RQQ8	LMHHDRF	766	772	10587	10.7811	3	319.157	954.448	-1.34913	28.45		True
F1RQQ8	YKNPREWTR	792	800	11434	11.7223	4	313.166	1248.63	-1.51663	32.34		True
F1RQQ8	VIRNIATSGKFSSD	802	815	7680	15.9974	2	747.898	1493.78	-1.328	16.16		True
F1RQQ8	VIRNIATSGKFSSDRTIAQ	802	820	747	16.7051	4	516.785	2063.11	-0.991855	60.83		True
F1RQQ8	IATSGKFSSDRTIAQ	806	820	6556	14.6011	3	527.945	1580.81	-1.73559	70.34		True
Heat shock protein 90 alpha family class B member 1 OS=Sus scrofa GN=HSP90AB1 PE=1 SV=1
Accession	peptide sequence	Start_pos	end_pos	progenesis peptide number	Retention time (min)	Charge	m/z	Measured mass	Mass error (ppm)	Score	Modifications	Use in quantitation
F1RQU2	LVDTGIGMTKADL	86	98	7231	24.7761	2	667.355	1332.7	0.0419899	71.9		True
F1RQU2	IRGVVDSEDLPLNISRE	377	393	10432	26.3115	3	638.009	1911	-0.795887	29.56		True
Actinin alpha 3 (gene/pseudogene) OS=Sus scrofa GN=ACTN3 PE=1 SV=1
Accession	peptide sequence	Start_pos	end_pos	progenesis peptide number	Retention time (min)	Charge	m/z	Measured mass	Mass error (ppm)	Score	Modifications	Use in quantitation
F1RU49	MEQEEDWDRDLL	28	39	5400	29.8245	2	789.84	1577.67	-1.06813	48.42		False
F1RU49	HKIANVNKALD	103	113	9821	11.0224	2	611.848	1221.68	-0.807667	15.79		False
F1RU49	FIASKGVKL	114	122	1572	16.6216	3	321.539	961.594	-2.13696	17.91		False
F1RU49	IASKGVKL	115	122	11151	11.9199	2	408.271	814.527	-1.13333	26.99		False
F1RU49	ISVEETSAKEGLL	154	166	2657	23.8598	2	688.365	1374.72	-5.6811	50.7		False
F1RU49	ISVEETSAKEGLLL	154	167	4215	28.2816	2	744.911	1487.81	-0.171131	57.98		False
F1RU49	EETSAKEGLLL	157	167	1938	23.5107	2	595.319	1188.62	-0.282812	13.14		False
F1RU49	EVAEKYLDIPKM	225	236	2924	25.2697	3	479.255	1434.74	0.452491	19.41		False
F1RU49	EVAEKYLDIPKML	225	237	3329	29.8245	3	516.949	1547.83	-0.571649	45.51		False
F1RU49	EVAEKYLDIPKMLD	225	238	3499	29.395	3	555.292	1662.85	0.117179	17.86		False
F1RU49	EVAEKYLDIPKMLDAED	225	241	10771	31.2501	2	989.987	1977.96	-0.443884	38.68		False
F1RU49	VAEKYLDIPKM	226	236	3751	23.7074	3	436.24	1305.7	-0.820076	42.46		False
F1RU49	VAEKYLDIPKML	226	237	5441	28.3267	3	473.935	1418.78	-0.00459008	24.99		False
F1RU49	VAEKYLDIPKMLD	226	238	3709	27.944	3	512.278	1533.81	-0.120247	42.25		False
F1RU49	IVNTPKPDEKAIM	242	254	967	17.5201	3	485.934	1454.78	-0.924772	29.54		True
F1RU49	IVNTPKPDEKAIMT	242	255	1507	17.3852	3	519.616	1555.83	-1.12558	13.8		True
F1RU49	NTLQTKL	354	360	1328	15.0442	2	409.242	816.469	-2.04827	16.45		False
F1RU49	KATLPEADRERGAIL	571	585	1638	17.1605	4	410.733	1638.9	-0.938518	26.5		True
F1RU49	NAIGPWIQGKVEE	656	668	1298	25.9165	2	720.877	1439.74	-1.39528	30.98		True
F1RU49	IGPWIQGKVEE	658	668	2579	23.7919	2	628.337	1254.66	-0.473068	37.37		True
Uncharacterized protein OS=Sus scrofa GN=MYOM2 PE=1 SV=2
Accession	peptide sequence	Start_pos	end_pos	progenesis peptide number	Retention time (min)	Charge	m/z	Measured mass	Mass error (ppm)	Score	Modifications	Use in quantitation
F1RVL5	SWDPPTPRGKEPL	157	169	7613	19.88	3	493.924	1478.75	-1.15061	27.22		True
F1RVL5	SWDPPTPRGKEPLM	157	170	4110	22.1064	3	537.604	1609.79	-0.553804	20.71		True
F1RVL5	TIVVPSAPGRVL	235	246	6279	25.736	2	604.871	1207.73	-1.5886	44.18		True
F1RVL5	IVVPSAPGRVL	236	246	3950	24.7761	2	554.348	1106.68	-0.403028	48.43		True
F1RVL5	VVQWDQPKHGEDL	256	268	3763	18.5542	3	517.591	1549.75	-1.21054	19.85		True
F1RVL5	LTVPSHPYGITL	335	346	1068	29.1696	2	649.361	1296.71	-0.997409	33.27		True
F1RVL5	LWKAPVYSGSSPVSGY	459	474	4644	26.9517	2	849.429	1696.84	-1.07355	47.91		True
F1RVL5	MALSNEIKNPTIPLKSEL	632	649	5795	27.8453	3	666.703	1997.09	-0.477106	59.89		True
F1RVL5	IKNPTIPLKSEL	638	649	9381	21.2639	2	676.911	1351.81	-0.057866	31.82		True
F1RVL5	IFDKGQVRF	653	661	4950	20.4082	3	370.541	1108.6	-1.26412	45.9		True
F1RVL5	WLQAEHLSPDASY	662	674	3765	25.565	2	758.856	1515.7	-1.08605	35.99		True
F1RVL5	YETEKLPDL	797	805	6475	23.972	2	554.281	1106.55	-1.02994	25.86		True
F1RVL5	YETEKLPDLEKGVCE	797	811	3797	23.7716	3	584.95	1751.83	-0.325114	72.97		True
Fibrinogen gamma chain precursor OS=Sus scrofa GN=FGG PE=1 SV=2
Accession	peptide sequence	Start_pos	end_pos	progenesis peptide number	Retention time (min)	Charge	m/z	Measured mass	Mass error (ppm)	Score	Modifications	Use in quantitation
F1RX35	ITTHDSTIRF	127	136	3237	17.698	3	397.543	1189.61	-1.69523	56.53		True
F1RX35	WLGNEKIHL	254	262	2488	23.5848	3	370.541	1108.6	-0.960434	59.57		True
Fibrinogen alpha chain OS=Sus scrofa GN=FGA PE=1 SV=2
Accession	peptide sequence	Start_pos	end_pos	progenesis peptide number	Retention time (min)	Charge	m/z	Measured mass	Mass error (ppm)	Score	Modifications	Use in quantitation
F1RX36	INLLPSRDRQYLPL	211	224	7501	29.3353	3	566.661	1696.96	-0.0570095	17.22		False
F1RX36	IKISPLPDITPAD	225	237	3274	29.5141	2	690.391	1378.77	-2.32346	14.84		True
F1RX36	IKISPLPDITPADF	225	238	4533	35.7657	2	763.926	1525.84	-0.848651	19.39		True
Solute carrier family 25 member 4 OS=Sus scrofa GN=SLC25A4 PE=1 SV=1
Accession	peptide sequence	Start_pos	end_pos	progenesis peptide number	Retention time (min)	Charge	m/z	Measured mass	Mass error (ppm)	Score	Modifications	Use in quantitation
F1RZQ6	VVRIPKEQGF	58	67	1284	17.8188	3	391.564	1171.67	-2.118	13.59		True
F1RZQ6	YDEIKKYV	291	298	4339	17.32	2	529.281	1056.55	-1.33531	17.05		True
Amylo-alpha-1, 6-glucosidase, 4-alpha-glucanotransferase OS=Sus scrofa GN=AGL PE=1 SV=1
Accession	peptide sequence	Start_pos	end_pos	progenesis peptide number	Retention time (min)	Charge	m/z	Measured mass	Mass error (ppm)	Score	Modifications	Use in quantitation
F1S557	YTKWNPAASPSDTGEVNF	677	694	4855	26.2542	2	992.457	1982.9	-0.375271	21.38		True
F1S557	LDTAWKQMSSF	1019	1029	7760	28.3985	2	657.312	1312.61	-1.89444	35.69		True
Phosphoglucomutase 1 OS=Sus scrofa GN=PGM1 PE=1 SV=2
Accession	peptide sequence	Start_pos	end_pos	progenesis peptide number	Retention time (min)	Charge	m/z	Measured mass	Mass error (ppm)	Score	Modifications	Use in quantitation
F1S814	IQSIISTVEPAHRQEATL	40	57	5991	23.7477	3	665.027	1992.06	-2.36293	97.26		True
F1S814	TVEPAHRQEATL	46	57	9360	12.2099	2	676.347	1350.68	-6.50387	18.39		True
F1S814	VVGGDGRF	58	65	3136	14.4829	2	403.711	805.407	-2.08204	22.42		True
F1S814	TASHNPGGPNGDFGIKF	115	131	2191	23.5324	3	572.609	1714.81	-0.0578102	49		True
F1S814	NISNGGPAPEAITDKIFQ	132	149	2455	29.7313	2	936.478	1870.94	-0.759462	123.43		True
F1S814	DLENKFKPFTVE	176	187	3399	25.9165	2	733.879	1465.74	-1.46556	36.72		True
F1S814	NALKELLSGPNRL	206	218	7746	26.8742	2	712.914	1423.81	-0.798133	59.64		True
F1S814	FDGDGDRNMILGKHGF	287	302	5618	21.6358	4	445.462	1777.82	-1.10185	13.36		True
F1S814	ANIFSIPYFQQTGVRG	315	330	8343	34.689	2	899.467	1796.92	-0.768503	55.97		True
F1S814	FSIPYFQQTGVRG	318	330	3287	30.5816	2	750.385	1498.76	-1.18418	90.59		True
F1S814	FSIPYFQQTGVRGF	318	331	10234	35.095	2	823.919	1645.82	-1.15606	108.93		True
F1S814	YETPTGWKF	353	361	521	27.5099	2	564.771	1127.53	-1.0223	27.31		True
F1S814	YETPTGWKFFGNL	353	365	7752	35.7989	2	780.38	1558.74	-0.681696	41.06		True
F1S814	FEYSDPVDGSISRNQGL	474	490	5981	26.8245	2	942.441	1882.87	-1.27711	95.55		True
F1S814	YSDPVDGSISRNQGL	476	490	1568	22.2897	2	804.386	1606.76	-0.750564	100.4		True
F1S814	ADGSRIIF	495	502	737	22.8857	2	439.74	877.465	-1.06746	14.14		True
Dihydrolipoyl dehydrogenase OS=Sus scrofa GN=DLD PE=1 SV=1
Accession	peptide sequence	Start_pos	end_pos	progenesis peptide number	Retention time (min)	Charge	m/z	Measured mass	Mass error (ppm)	Score	Modifications	Use in quantitation
F1SAF0	IATGSEVTPFPGITIDE	181	197	9027	36.7993	2	873.944	1745.87	0.277089	15.14		True
F1SAF0	GIELDPRGRIPVNTRF	328	343	8967	24.8684	4	460.759	1839.01	-2.82669	24.8		True
F1SAF0	VEGMAGGAVHIDY	374	386	10920	24.1464	2	659.809	1317.6	0.117943	24.77		True
Pyruvate kinase OS=Sus scrofa GN=PKM PE=1 SV=2
Accession	peptide sequence	Start_pos	end_pos	progenesis peptide number	Retention time (min)	Charge	m/z	Measured mass	Mass error (ppm)	Score	Modifications	Use in quantitation
F1SHL9	IQTQQLHAAMADT	22	34	1267	19.2558	2	714.351	1426.69	-0.682841	14.83		True
F1SHL9	LEHMCRL	36	42	3965	15.1707	3	301.15	900.429	-2.61856	18.71		True
F1SHL9	DIDSPPITARNTG	43	55	4890	18.7728	2	678.841	1355.67	-0.793785	54.29		True
F1SHL9	DIDSPPITARNTGII	43	57	2214	28.1693	2	791.925	1581.83	-1.02618	71.52		True
F1SHL9	DIDSPPITARNTGIIC	43	58	2954	28.9234	2	843.429	1684.84	-0.680715	54.23		True
F1SHL9	DIDSPPITARNTGIICT	43	59	2682	28.3521	2	893.953	1785.89	-0.83745	51.38		True
F1SHL9	TIGPASRSVETL	59	70	2783	19.88	2	615.838	1229.66	-0.936854	18.49		True
F1SHL9	TIGPASRSVETLKE	59	72	4043	16.0962	3	496.606	1486.8	-1.48538	19.51		True
F1SHL9	IGPASRSVETL	60	70	884	18.9199	2	565.314	1128.61	-0.192983	18.43		True
F1SHL9	IGPASRSVETLKE	60	72	7413	15.1482	2	693.882	1385.75	-1.22288	14.42		True
F1SHL9	KEMIKSGMNVARL	71	83	6326	16.6852	3	492.939	1475.79	-0.385663	92.42		True
F1SHL9	MIKSGMNVARL	73	83	1290	18.002	3	407.226	1218.66	-2.05244	51.71		True
F1SHL9	VALDTKGPEIRTGL	119	132	3570	21.5547	2	735.419	1468.82	-0.579628	93.12		True
F1SHL9	VALDTKGPEIRTGLIKGSGTAE	119	140	2720	20.4082	3	738.408	2212.2	-1.44246	119.69		True
F1SHL9	LDTKGPEIRTGL	121	132	8751	18.9864	2	650.367	1298.72	0.117598	66.59		True
F1SHL9	DTKGPEIRTGL	122	132	1958	17.264	2	593.824	1185.63	-0.733503	15.32		True
F1SHL9	DTKGPEIRTGLIKGSGTAE	122	140	1384	16.9765	3	644.012	1929.01	-1.55739	42.29		True
F1SHL9	VELKKGATL	141	149	3674	13.1308	2	479.8	957.585	-1.12282	20.84		True
F1SHL9	NVLWLDYKN	164	172	10798	28.6567	2	582.806	1163.6	0.137732	18.15		True
F1SHL9	LDYKNICKV	168	176	7233	21.6358	3	365.867	1094.58	-1.53571	46.93		True
F1SHL9	KVVDVGSKV	175	183	7683	12.2419	2	465.784	929.554	-0.877844	14.69		True
F1SHL9	KVVDVGSKVYVDDGL	175	189	4211	22.418	2	796.929	1591.84	-1.01471	56.08		True
F1SHL9	VDVGSKVYVDDGL	177	189	2027	24.6001	2	683.349	1364.68	0.70428	37.31		True
F1SHL9	LVKQKGPDF	193	201	4414	12.496	2	516.297	1030.58	-1.71253	42.99		True
F1SHL9	LVTEVENGGFLGSKKGVNLPGAA	202	224	3060	26.2542	3	753.077	2256.21	-0.431599	66.89		True
F1SHL9	VTEVENGGFLGSKKGVNLPGAA	203	224	2143	23.7716	3	715.384	2143.13	1.32321	86.43		True
F1SHL9	EVENGGFLGSKKGVNLPGAA	205	224	1992	22.9533	2	972.512	1943.01	-1.1495	65.35		True
F1SHL9	VENGGFLGSKKGVNLPGAA	206	224	3592	22.0167	2	907.99	1813.97	-1.45315	61.32		True
F1SHL9	VDLPAVSEKDIQD	225	237	501	23.9992	2	714.864	1427.71	-0.926845	34.6		True
F1SHL9	VDLPAVSEKDIQDL	225	238	9248	30.521	2	771.404	1540.79	-3.77657	14.23		True
F1SHL9	VDLPAVSEKDIQDLKF	225	240	326	32.0419	3	606.328	1815.96	-0.0204619	124.93		True
F1SHL9	VDLPAVSEKDIQDLKFGVE	225	243	8150	32.4725	3	701.371	2101.09	-1.20181	121.58		True
F1SHL9	VDLPAVSEKDIQDLKFGVEQDVD	225	247	5084	33.3827	3	853.765	2558.27	-0.594657	13.29		True
F1SHL9	PAVSEKDIQDLKF	228	240	965	25.428	3	497.268	1488.78	-0.631464	23.14		True
F1SHL9	GIEIPAEKVF	307	316	1948	28.7481	2	551.811	1101.61	0.30624	22.1		False
F1SHL9	IEIPAEKVFL	308	317	702	32.0096	2	579.842	1157.67	-0.479145	14.52		False
F1SHL9	IMLSGETAKGDYPLE	368	382	3333	25.214	2	812.399	1622.78	-1.20096	71.15		True
F1SHL9	PVVCKDPVQEA	480	490	422	17.2406	2	592.802	1183.59	-1.40604	38.74		True
F1SHL9	AMNVGKARGF	502	511	9890	13.6614	2	525.778	1049.54	-2.58762	42.69		True
F1SHL9	IVLTGWRPGSGFTNT	519	533	4740	29.4525	2	803.423	1604.83	0.27543	43.56		True
F1SHL9	TGWRPGSGF	522	530	4923	21.7124	2	482.735	963.455	-1.0911	28.6		True
Nebulin OS=Sus scrofa GN=NEB PE=1 SV=2
Accession	peptide sequence	Start_pos	end_pos	progenesis peptide number	Retention time (min)	Charge	m/z	Measured mass	Mass error (ppm)	Score	Modifications	Use in quantitation
F1SHX0	VSDIDYRNYLHQ	141	152	8819	23.1475	2	761.867	1521.72	-0.714966	38.33		True
F1SHX0	AKINSVNQSDVKYKETFNKL	477	496	9975	17.6584	4	582.315	2325.23	-0.360913	44.36		True
F1SHX0	IFSPDTPYITHSKDMGKL	502	519	3142	23.3712	4	513.263	2049.02	-0.127991	82.02		True
F1SHX0	YTLPKSVDDDPNTARC	817	832	4874	19.0777	3	598.949	1793.82	-0.48192	108.05		True
F1SHX0	LEPPEVKHAME	1771	1781	5462	16.1367	3	427.216	1278.63	-1.13309	13.01		True
F1SHX0	TSVVDTPEIIHA	2125	2136	10617	24.8684	2	641.337	1280.66	-1.8265	41.15		True
F1SHX0	YKEDVSPGTAIGKTPEM	2218	2234	4364	19.8153	3	608.301	1821.88	-0.25731	35.29		True
F1SHX0	YKENLGTGIPTPVTPEIE	2280	2297	6085	28.5995	2	979.51	1957.01	0.51309	14.1		True
Parvalbumin alpha OS=Sus scrofa GN=PVALB PE=1 SV=1
Accession	peptide sequence	Start_pos	end_pos	progenesis peptide number	Retention time (min)	Charge	m/z	Measured mass	Mass error (ppm)	Score	Modifications	Use in quantitation
F1SKJ8	LNAEDIKKAVGAF	7	19	5333	28.9471	2	688.382	1374.75	-0.525737	74.54		True
F1SKJ8	NAEDIKKAVGAF	8	19	1961	21.7124	2	631.84	1261.67	-1.01647	42.74		True
F1SKJ8	EDIKKAVGAF	10	19	9614	19.1006	2	539.301	1076.59	0.583788	36.65		True
F1SKJ8	TAVDSFDHKKF	20	30	3723	14.87	3	432.218	1293.63	-1.56038	53.15		True
F1SKJ8	TAVDSFDHKKFFQ	20	32	6949	20.1269	3	523.928	1568.76	-0.216795	100.39		True
F1SKJ8	TAVDSFDHKKFFQM	20	33	8077	23.9316	3	567.608	1699.8	-0.690604	75.64		True
F1SKJ8	ILKGFSPDARD	67	77	1485	16.577	3	406.887	1217.64	-1.85886	54.81		True
F1SKJ8	ILKGFSPDARDLSE	67	80	4931	21.8433	3	516.606	1546.8	-1.90269	48.47		True
F1SKJ8	ILKGFSPDARDLSEKETKTLM	67	87	10911	22.8857	3	793.757	2378.25	-1.09539	43.43		True
F1SKJ8	ILKGFSPDARDLSEKETKTLMAAGDKDGDGKIGADE	67	102	10324	23.7477	5	756.581	3777.87	-0.71421	134.32		True
ATP synthase subunit beta OS=Sus scrofa GN=ATP5F1B PE=1 SV=1
Accession	peptide sequence	Start_pos	end_pos	progenesis peptide number	Retention time (min)	Charge	m/z	Measured mass	Mass error (ppm)	Score	Modifications	Use in quantitation
F1SLA0	PIKIPVGPETL	131	141	9862	28.5112	2	582.355	1162.7	-0.297663	45.91		False
F1SLA0	VDLLAPYAKGGKIGL	190	204	4784	28.4823	3	505.636	1513.89	0.15921	62.43		True
F1SLA0	FGGAGVGKTVL	205	215	1561	20.9149	2	503.29	1004.57	0.212579	17.52		True
F1SLA0	VYGQMNEPPGARARVAL	268	284	8476	20.1705	3	610.321	1827.94	-0.837592	26.1		False
F1SLA0	AIYVPADDLTDPAPATTF	359	376	8350	35.8935	2	939.461	1876.91	-0.627223	23.68		False
F1SLA0	IYVPADDLTDPAPATTF	360	376	6457	35.2184	2	903.943	1805.87	-1.0221	24.57		False
F1SLA0	LGIYPAVDPLDST	392	404	8214	36.0209	2	680.853	1359.69	-0.178954	14.71		False
F1SLA0	VFTGHLGKLVPLKE	473	486	10746	21.8012	4	385.232	1536.9	-1.8818	35.83		False
Alpha-2-macroglobulin OS=Sus scrofa GN=A2M PE=1 SV=2
Accession	peptide sequence	Start_pos	end_pos	progenesis peptide number	Retention time (min)	Charge	m/z	Measured mass	Mass error (ppm)	Score	Modifications	Use in quantitation
F1SLX2	LTMPYSVIRGEG	799	810	5423	26.6058	2	661.841	1321.67	-1.61894	19.34		True
F1SLX2	LEIPLAVTHPVVRSAL	1115	1130	7915	29.1151	3	572.345	1714.01	0.137054	87.12		True
Uncharacterized protein OS=Sus scrofa GN=MYL6B PE=1 SV=1
Accession	peptide sequence	Start_pos	end_pos	progenesis peptide number	Retention time (min)	Charge	m/z	Measured mass	Mass error (ppm)	Score	Modifications	Use in quantitation
F1SLZ3	RVLGYPKSDELKTRRID	50	66	10164	14.7118	4	512.291	2045.14	-1.35051	16.57		True
F1SLZ3	RVLGYPKSDELKTRRIDF	50	67	8067	19.1181	5	439.448	2192.21	-0.591661	48.05		True
F1SLZ3	GAELRHVL	106	113	1713	14.6011	3	298.843	893.506	-2.46293	18.34		False
F1SLZ3	EAFLKHILS	142	150	3249	23.7477	3	353.206	1056.6	-0.998939	13.97		True
Myomesin 1 OS=Sus scrofa GN=MYOM1 PE=1 SV=2
Accession	peptide sequence	Start_pos	end_pos	progenesis peptide number	Retention time (min)	Charge	m/z	Measured mass	Mass error (ppm)	Score	Modifications	Use in quantitation
F1SM75	YKNQVPINVHANPGKY	278	293	2439	16.3777	4	461.247	1840.96	0.282483	35.24		True
F1SM75	AVTPYGYASKF	360	370	2923	23.7074	2	602.305	1202.6	-1.1339	35.09		True
F1SM75	VQTHWSGDRATLT	423	435	9534	16.1918	3	491.247	1470.72	-1.00425	20.35		True
F1SM75	ALDPAEKARL	571	580	3450	15.2836	3	361.876	1082.61	-2.65815	48.99		True
F1SM75	FTWSKDYVPTEDSPRL	1140	1155	3314	26.8037	3	647.65	1939.93	-1.57393	80.65		True
F1SM75	ILEKGQVRF	1225	1233	2952	17.264	3	363.885	1088.63	-2.17847	42.54		True
F1SM75	LQINEPTPNDKGKY	1487	1500	6052	16.7436	3	539.613	1615.82	-1.6336	36.68		True
Filamin C OS=Sus scrofa GN=FLNC PE=1 SV=1
Accession	peptide sequence	Start_pos	end_pos	progenesis peptide number	Retention time (min)	Charge	m/z	Measured mass	Mass error (ppm)	Score	Modifications	Use in quantitation
F1SMN5	QRDLSDGLRL	62	71	1691	20.8661	3	391.551	1171.63	-0.957576	17.65		True
F1SMN5	YAVSYVPKVAGL	337	348	3778	28.5112	2	633.858	1265.7	0.187237	26.51		True
F1SMN5	AVTVTYGGDPVPKSPFVVN	942	960	11067	29.1696	2	974.013	1946.01	-1.9026	48.28		True
F1SMN5	VGTPAPFSIDTKGAGTGGLGL	1078	1098	4734	31.8799	2	958.509	1915	-0.554831	102.83		True
F1SMN5	TSGVKVSGPGVEPHGVL	1251	1267	3359	19.3961	3	540.629	1618.87	-0.793659	98.98		True
F1SMN5	YDDVAVPKSPFRVGVTEGCD	1331	1350	11016	26.6058	3	718.676	2153.01	-1.11489	18.65		True
F1SMN5	TVETRGAGTGGLGL	1373	1385	3032	20.0644	2	644.846	1287.68	-1.23099	13.57		True
F1SMN5	PDMSGRYTIT	1605	1614	8477	19.011	2	570.771	1139.53	-1.36502	36.96		True
F1SMN5	ESMLRPFN	1774	1781	5975	22.9301	2	497.244	992.474	-0.830345	14.11		True
F1SMN5	LVIPFTVQKGEL	1782	1793	6796	32.2901	2	672.4	1342.79	-0.631071	40		True
F1SMN5	LVIPFTVQKGELTGE	1782	1796	9623	31.6837	2	815.956	1629.9	-0.784027	37.51		True
F1SMN5	IVDTRNAGYGGLGL	2058	2071	5612	25.6867	2	703.375	1404.74	-0.300845	20.54		True
F1SMN5	AVQLNGARGVID	2425	2436	11176	20.0891	2	606.838	1211.66	-0.430165	18.62		True
F1SMN5	SVTIDGPSKVQL	2534	2545	4720	23.483	2	622.349	1242.68	0.518007	26.54		True
MYL3 OS=Sus scrofa GN=MYL3 PE=1 SV=1
Accession	peptide sequence	Start_pos	end_pos	progenesis peptide number	Retention time (min)	Charge	m/z	Measured mass	Mass error (ppm)	Score	Modifications	Use in quantitation
F1SNW4	RVLGKPKQEELNSKM	96	110	7523	11.6224	4	439.998	1755.96	-1.94861	13.37		True
F1SNW4	GAELRHVL	152	159	1713	14.6011	3	298.843	893.506	-2.46293	18.34		False
F1SNW4	ATLGERL	160	166	3814	16.0301	2	380.221	758.427	-2.4077	24.66		True
F1SNW4	ATLGERLTEDE	160	170	1371	18.9439	2	617.301	1232.59	-1.34355	17.91		True
Myosin binding protein C, slow type OS=Sus scrofa GN=MYBPC1 PE=4 SV=2
Accession	peptide sequence	Start_pos	end_pos	progenesis peptide number	Retention time (min)	Charge	m/z	Measured mass	Mass error (ppm)	Score	Modifications	Use in quantitation
F1SRI8	WELLKNANPNE	202	212	1989	23.6069	2	664.333	1326.65	-3.43516	18.82		True
F1SRI8	EVKWYKNGQEIRPSTKY	273	289	4904	16.3955	4	532.281	2125.09	-0.614738	70.77		True
F1SRI8	YVTAGDEKCSTEL	314	326	8479	18.8349	2	708.321	1414.63	-0.799942	27.66		True
F1SRI8	VTKQLEDTKAYCGE	335	348	10536	15.3552	3	528.923	1583.75	-1.50775	26.98		True
F1SRI8	VSEDDANVKWFKNGE	356	370	7024	20.7264	3	579.941	1736.8	-0.467063	89.23		True
F1SRI8	SVDLKPLKILT	418	428	3462	26.3882	3	409.595	1225.76	-0.731177	15.55		True
F1SRI8	SVDLKPLKILTPLTDQ	418	433	11059	32.0096	2	891.024	1780.03	-0.665567	17.52		True
F1SRI8	SVDLKPLKILTPLTDQTVNLGKE	418	440	9239	31.913	4	631.365	2521.43	-1.87748	20.29		True
F1SRI8	NISGKWTKNSLPVQETDRL	450	468	5542	21.422	4	547.293	2185.14	-2.8905	15.58		True
F1SRI8	VIAGNKLRL	528	536	5593	16.577	3	328.549	982.626	-2.33037	30.66		True
F1SRI8	TWDPPLYDGGSPILGY	630	645	6805	39.9287	2	875.92	1749.82	-0.209041	14.85		True
F1SRI8	NWLPAHKDLID	754	764	3711	23.3712	3	441.235	1320.68	-0.663822	13.53		True
F1SRI8	TITDLPTDAKI	769	779	1354	24.7327	2	594.33	1186.65	0.801297	16.78		True
F1SRI8	TITDLPTDAKIF	769	780	1091	30.5532	2	667.863	1333.71	-0.759017	46.41		True
F1SRI8	VRVKAVNAAGASEPKY	781	796	7884	13.1308	3	553.977	1658.91	-1.42035	17.84		True
F1SRI8	LVIPFQGKPKPE	832	843	4065	20.8406	3	451.602	1351.79	-0.674374	56.86		True
F1SRI8	LVIPFQGKPKPEL	832	844	2039	25.0567	3	489.297	1464.87	-0.707553	68.25		True
F1SRI8	LVIPFQGKPKPELT	832	845	10346	24.2245	3	522.98	1565.92	0.50376	37.59		True
F1SRI8	VIPFQGKPKPEL	833	844	11022	20.1941	3	451.602	1351.78	-1.22356	44.84		True
F1SRI8	VALSWTPPKDDGNA	921	934	4679	24.0219	2	735.864	1469.71	-1.13213	42.01		True
Myosin-2 OS=Sus scrofa GN=MYH2 PE=3 SV=1
Accession	peptide sequence	Start_pos	end_pos	progenesis peptide number	Retention time (min)	Charge	m/z	Measured mass	Mass error (ppm)	Score	Modifications	Use in quantitation
F1SS64	VAEPKESF	40	47	126	15.1707	2	453.731	905.448	-1.68447	22.85		False
F1SS64	VKGTIQSREGGKVTVKTEAGATL	48	70	11187	14.183	3	777.439	2329.3	-0.13045	34.94		True
F1SS64	LTVKEDQVFPMNPPKF	70	85	4625	28.7218	3	630.666	1888.98	0.194446	29.32		False
F1SS64	TVKEDQVFPMNPPK	71	84	3235	20.1705	2	815.418	1628.82	-0.483429	94.09		False
F1SS64	TVKEDQVFPMNPPKF	71	85	108	26.8742	3	592.971	1775.89	-0.0559057	40.92		False
F1SS64	TVKEDQVFPMNPPKF	71	85	7560	23.0468	3	598.302	1791.89	-0.823414	25.78	[10] Oxidation (M)	False
F1SS64	TVKEDQVFPMNPPKFDKIED	71	90	1793	25.6409	3	793.062	2376.16	-1.05399	50.13		False
F1SS64	TVKEDQVFPMNPPKFDKIEDM	71	91	9867	28.424	4	627.809	2507.21	0.0762489	23.52		False
F1SS64	VKEDQVFPMNPPKF	72	85	4463	26.8037	3	559.288	1674.84	-0.2637	17.1		False
F1SS64	DQVFPMNPPK	75	84	5319	23.1902	2	586.792	1171.57	-0.73598	31.08		False
F1SS64	PMNPPKF	79	85	1773	19.0562	2	415.715	829.415	-0.962956	27.26		False
F1SS64	YNLKERY	104	110	5109	13.1308	3	329.174	984.501	-2.07984	23.47		False
F1SS64	YNLKERYA	104	111	10637	13.3715	3	352.853	1055.54	-1.44366	16.47		False
F1SS64	YNLKERYAAW	104	113	578	20.7017	2	657.335	1312.66	-0.151916	19.71		False
F1SS64	YNLKERYAAWM	104	114	4436	24.1173	2	722.855	1443.7	-0.694542	16.55		False
F1SS64	FMLTDRE	165	171	1389	19.7905	2	456.218	910.421	-1.21558	17.01		False
F1SS64	ITGESGAGKTVNT	177	189	7506	11.1698	2	617.817	1233.62	-0.926549	21.94		False
F1SS64	ITGESGAGKTVNTKRVIQ	177	194	11389	12.2099	2	930.02	1858.03	-0.621448	111.36		False
F1SS64	ITGESGAGKTVNTKRVIQY	177	195	3502	14.9132	2	1011.55	2021.09	-1.82084	145.83		False
F1SS64	ITGESGAGKTVNTKRVIQYF	177	196	9407	20.4082	3	723.727	2168.16	-0.303008	92.3		False
F1SS64	FATIAVTGEKKKEEPTSGKMQGTL	196	219	3967	17.1368	4	638.59	2550.33	-1.72163	137.98		False
F1SS64	FATIAVTGEKKKEEPTSGKMQGTLE	196	220	1081	16.9951	4	670.851	2679.38	-0.820708	88.25		False
F1SS64	FATIAVTGEKKKEEPTSGKMQGTLED	196	221	1117	17.2406	4	699.608	2794.4	-1.61005	27.97		False
F1SS64	ATIAVTGEKKKEEPTSGKMQGTL	197	219	9441	13.8918	4	601.823	2403.26	-1.8855	60.32		False
F1SS64	ATIAVTGEKKKEEPTSGKMQGTLE	197	220	5932	13.7631	4	634.084	2532.31	-1.46872	46.74		False
F1SS64	IAVTGEKKKEEPTSGKMQGTL	199	219	7811	12.6753	4	558.802	2231.18	-1.11595	38.25		False
F1SS64	IAVTGEKKKEEPTSGKMQGTLE	199	220	7587	12.6753	3	787.748	2360.22	-1.63549	82.85		False
F1SS64	IAVTGEKKKEEPTSGKMQGTLED	199	221	7239	12.9353	3	826.09	2475.25	-1.273	55.19		False
F1SS64	EAFGNAKTVRNDNSSRF	231	247	9557	14.1268	3	638.313	1911.92	-0.893279	53.54		False
F1SS64	EAFGNAKTVRNDNSSRFGKF	231	250	11435	16.4589	2	1123.06	2244.1	0.357914	29.2		False
F1SS64	AFGNAKTVRNDNSSRFGKF	232	250	4422	15.3552	5	424.019	2115.06	-2.24166	27.2		False
F1SS64	FGNAKTVRNDNSSRFGKF	233	250	1170	14.4829	4	512.012	2044.02	-1.4721	44.45		False
F1SS64	IRIHFGTTGKL	251	261	2210	18.4264	3	414.915	1241.72	-1.94288	20.17		False
F1SS64	IRIHFGTTGKLASAD	251	265	2121	19.2339	2	793.935	1585.86	-1.38383	17.08		False
F1SS64	LEKSRVTFQ	271	279	7319	12.7108	2	554.311	1106.61	-1.51376	15.76		False
F1SS64	YQITSNRKPEL	290	300	334	16.0301	3	450.245	1347.71	-1.00991	30.92		True
F1SS64	YQITSNRKPEL	290	300	1592	16.0301	2	674.864	1347.71	-1.36644	47.31		True
F1SS64	LLITTNPYDYPFISQ	304	318	8472	39.8948	2	892.958	1783.9	-0.51206	26.43		True
F1SS64	LITTNPYDYPFISQ	305	318	2769	36.2117	2	836.415	1670.82	-1.78509	23		True
F1SS64	LITTNPYDYPFISQGE	305	320	7850	36.0854	2	929.449	1856.88	-0.16339	18.06		True
F1SS64	EKVSIYKLTG	348	357	3066	18.5099	2	569.328	1136.64	-2.30983	21.27		False
F1SS64	AVMHYGNLK	358	366	10104	13.3022	3	344.847	1031.52	-1.76811	17.84		False
F1SS64	AVMHYGNLKF	358	367	479	22.418	3	393.87	1178.59	-1.09318	27.78		False
F1SS64	AVMHYGNLKFKQKQREEQAEPDGTE	358	382	9362	13.9676	3	978.477	2932.41	-1.13731	31.64		False
F1SS64	LKALCYPRVKVGNE	399	412	3804	18.5542	3	530.632	1588.87	-0.601594	25.08		False
F1SS64	LCYPRVKVGNE	402	412	131	18.2528	3	426.56	1276.66	-1.96214	14.45		False
F1SS64	YVTKGQTVEQVTNAVGALAKA	413	433	5450	27.7949	3	716.727	2147.16	0.384351	107.22		False
F1SS64	QVTNAVGALAKA	422	433	2848	19.4175	2	571.829	1141.64	-1.16815	48.24		False
F1SS64	QVTNAVGALAKAVYEKM	422	438	6903	32.2553	3	598.325	1791.95	-0.414289	100.98		False
F1SS64	WMVTRINQQL	441	450	3800	26.3614	2	644.845	1287.68	-0.565596	20.48		False
F1SS64	VTRINQQLDTKQPRQ	443	457	6802	11.8193	4	457.006	1823.99	-1.5787	40.21		False
F1SS64	VTRINQQLDTKQPRQYFIG	443	461	10371	20.6376	3	769.085	2304.23	-0.674182	21.64		False
F1SS64	RINQQLDTKQPRQ	445	457	11302	10.4827	2	812.946	1623.88	-1.81945	36.05		False
F1SS64	RINQQLDTKQPRQYF	445	459	7001	17.3396	3	645.677	1934.01	-1.05349	22.16		False
F1SS64	INFTNEKLQQ	481	490	1549	19.5749	2	617.825	1233.63	-0.640925	32.78		False
F1SS64	TNEKLQQFFNHHM	484	496	4722	21.0378	3	558.6	1672.78	-0.654227	94.41		False
F1SS64	KLQQFFNHHM	487	496	9228	16.8153	2	665.329	1328.64	-1.13499	19.14		False
F1SS64	IEKPMGIF	527	534	15	25.7112	2	467.757	933.499	-0.540896	17.95		False
F1SS64	EEECMFPKATDTSF	538	551	8478	28.1154	2	817.839	1633.66	-0.566951	54.98		False
F1SS64	YEQHLGKSANFQKPKPAKGKVEAHF	556	580	9604	12.9353	5	568.705	2838.49	-1.1582	79.45		False
F1SS64	FQKPKPAKGKVEAHF	566	580	7711	11.5255	3	571.326	1710.96	-0.904998	105.56		False
F1SS64	VDYNITGWLDKNKDPLND	589	606	6083	31.2803	3	707.347	2119.02	-1.88351	127.05		False
F1SS64	YNITGWLDKNKDPLN	591	605	8296	28.1693	3	597.64	1789.9	-0.635077	66.43		False
F1SS64	YNITGWLDKNKDPLND	591	606	10351	28.7481	2	953.471	1904.93	-0.113585	37.46		False
F1SS64	NITGWLDKNKDPLN	592	605	2229	25.0312	3	543.286	1626.84	-0.507021	65.4		False
F1SS64	NITGWLDKNKDPLND	592	606	358	25.8255	3	581.628	1741.86	-0.748737	83.23		False
F1SS64	YQKSALKTL	612	620	11344	12.9353	3	351.209	1050.61	-1.69324	19.48		False
F1SS64	FSGAQTGEAEAGGTKKGGKKKGSSF	624	648	11005	10.2782	4	604.561	2414.22	-1.12374	89.65		False
F1SS64	MTNLRSTHPHF	663	673	6725	13.8918	4	335.918	1339.64	-1.66874	25.68		False
F1SS64	VRCIIPNETKTPGAME	674	689	6951	20.1496	3	586.967	1757.88	-0.843435	14.57		False
F1SS64	VRCIIPNETKTPGAMEHE	674	691	245	17.9225	4	507.002	2023.98	-1.05796	76.88		False
F1SS64	IIPNETKTPGAM	677	688	3636	17.6584	2	636.334	1270.65	-4.11871	54.43		False
F1SS64	IIPNETKTPGAME	677	689	3198	17.6315	2	700.857	1399.7	-1.33524	65.22		False
F1SS64	IIPNETKTPGAMEHE	677	691	3968	15.3552	2	833.907	1665.8	-1.66683	83.31		False
F1SS64	IIPNETKTPGAMEHE	677	691	6248	15.3552	3	561.605	1681.79	-2.26192	63.21	[12] Oxidation (M)	False
F1SS64	SAIPEGQYIDSKKASEKL	732	749	5059	18.4264	3	655.349	1963.02	-0.965201	102.58		False
F1SS64	ITRTQARCRGFL	789	800	5869	14.1268	4	356.2	1420.77	-2.25098	21.42		False
F1SS64	IQYNIRAF	818	825	8083	24.9149	2	512.782	1023.55	-1.22873	18.13		False
F1SS64	IQYNIRAFM	818	826	4380	29.6715	2	578.302	1154.59	-0.215282	23.72		False
F1SS64	FMNVKHWPW	825	833	6920	27.2479	3	415.539	1243.59	-1.20696	15.5		False
F1SS64	FMNVKHWPWMK	825	835	5904	24.8684	3	501.918	1502.73	0.1217	66.98		False
F1SS64	FMNVKHWPWMKL	825	836	8186	28.5112	3	539.613	1615.82	0.0970535	43.43		False
F1SS64	MNVKHWPWMK	826	835	5421	21.0173	3	452.894	1355.66	-1.11074	39.56		False
F1SS64	MNVKHWPWMKL	826	836	9951	25.4586	3	490.589	1468.75	-1.01597	37.16		False
F1SS64	NVKHWPWMK	827	835	2146	18.0419	3	409.214	1224.62	-1.04511	30.81		False
F1SS64	NVKHWPWMKL	827	836	2186	23.1219	3	446.909	1337.71	-0.980123	40.43		False
F1SS64	FFKIKPL	837	843	10768	22.4847	2	446.786	891.557	-1.21595	17.5		False
F1SS64	KEEFQKTKDELAKSEAKRKELEEKM	857	881	3801	16.1367	4	764.151	3052.58	0.0530986	64.53	[5] Deamidated (NQ)	False
F1SS64	IKTKIQL	913	919	877	15.1707	2	422.286	842.557	-2.24515	22.58		False
F1SS64	EAKIKEVTERAEDE	920	933	8017	13.3358	3	549.612	1645.81	-1.6303	65.35		False
F1SS64	EAKIKEVTERAEDEEEIN	920	937	7297	17.5612	2	1066.52	2131.03	-0.453299	34.64		False
F1SS64	AKVEKEKHATENKVKNLTEE	966	985	6969	10.4827	3	775.751	2324.23	-1.38106	86.22		False
F1SS64	MAGLDETIAKL	986	996	7091	29.5141	2	581.313	1160.61	0.465792	58.77		False
F1SS64	AGLDETIAKL	987	996	7643	26.8037	2	515.792	1029.57	-1.13662	40		False
F1SS64	QAEEDKVNTLTKAKTKL	1015	1031	4131	14.4829	4	480.021	1916.05	-1.51766	81.34		False
F1SS64	DKVNTLTKAKTKL	1019	1031	10475	11.8863	4	365.726	1458.87	-1.69893	41.91		False
F1SS64	EQQVDDLEGSLEQEKKLRM	1032	1050	6603	23.7279	4	569.536	2274.12	-0.194761	98.93		False
F1SS64	EQQVDDLEGSLEQEKKLRMDL	1032	1052	4125	27.3767	4	626.564	2502.23	-0.0117396	110.76		False
F1SS64	EGSLEQEKKLRMDL	1039	1052	5707	19.1181	3	559.294	1674.86	-0.811836	55.73		False
F1SS64	LEEEIEAERASRAKAEKQRSDL	1122	1143	4343	14.5698	4	640.334	2557.31	-1.36205	35.73		False
F1SS64	EEEIEAERASRAKAEKQRSDL	1123	1143	10091	12.4284	4	612.063	2444.22	-0.449394	63.91		False
F1SS64	EIEAERASRAKAEKQRSDL	1125	1143	10139	11.3163	4	547.542	2186.14	-0.342356	18.66		False
F1SS64	IEMNKKREAEF	1165	1175	7251	12.4022	2	697.858	1393.7	-0.883817	26.51		False
F1SS64	IEMNKKREAEFQKMRRDLE	1165	1183	8098	16.0301	5	491.057	2450.25	-1.52747	23.37		False
F1SS64	IEMNKKREAEFQKMRRDLEE	1165	1184	1074	16.7436	5	516.866	2579.29	-1.09315	35.78		False
F1SS64	ATLQHEATAAALRKKHADSVAEL	1185	1207	8230	16.0478	3	811.106	2430.3	-0.842232	15.14		False
F1SS64	GEQIDNLQRVKQKLEKEKSEM	1208	1228	2046	20.6137	4	633.338	2529.32	-0.22894	44.53		False
F1SS64	ASNMETVSKAKGNL	1236	1249	8688	14.0938	2	725.371	1448.73	-0.867196	89.59		False
F1SS64	ASNMETVSKAKGNLEKM	1236	1252	9004	16.1918	2	919.46	1836.91	-1.21187	111.29		False
F1SS64	NMETVSKAKGNLEKM	1238	1252	6211	15.0442	3	560.619	1678.84	-1.33925	42.31		False
F1SS64	ETVSKAKGNLEKM	1240	1252	6145	11.5255	2	717.884	1433.75	-0.925686	61.7		False
F1SS64	KSKEEEQQRLINDL	1264	1277	9211	17.2071	2	865.456	1728.9	-1.4274	46.37		False
F1SS64	QTESGEFSRQLDEKEAL	1285	1301	6181	20.5235	3	656.316	1965.93	-0.33064	23.3		False
F1SS64	LREQYEEEQESKAEL	1347	1361	2291	16.3061	3	627.633	1879.88	-1.87221	15.28		False
F1SS64	VAQWRTKYETDA	1372	1383	3600	15.2836	2	734.363	1466.71	-2.66604	39.27		False
F1SS64	LEEAKKKLAQRLQ	1390	1402	11054	11.2821	4	389.488	1553.92	-1.28958	59.18		False
F1SS64	LEEAKKKLAQRLQA	1390	1403	11407	12.2099	3	542.661	1624.96	-0.477291	83.62		False
F1SS64	HVEAVNAKCASL	1407	1418	2416	15.1707	2	621.318	1240.62	-0.963227	44.46		False
F1SS64	EKTKQRLQNEVEDL	1419	1432	2849	16.0478	2	865.456	1728.9	-1.76153	18.51		False
F1SS64	AALDKKQRNFDKILAE	1444	1459	2068	16.596	3	620.682	1859.02	-1.42254	25.28		False
F1SS64	AEWKQKYEETHAEL	1458	1471	5384	16.5167	2	881.425	1760.83	-1.32193	37.42		False
F1SS64	WKQKYEETHAEL	1460	1471	8185	14.0252	2	781.385	1560.76	-0.860006	27.75		False
F1SS64	EASQKEARSLGTEL	1472	1485	3181	15.8558	2	759.89	1517.77	-2.14191	23.69		False
F1SS64	ETLKRENKNLQQEISDL	1500	1516	2368	21.1243	2	1029.54	2057.07	-1.13402	16.33		False
F1SS64	IAEGGKRIHELEKIKKQVEQEKSEIQ	1520	1545	6049	19.6229	4	762.676	3046.67	-1.02608	15.8		False
F1SS64	AALEEAEASLEHEEGKIL	1546	1563	6463	30.6916	3	646.993	1937.96	-1.09107	65.49		False
F1SS64	EEAEASLEHEEGKI	1549	1562	1028	17.6315	3	524.245	1569.71	-1.7836	69.46		False
F1SS64	EEAEASLEHEEGKIL	1549	1563	1465	22.1064	2	842.406	1682.8	-0.946061	30.96		False
F1SS64	EEAEASLEHEEGKILRIQ	1549	1566	5143	23.5848	4	521.018	2080.04	-0.287672	83.48		False
F1SS64	EEAEASLEHEEGKILRIQL	1549	1567	2913	28.424	4	549.289	2193.13	-0.00518928	110.11		False
F1SS64	EAEASLEHEEGKIL	1550	1563	8175	20.3675	2	777.885	1553.76	-0.884823	34.74		False
F1SS64	ELNQVKSEVDRKIAEKDEE	1568	1586	6794	16.4348	2	1130.08	2258.14	-1.50891	108.42		False
F1SS64	NQVKSEVDRKIAEKDEE	1570	1586	6364	11.8193	4	505.01	2016.01	-1.20136	88.43		False
F1SS64	IDQLKRNHVRVVE	1587	1599	11313	12.1128	3	535.977	1604.91	-0.723283	42.72		False
F1SS64	IDQLKRNHVRVVES	1587	1600	11246	11.853	3	564.987	1691.94	-1.65389	68.73		False
F1SS64	DAEIRSRNDAI	1606	1616	7391	13.3022	3	420.549	1258.63	-0.331434	15.05		False
F1SS64	DAEIRSRNDAIRL	1606	1618	1490	16.8153	3	510.277	1527.81	-1.42745	29.23		False
F1SS64	MEIQLNHA	1629	1636	5284	19.3016	2	478.237	954.459	-0.81191	16.93		False
F1SS64	MEIQLNHANRM	1629	1639	9654	17.718	3	452.888	1355.64	-1.08521	53.66		False
F1SS64	MEIQLNHANRMAA	1629	1641	4406	18.3637	3	500.246	1497.72	-1.76112	64.02		False
F1SS64	MEIQLNHANRMAAE	1629	1642	932	18.5542	3	543.26	1626.76	-0.728544	67.13		False
F1SS64	EIQLNHANRMAAE	1630	1642	6128	15.1707	3	499.58	1495.72	-1.49691	43.53		False
F1SS64	IQLNHANRMAA	1631	1641	4068	13.1308	3	413.551	1237.63	-1.85125	23.19		False
F1SS64	IQLNHANRMAAE	1631	1642	6024	13.4051	2	684.345	1366.67	-1.85306	58.64		False
F1SS64	IQLNHANRMAAEALRN	1631	1646	3750	17.0556	4	456.242	1820.94	-1.38586	101.46		False
F1SS64	YRNTQGILKDTQIHL	1647	1661	1879	21.7124	4	450.749	1798.97	-0.871925	54.94		False
F1SS64	KDTQIHL	1655	1661	4840	13.4051	2	427.739	853.464	-2.22745	18.74		False
F1SS64	KDTQIHLDDALRGQEDL	1655	1671	4148	23.1902	3	656.333	1965.98	1.54533	79		False
F1SS64	DDALRGQEDL	1662	1671	1140	19.0562	2	566.267	1130.52	-1.03796	15.44		False
F1SS64	IEELRATL	1689	1696	5853	21.8012	2	472.774	943.533	-1.24173	20.45		False
F1SS64	RATLEQTERSRKVAEQEL	1693	1710	9237	13.9676	3	715.385	2143.13	-1.20438	22.71		False
F1SS64	EQTERSRKVAEQEL	1697	1710	10605	11.4814	2	851.939	1701.86	-1.0337	31.45		False
F1SS64	INTKKKLETDISQ	1728	1740	7999	11.7844	2	759.429	1516.84	-1.02722	25.07		False
F1SS64	INTKKKLETDISQMQGEM	1728	1745	8202	20.5001	2	1047.53	2093.05	-0.159099	16.17		False
F1SS64	EDILQEARNAEEKAKKAITD	1746	1765	5107	27.4056	4	568.8	2271.17	-0.668622	53.75		False
F1SS64	ILQEARNAEEKAKKAITD	1748	1765	6099	17.9782	5	406.427	2027.1	-1.52662	15.81		False
F1SS64	MAEELKKEQDTSAHL	1769	1783	1180	14.8455	3	577.285	1728.83	-1.56317	130.72		False
F1SS64	MAEELKKEQDTSAHL	1769	1783	10745	14.8121	3	582.616	1744.83	-1.74431	23.43	[1] Oxidation (M)	False
F1SS64	AEELKKEQDTSAHL	1770	1783	9598	12.1417	2	799.904	1597.79	-0.614662	80.86		False
F1SS64	LKKEQDTSAHL	1773	1783	10582	10.152	2	635.343	1268.67	-0.973507	74.76		False
F1SS64	LALKGGKKQIQKLE	1807	1820	11101	12.2099	2	777.49	1552.97	-0.742588	44.61		False
F1SS64	LALKGGKKQIQKLEA	1807	1821	6301	12.8742	2	813.008	1624	-1.32027	25.01		False
F1SS64	ALKGGKKQIQKLEA	1808	1821	10400	10.5817	2	756.466	1510.92	-1.38154	24.89		False
F1SS64	LTYQTEEDRKNI	1854	1865	6134	14.6613	3	503.922	1508.74	-1.9742	48.86		False
F1SS64	LTYQTEEDRKNIL	1854	1866	3771	18.7728	3	541.617	1621.83	-0.743459	49.54		False
F1SS64	LTYQTEEDRKNILR	1854	1867	10889	15.5221	3	593.65	1777.93	-1.82698	76.14		False
F1SS64	LTYQTEEDRKNILRL	1854	1868	3434	21.0583	4	473.761	1891.02	0.181215	54		False
F1SS64	TEEDRKNILRL	1858	1868	8305	16.6852	4	347.447	1385.76	-2.14071	32.3		False
F1SS64	QDLVDKL	1869	1875	1253	21.1909	2	415.734	829.453	-1.94608	13.07		False
F1SS64	QDLVDKLQAKVKS	1869	1881	8570	19.4629	4	368.717	1470.84	-1.75585	40.22		False
F1SS64	QDLVDKLQAKVKSYKRQAEE	1869	1888	8492	21.287	5	476.063	2375.28	0.0101003	27.03		False
F1SS64	VDKLQAKVKSYKRQAEE	1872	1888	8148	11.3854	3	674.043	2019.11	-2.70208	23.18		False
Troponin I1, slow skeletal type OS=Sus scrofa GN=TNNI1 PE=1 SV=1
Accession	peptide sequence	Start_pos	end_pos	progenesis peptide number	Retention time (min)	Charge	m/z	Measured mass	Mass error (ppm)	Score	Modifications	Use in quantitation
I3LB76	LAERIPTL	45	52	1356	23.954	2	456.779	911.543	-0.985213	20.72		True
I3LB76	LAERIPTLQTRG	45	56	1430	18.62	3	452.264	1353.77	-1.26081	85.92		True
I3LB76	LAERIPTLQTRGLSL	45	59	1083	27.1926	3	556.665	1666.97	-0.789201	65.1		True
I3LB76	AERIPTLQTRGLSL	46	59	3160	25.2697	3	518.97	1553.89	-0.0231194	34.56		False
I3LB76	AMSGMEGRKKMFDAAKSPTSQ	167	187	9247	14.6829	4	565.273	2257.06	-0.241257	52.51		True
I3LB76	MSGMEGRKKMFDAAKSPTSQ	168	187	5999	14.2492	4	547.514	2186.03	-0.787022	62.62		True
L-lactate dehydrogenase A chain OS=Sus scrofa GN=LDHA PE=1 SV=3
Accession	peptide sequence	Start_pos	end_pos	progenesis peptide number	Retention time (min)	Charge	m/z	Measured mass	Mass error (ppm)	Score	Modifications	Use in quantitation
P00339	LVDVMEDKLKGEM	50	62	10918	24.4107	3	502.922	1505.75	-0.820298	88.13		True
P00339	VDVMEDKLKGEM	51	62	1241	20.7728	2	697.338	1392.66	-0.476226	75.88		True
P00339	VDVMEDKLKGEMM	51	63	1917	23.3958	3	508.908	1523.7	-0.0132197	77.35		True
P00339	VMEDKLKGEM	53	62	2464	15.5417	3	393.862	1178.56	-4.01484	13.03		True
P00339	MDLQHGSLF	63	71	314	28.8916	2	524.25	1046.49	-0.0829526	13.59		False
P00339	FLRTPKIVSGKD	71	82	1915	15.3552	4	340.953	1359.78	-1.9337	13.02		True
P00339	FLRTPKIVSGKDYNVTANSRL	71	91	3693	20.5001	4	595.584	2378.31	-0.425581	68.02		True
P00339	LRTPKIVSGKDYNVTANSRL	72	91	1025	18.5969	4	558.817	2231.24	0.787614	51.23		True
P00339	YNVTANSRL	83	91	400	16.8153	2	519.272	1036.53	-1.02152	22.17		True
P00339	VVITAGARQQEGESRL	92	107	434	15.8812	3	571.979	1712.92	-1.09592	31.15		False
P00339	VVITAGARQQEGESRLN	92	108	9546	14.6829	3	609.993	1826.96	-1.72638	48.12		True
P00339	VVITAGARQQEGESRLNL	92	109	623	20.2458	3	647.688	1940.04	-0.785666	84.35		True
P00339	KFIIPNIVKYSPNCKL	118	133	6164	28.3985	3	626.362	1876.06	-0.294235	60.07		True
P00339	IIPNIVKYSPNCKL	120	133	2056	26.2542	3	534.641	1600.9	-0.0304601	36.43		True
P00339	VAWKISGFPKNRVIGSG	146	162	7344	23.2117	4	454.761	1815.01	-0.817595	55.26		True
P00339	ERLGVHPLSCHG	176	187	4195	14.0938	4	326.918	1303.64	-1.78836	49.45		True
P00339	VAGVSLKNLHPEL	206	218	4407	24.3207	2	688.898	1375.78	-1.31991	59.78		True
P00339	VIKLKGYTSW	241	250	9978	22.0876	2	597.847	1193.68	-0.533339	29.24		True
P00339	MIKGLYGIKE	276	285	1533	19.3763	2	576.328	1150.64	-0.843835	17.3		True
P00339	IKGLYGIKEDVF	277	288	5871	26.4169	2	691.389	1380.76	-0.63454	18.49		True
P00339	LSVPCILGQNGISDV	289	303	6131	38.1684	2	757.897	1513.78	-0.672818	14.59		True
P00339	VVKVTLTPEE	303	312	391	20.1496	2	557.821	1113.63	-0.370056	20.68		True
P00339	VVKVTLTPEEEAHL	303	316	1093	22.6026	3	522.291	1563.85	0.00474245	55.28		True
P00339	VVKVTLTPEEEAHLKKSADTL	303	323	598	21.1243	4	577.824	2307.27	-0.99714	75.36		True
P00339	VVKVTLTPEEEAHLKKSADTLWGIQKE	303	329	4079	26.2542	5	610.737	3048.65	-0.412503	77.38		True
P00339	VKVTLTPEEEAHL	304	316	11131	21.3973	3	489.268	1464.78	-1.02017	18.02		True
P00339	VKVTLTPEEEAHLKKSADTL	304	323	2740	20.0644	4	553.057	2208.2	-0.828589	58.37		True
Glyceraldehyde-3-phosphate dehydrogenase OS=Sus scrofa GN=GAPDH PE=1 SV=4
Accession	peptide sequence	Start_pos	end_pos	progenesis peptide number	Retention time (min)	Charge	m/z	Measured mass	Mass error (ppm)	Score	Modifications	Use in quantitation
P00355	VKVGVNGFGRIGR	2	14	1954	16.9765	4	340.455	1357.79	-2.1302	43.98		True
P00355	VKVGVNGFGRIGRL	2	15	642	20.9562	3	491.3	1470.88	-0.736176	18.48		True
P00355	VKVGVNGFGRIGRL	2	15	4386	22.8857	4	368.972	1471.86	-1.675	27.47	[6] Deamidated (NQ)	True
P00355	VKVGVNGFGRIGRLVT	2	17	2360	22.8857	4	418.755	1670.99	-0.97238	91.74		True
P00355	VAINDPFIDLHY	29	40	5994	34.4935	2	708.861	1415.71	-0.721883	109.88		True
P00355	INDPFIDLHY	31	40	300	32.6093	2	623.809	1245.6	0.396488	76.81		True
P00355	FQYDSTHGKFHGTVKAENGKL	45	65	4236	14.5698	3	788.728	2363.16	-1.96026	131.95		True
P00355	FQYDSTHGKFHGTVKAENGKL	45	65	1988	15.3217	5	473.837	2364.15	-1.34846	58.95	[18] Deamidated (NQ)	True
P00355	FQYDSTHGKFHGTVKAENGKLVINGKA	45	71	8247	17.3396	5	590.109	2945.51	-1.50931	70.91		True
P00355	IFQERDPAN	74	82	9752	14.0601	2	545.27	1088.52	-0.219989	18.52		True
P00355	QERDPANIKWGDAGATY	76	92	784	21.5945	2	946.449	1890.88	-0.92061	17.19		True
P00355	ERDPANIKWGDAGATY	77	92	5567	21.7124	2	882.42	1762.83	-1.23628	19.08		True
P00355	PANIKWGDAGATY	80	92	1539	22.9301	2	682.335	1362.66	-0.527949	37.48		True
P00355	TTMEKAGAHL	101	110	11410	11.9552	3	353.515	1057.52	0.205534	24.34		True
P00355	VMGVNHEKYDNS	130	141	8084	11.8863	2	696.814	1391.61	-1.04761	38.17		True
P00355	VMGVNHEKYDNSL	130	142	35	16.4589	3	502.573	1504.7	-1.02411	47.88		True
P00355	VMGVNHEKYDNSL	130	142	2498	16.4784	3	507.904	1520.69	-2.45981	---	[2] Oxidation (M)	True
P00355	VMGVNHEKYDNSL	130	142	9246	16.4589	2	761.352	1520.69	-2.15346	34.04	[2] Oxidation (M)	True
P00355	LAPLAKVIHDHF	155	166	5432	24.368	3	454.262	1359.77	-0.942363	103.75		True
P00355	APLAKVIHDHF	156	166	1967	19.1006	3	416.568	1246.68	-0.45839	86.91		True
P00355	GLMTTVHAITATQKTVDGPSGKL	171	193	9097	24.1173	4	582.316	2325.24	0.132137	31.17		True
P00355	MTTVHAITATQKTVDGPSGKL	173	193	1603	18.1926	3	719.383	2155.13	-1.77685	167.46		True
P00355	TTVHAITATQKTVDGPSGKL	174	193	4200	16.1918	2	1013.05	2024.09	-1.55384	117.63		True
P00355	TVHAITATQKTVDGPSGKL	175	193	6120	15.4923	2	962.528	1923.04	-0.930258	101.19		True
P00355	HAITATQKTVDGPSGKL	177	193	9028	13.1643	3	575.316	1722.93	-0.84701	56.85		True
P00355	ITATQKTVDGPSGKL	179	193	7417	14.3925	3	505.95	1514.83	-1.32182	91.39		True
P00355	ATQKTVDGPSGKL	181	193	4665	11.853	2	651.356	1300.7	-1.19606	72.48		True
P00355	TQKTVDGPSGKL	182	193	7095	11.7223	3	410.894	1229.66	-1.35387	62.02		True
P00355	NIIPASTGAAKAVG	203	216	668	19.1863	2	635.362	1268.71	0.290343	22.08		False
P00355	NIIPASTGAAKAVGKVIPEL	203	222	6855	29.7938	2	975.074	1948.13	-1.31039	26.18		False
P00355	NIIPASTGAAKAVGKVIPELNG	203	224	5274	28.8916	3	707.407	2119.2	-0.74623	70.14		True
P00355	NIIPASTGAAKAVGKVIPELNGKL	203	226	9952	29.2735	3	787.799	2360.38	-1.05378	147.32		True
P00355	NIIPASTGAAKAVGKVIPELNGKLTGMA	203	230	1960	30.5532	4	681.138	2720.52	-0.92614	57.43		True
P00355	NIIPASTGAAKAVGKVIPELNGKLTGMA	203	230	8308	30.521	3	908.183	2721.53	6.0845	44.76	[1] Deamidated (NQ)	True
P00355	NIIPASTGAAKAVGKVIPELNGKLTGMA	203	230	10650	29.009	4	685.137	2736.52	-0.774343	29.98	[27] Oxidation (M)	True
P00355	NIIPASTGAAKAVGKVIPELNGKLTGMA	203	230	10974	31.5412	4	681.385	2721.51	-0.0472766	18.94	[21] Deamidated (NQ)	True
P00355	KVIPELNGKLTGMA	217	230	1148	22.9997	2	735.92	1469.83	-0.894756	46.41		True
P00355	MAFRVPTPNVSV	229	240	4300	29.1957	2	659.353	1316.69	-0.291981	14.01		False
P00355	DFNSDTHSSTF	283	293	4222	19.7905	2	629.254	1256.49	-1.40686	21.17		False
P00355	DFNSDTHSSTFDAGAGIALNDHF	283	305	6607	30.4904	3	813.687	2438.04	-0.639814	65.69		False
P00355	FNSDTHSSTF	284	293	7342	15.2836	2	571.74	1141.47	-1.95758	18.12		False
P00355	FNSDTHSSTFDAGAGIALNDHF	284	305	4949	27.9003	3	775.344	2323.01	-1.85873	50.65		False
P00355	NSDTHSSTFDAGAGIALNDHF	285	305	4875	26.8497	2	1088.98	2175.94	-1.01192	166.47		False
P00355	FDAGAGIALNDHF	293	305	1991	29.3625	2	674.32	1346.63	-0.328719	114.17		False
P00355	DAGAGIALNDHF	294	305	927	26.6379	2	600.786	1199.56	-0.49189	91.02		False
P00355	IALNDHF	299	305	8	21.9967	2	415.214	828.412	-0.653792	29.46		False
P00355	IALNDHFVKL	299	308	4800	24.663	3	390.56	1168.66	-1.67978	29.13		False
P00355	FGYSNRVVDL	316	325	62	25.3999	2	585.301	1168.59	0.0502411	23.9		False
P00355	LMVHMASKE	325	333	5335	13.3358	3	349.176	1044.51	-1.97223	21.44		False
P00355	MVHMASKE	326	333	10922	10.0279	3	311.482	931.424	-1.7665	31.33		False
Aspartate aminotransferase, cytoplasmic OS=Sus scrofa GN=GOT1 PE=1 SV=3
Accession	peptide sequence	Start_pos	end_pos	progenesis peptide number	Retention time (min)	Charge	m/z	Measured mass	Mass error (ppm)	Score	Modifications	Use in quantitation
P00503	FSFTGLNPKQVEY	361	373	4539	29.7313	2	765.385	1528.76	-0.639068	33.92		True
P00503	VSSPTWENHNGVF	136	148	2634	24.6001	2	737.341	1472.67	-0.643109	70.23		True
Adenylate kinase isoenzyme 1 OS=Sus scrofa GN=AK1 PE=1 SV=1
Accession	peptide sequence	Start_pos	end_pos	progenesis peptide number	Retention time (min)	Charge	m/z	Measured mass	Mass error (ppm)	Score	Modifications	Use in quantitation
P00571	VAKVDTSKGFL	81	91	758	18.0214	3	388.891	1163.65	-2.23176	37.86		True
P00571	VAKVDTSKGFLIDGYPREVKQGEE	81	104	6370	20.8173	5	533.882	2664.37	-0.58634	42.65		True
P00571	SQVCTHL	184	190	8447	14.183	2	394.192	786.369	-0.970336	15		True
P00571	SQVCTHLDTLK	184	194	4643	15.7382	3	415.547	1243.62	-2.2651	47.34		True
Citrate synthase, mitochondrial OS=Sus scrofa GN=CS PE=1 SV=2
Accession	peptide sequence	Start_pos	end_pos	progenesis peptide number	Retention time (min)	Charge	m/z	Measured mass	Mass error (ppm)	Score	Modifications	Use in quantitation
P00889	ASASSTNLKDIL	26	37	6676	24.1965	2	610.33	1218.65	0.568463	19.68		True
P00889	ADLIPKEQARIKT	38	50	9356	15.9265	4	371.471	1481.85	-1.53252	21.61		True
Myoglobin OS=Sus scrofa GN=MB PE=1 SV=2
Accession	peptide sequence	Start_pos	end_pos	progenesis peptide number	Retention time (min)	Charge	m/z	Measured mass	Mass error (ppm)	Score	Modifications	Use in quantitation
P02189	NVWGKVEADVAGHGQEVL	13	30	2920	28.2273	2	954.483	1906.95	-0.758823	60.72		True
P02189	FKGHPETL	34	41	7290	12.0216	2	464.748	927.481	-0.567597	14.31		True
P02189	FKGHPETLEKFDKFKHLKSEDE	34	55	3825	16.5577	4	673.096	2688.36	0.334567	43.51		False
P02189	MKASEDLKKHGNTVL	56	70	9495	12.496	3	557.634	1669.88	-1.8306	19.33		True
P02189	KASEDLKKHGNTVL	57	70	9015	11.0906	2	770.428	1538.84	-0.0677576	34.52		True
P02189	TPLAQSHATKHKIPVKY	88	104	11433	12.0216	3	640.367	1918.08	-0.336471	88.56		True
P02189	AIIQVLQSKHPGDFGAD	111	127	7276	25.4586	3	599.316	1794.93	0.273589	31.43		True
P02189	AIIQVLQSKHPGDFGADAQGAMSKA	111	135	4133	25.0753	4	635.828	2539.28	-0.896009	15.11		True
P02189	VLQSKHPGDFGADAQGAMSKA	115	135	5259	17.3852	3	705.68	2114.02	-1.00713	175		True
P02189	QSKHPGDFGADAQGAMSKA	117	135	4668	15.3552	2	951.94	1901.87	-1.38804	120.86		True
P02189	FRNDMAAKYKELGF	139	152	8342	23.3493	3	563.952	1688.83	-0.753796	18.32		True
P02189	FRNDMAAKYKELGFQG	139	154	3349	21.7794	2	937.963	1873.91	-1.3533	35.61		True
Desmin OS=Sus scrofa GN=DES PE=1 SV=4
Accession	peptide sequence	Start_pos	end_pos	progenesis peptide number	Retention time (min)	Charge	m/z	Measured mass	Mass error (ppm)	Score	Modifications	Use in quantitation
P02540	AAEVNRLKGREPTRVAE	138	154	8884	11.8193	4	474.765	1895.03	-1.32094	59.56		True
P02540	FRADVDAATL	212	221	5997	22.6219	2	539.78	1077.54	-0.477693	33.94		True
P02540	ASEASGYQDNIARL	358	371	3609	22.1315	2	747.862	1493.71	-0.39953	119.33		True
Polyubiquitin-C OS=Sus scrofa GN=UBC PE=2 SV=1
Accession	peptide sequence	Start_pos	end_pos	progenesis peptide number	Retention time (min)	Charge	m/z	Measured mass	Mass error (ppm)	Score	Modifications	Use in quantitation
P0CG68	VKTLTGKTITL	5	15	2154	19.5556	2	587.873	1173.73	-0.894518	24.58		True
P0CG68	IFAGKQLEDGRTLSD	44	58	10800	19.1389	3	550.621	1648.84	0.186035	33.59		True
P0CG68	AGKQLEDGRTLSD	46	58	8726	12.0216	3	463.904	1388.69	-0.439206	25.64		True
P0CG68	AGKQLEDGRTLSDYNIQKESTLHL	46	69	6249	22.6636	5	544.284	2716.38	6.34217	19.99	[4] Deamidated (NQ)	True
Sarcoplasmic/endoplasmic reticulum calcium ATPase 2 OS=Sus scrofa GN=ATP2A2 PE=1 SV=1
Accession	peptide sequence	Start_pos	end_pos	progenesis peptide number	Retention time (min)	Charge	m/z	Measured mass	Mass error (ppm)	Score	Modifications	Use in quantitation
P11607	IAVGDKVPADIRL	153	165	1534	24.5114	3	456.272	1365.8	-1.92592	67.21		True
P11607	NEAKGVYEKVGEATE	428	442	11412	15.2259	2	812.396	1622.78	-0.911997	63.7		False
P11607	FARVEPSHKSKIVE	675	688	8800	11.5314	4	407.479	1625.89	-1.42882	40.44		False
P11607	AMTGDGVNDAPALKKSEIG	698	716	5557	18.4075	3	625.314	1872.92	-2.81332	88.89		True
P11607	AVEEGRAIYNNMKQ	745	758	4257	15.6298	3	541.603	1621.79	-1.46586	34.12		False
P11607	VTDGLPATALGFNPPDL	797	813	2665	39.5602	2	849.44	1696.87	-0.636889	13.22		False
P11607	VTDGLPATALGFNPPDLD	797	814	5321	38.5938	2	906.953	1811.89	-1.25571	18.83		False
Troponin C, slow skeletal and cardiac muscles OS=Sus scrofa GN=TNNC1 PE=1 SV=1
Accession	peptide sequence	Start_pos	end_pos	progenesis peptide number	Retention time (min)	Charge	m/z	Measured mass	Mass error (ppm)	Score	Modifications	Use in quantitation
P63317	TEEQKNEFKAAF	13	24	7241	17.6769	2	721.352	1440.69	0.648551	22.73		True
P63317	ISTKELGKVMR	36	46	11216	15.1707	4	316.188	1260.72	-0.80751	78.08		True
P63317	ISTKELGKVMRM	36	47	6991	20.2177	3	464.928	1391.76	-1.1421	86.42		True
P63317	LEFMKGVE	154	161	832	23.3493	2	476.744	951.473	-0.127053	15.76		True
Actin, alpha skeletal muscle OS=Sus scrofa GN=ACTA1 PE=3 SV=1
Accession	peptide sequence	Start_pos	end_pos	progenesis peptide number	Retention time (min)	Charge	m/z	Measured mass	Mass error (ppm)	Score	Modifications	Use in quantitation
P68137	LVCDNGSGLVKAGF	10	23	1828	26.5794	2	690.353	1378.69	-0.265869	98.42		False
P68137	LVCDNGSGLVKAGFAGDDAPRAVF	10	33	6902	29.6379	3	793.729	2378.17	-1.42894	208.51		False
P68137	VCDNGSGLVKAGF	11	23	46	23.1219	2	633.811	1265.61	-0.563366	109.59		False
P68137	VCDNGSGLVKAGF	11	23	7432	25.4868	2	634.303	1266.59	0.79376	71.64	[4] Deamidated (NQ)	False
P68137	VCDNGSGLVKAGFAGDDAPR	11	30	7020	20.6376	3	650.311	1947.91	-0.074724	209.06		False
P68137	VCDNGSGLVKAGFAGDDAPRAV	11	32	5204	23.1698	3	707.012	2118.01	-1.45428	228.13		False
P68137	VCDNGSGLVKAGFAGDDAPRAVF	11	33	160	27.7693	3	756.035	2265.08	-0.421943	213.04		False
P68137	VCDNGSGLVKAGFAGDDAPRAVF	11	33	10963	29.7021	3	756.365	2266.07	2.34864	126.02	[4] Deamidated (NQ)	False
P68137	DNGSGLVKAGFAGDDAPRAVF	13	33	4163	28.1154	3	688.676	2063.01	-0.211216	156.35		False
P68137	LVKAGFAGDDAPRAVF	18	33	9104	23.5614	2	817.438	1632.86	-0.476354	90.47		False
P68137	VKAGFAGDDAPRA	19	31	7835	13.3358	3	425.554	1273.64	-1.35529	31.99		False
P68137	VKAGFAGDDAPRAV	19	32	2164	15.9057	3	458.576	1372.71	-1.9298	33.44		False
P68137	VKAGFAGDDAPRAVF	19	33	133	21.8433	2	760.896	1519.78	-1.21264	83.61		False
P68137	AGFAGDDAPRAVF	21	33	3739	25.5156	2	647.314	1292.61	-0.457353	82.57		False
P68137	GFAGDDAPRAVF	22	33	10267	24.9642	2	611.796	1221.58	-0.37845	23.45		False
P68137	AGDDAPRAVF	24	33	3	19.4175	2	509.752	1017.49	0.528951	33.68		False
P68137	DDAPRAVF	26	33	441	20.7728	2	445.722	889.429	-0.695885	19.48		False
P68137	PSIVGRPRHQGVM	34	46	413	12.496	3	478.598	1432.77	-0.396173	31.34		False
P68137	PSIVGRPRHQGVM	34	46	6779	10.8496	3	483.929	1448.77	-1.04475	19.87	[13] Oxidation (M)	False
P68137	PSIVGRPRHQGVMVG	34	48	2072	13.8918	3	530.628	1588.86	-0.641394	16.3		False
P68137	VGMGQKDSY	47	55	4794	12.813	2	492.726	983.437	-1.47493	29.67		False
P68137	VGMGQKDSYVGDE	47	59	2265	16.1634	2	692.805	1383.6	-1.7993	25.49		False
P68137	VGMGQKDSYVGDEAQSKRGIL	47	67	12	18.5342	4	560.285	2237.11	-0.503594	211.79		False
P68137	VGMGQKDSYVGDEAQSKRGIL	47	67	1616	16.577	4	564.283	2253.1	-1.74397	126.74	[3] Oxidation (M)	False
P68137	VGMGQKDSYVGDEAQSKRGIL	47	67	3573	19.2102	3	747.039	2238.1	0.0861756	30.81	[5] Deamidated (NQ)	False
P68137	VGMGQKDSYVGDEAQSKRGILT	47	68	9	18.0896	4	585.547	2338.16	0.112518	149.42		False
P68137	VGMGQKDSYVGDEAQSKRGILT	47	68	1155	16.1634	4	589.545	2354.15	-1.67918	162.68	[3] Oxidation (M)	False
P68137	VGMGQKDSYVGDEAQSKRGILT	47	68	3254	18.7521	3	780.721	2339.14	-0.347568	70.54	[15] Deamidated (NQ)	False
P68137	VGMGQKDSYVGDEAQSKRGILTL	47	69	11119	22.8381	4	613.817	2451.24	-1.41827	142.96		False
P68137	MGQKDSYVGDEAQSKRGIL	49	67	4137	16.9515	2	1041.52	2081.02	-1.12826	114.5		False
P68137	MGQKDSYVGDEAQSKRGIL	49	67	10881	16.9765	4	525.26	2097.01	-1.76518	67.81	[1] Oxidation (M)	False
P68137	MGQKDSYVGDEAQSKRGILT	49	68	4701	16.5167	2	1092.04	2182.07	-1.01015	128.27		False
P68137	MGQKDSYVGDEAQSKRGILT	49	68	9200	16.4784	4	550.522	2198.06	-2.51704	21.55	[1] Oxidation (M)	False
P68137	GQKDSYVGDEAQSKRGIL	50	67	2737	16.0301	4	488.502	1949.98	-1.36395	48.61		False
P68137	GQKDSYVGDEAQSKRGILT	50	68	5141	15.6469	3	684.682	2051.02	-1.7376	116.28		False
P68137	VGDEAQSKRGIL	56	67	2137	13.6948	3	424.901	1271.68	-2.03043	41.3		False
P68137	VGDEAQSKRGIL	56	67	4802	13.6948	2	636.848	1271.68	-1.71313	41.26		False
P68137	VGDEAQSKRGILT	56	68	2774	13.3358	3	458.583	1372.73	-1.93494	61.3		False
P68137	TNWDDMEKIWHHTF	79	92	5001	31.3299	4	465.71	1858.81	-0.257876	72.2		False
P68137	NWDDMEKIWHHTF	80	92	6078	31.2803	3	586.928	1757.76	-0.288954	70.42		False
P68137	NWDDMEKIWHHTFYNE	80	95	8246	33.1709	3	722.31	2163.91	-0.62908	27.65		False
P68137	WDDMEKIWHHTF	81	92	5137	28.0834	4	411.937	1643.72	-0.869113	39.8		False
P68137	DDMEKIWHHTF	82	92	6868	24.708	2	729.827	1457.64	-0.3487	31.85		False
P68137	MEKIWHHTF	84	92	7574	16.6445	2	614.799	1227.58	-1.47458	32.32		False
P68137	EKIWHHTFYNE	85	95	1593	16.7258	2	752.353	1502.69	-2.22432	20.21		False
P68137	YNELRVAPEEHPTL	93	106	867	21.3545	3	556.618	1666.83	-0.0476959	37		False
P68137	NELRVAPEEHPTL	94	106	2280	19.4175	3	502.261	1503.76	-3.72852	19.03		False
P68137	LTEAPLNPKANRE	107	119	11284	13.4051	3	484.931	1451.77	-1.37171	54.65		False
P68137	LTEAPLNPKANREKM	107	121	5730	13.4702	3	571.309	1710.91	-1.18695	76.7		False
P68137	LTEAPLNPKANREKMTQ	107	123	415	13.5677	4	486.011	1940.01	-0.442927	62.1		False
P68137	LTEAPLNPKANREKMTQ	107	123	4818	13.5677	3	653.009	1956	-3.01576	59.18	[15] Oxidation (M)	False
P68137	LTEAPLNPKANREKMTQIM	107	125	24	19.88	4	547.043	2184.14	1.04422	13.32		False
P68137	LTEAPLNPKANREKMTQIM	107	125	2700	16.8833	4	551.04	2200.13	-1.89397	16.85	[19] Oxidation (M)	False
P68137	LTEAPLNPKANREKMTQIM	107	125	8130	20.5001	3	729.382	2185.12	0.525465	14.18	[17] Deamidated (NQ)	False
P68137	LTEAPLNPKANREKMTQIMF	107	126	1287	23.9992	3	778.076	2331.21	-1.06068	26.2		False
P68137	TEAPLNPKANREKMTQ	108	123	4487	11.8193	3	609.984	1826.93	-0.774453	73.54		False
P68137	TEAPLNPKANREKMTQ	108	123	10664	11.8193	3	615.315	1842.92	-0.992613	34.5	[14] Oxidation (M)	False
P68137	TEAPLNPKANREKMTQIM	108	125	6037	18.1667	2	1036.53	2071.05	-0.873799	41.04		False
P68137	VTTAEREIVRDIKEKL	108	126	3478	23.6069	4	475.777	1899.08	-0.0189204	20.82		False
P68137	IVLDSGDGVTHNVPIYE	153	169	489	27.6389	2	914.46	1826.9	-0.101433	33.51		False
P68137	IVLDSGDGVTHNVPIYEG	153	170	85	27.5099	2	942.97	1883.92	-0.945785	21.65		False
P68137	DSGDGVTHNVPIYEGYALPHAIM	156	178	2785	32.4993	3	819.389	2455.14	-1.2227	34.84		False
P68137	GYALPHAIMR	170	179	4201	20.1705	2	564.802	1127.59	-1.13335	37.62		False
P68137	GYALPHAIMRL	170	180	5781	26.2542	2	621.345	1240.68	0.111735	43.11		False
P68137	YALPHAIM	171	178	475	21.0583	2	466.239	930.463	-0.174379	13.38	[8] Oxidation (M)	False
P68137	YALPHAIMR	171	179	70	19.7184	3	357.863	1070.57	-1.33851	38.55		False
P68137	YALPHAIMRL	171	180	174	25.8008	3	395.558	1183.65	-1.33887	42.49		False
P68137	YLMKILTERG	190	199	7562	22.1536	3	408.565	1222.67	-0.704778	35.11		False
P68137	LMKILTERG	191	199	505	17.3852	3	354.21	1059.61	-1.87907	20.34		False
P68137	LMKILTERGYS	191	201	5893	20.1084	3	437.576	1309.71	-0.67906	28.15		False
P68137	MKILTERG	192	199	956	13.3358	3	316.516	946.526	-1.5387	34.24		False
P68137	MKILTERGY	192	200	2865	17.0152	3	370.87	1109.59	-1.83584	33.28		False
P68137	MKILTERGYS	192	201	725	16.3061	2	599.317	1196.62	-1.96013	29.44		False
P68137	MKILTERGYSF	192	202	1349	22.9533	2	672.852	1343.69	-0.937414	34.59		False
P68137	KILTERGYS	193	201	9371	12.3031	2	533.798	1065.58	-0.630298	22.45		False
P68137	KILTERGYS	193	201	10020	12.3335	3	356.201	1065.58	-1.17583	---		False
P68137	FVTTAERE	202	209	7336	12.4284	2	476.74	951.466	0.0832061	49.11		False
P68137	VTTAEREIVRD	203	213	5545	12.8402	2	644.846	1287.68	-1.39883	19.37		False
P68137	VTTAEREIVRDIKE	203	216	2475	17.1169	3	553.64	1657.9	-0.189378	39.02		False
P68137	VTTAEREIVRDIKEKLCY	203	220	2639	26.9517	4	542.295	2165.15	-0.891491	22.84		False
P68137	IVRDIKEKL	210	218	6356	13.0035	2	557.353	1112.69	-1.03969	13.49		False
P68137	IVRDIKEKLC	210	219	2482	14.2492	3	406.24	1215.7	-1.48117	24.25		False
P68137	IVRDIKEKLCY	210	220	483	17.0556	3	460.595	1378.76	-1.4579	30.44		False
P68137	IKEKLCY	214	220	4254	13.7631	2	448.748	895.482	-2.08593	13.6		False
P68137	VALDFENEMATAASSSSL	221	238	10362	36.7993	2	921.925	1841.84	-0.149004	16.1		False
P68137	DFENEMATAASSSSL	224	238	5875	33.3207	2	780.329	1558.64	-0.89691	18.53		False
P68137	MATAASSSSLEKS	229	241	3406	12.6416	2	635.302	1268.59	-1.25002	82.77		False
P68137	MATAASSSSLEKS	229	241	11061	12.6753	2	643.3	1284.59	-0.82459	45.69	[1] Oxidation (M)	False
P68137	LEKSYELPDGQ	238	248	5050	18.9199	2	639.813	1277.61	-1.405	28.88		False
P68137	EKSYELPDGQVITIGNER	239	256	4963	27.0843	3	683.347	2047.02	-0.877809	34.75		False
P68137	EKSYELPDGQVITIGNERFRCPET	239	262	4164	28.7709	4	696.093	2780.34	-0.546762	91.44		False
P68137	EKSYELPDGQVITIGNERFRCPETL	239	263	10865	31.101	3	965.483	2893.43	0.127482	62.12		False
P68137	YELPDGQVITIGNER	242	256	5668	29.7938	2	852.432	1702.85	-1.31744	92.35		False
P68137	ITIGNERFRCPET	250	262	4780	21.8233	3	512.592	1534.75	-1.8057	20.55		False
P68137	ITIGNERFRCPETL	250	263	3530	25.6622	3	550.287	1647.84	-0.839058	18.84		False
P68137	IGNERFRCPE	252	261	3397	15.5812	3	407.532	1219.57	-2.39918	31.8		False
P68137	IGNERFRCPET	252	262	261	16.3777	3	441.215	1320.62	-1.53005	19.67		False
P68137	IGNERFRCPETL	252	263	511	21.0793	2	717.861	1433.71	-1.16675	25.98		False
P68137	IGMESAGIHE	269	278	106	18.4264	2	522.245	1042.47	-0.714925	74.45		False
P68137	IGMESAGIHETTY	269	281	45	21.287	2	704.824	1407.63	-0.604694	47.59		False
P68137	IGMESAGIHETTY	269	281	5824	17.1784	2	712.82	1423.63	-2.03826	27.06	[3] Oxidation (M)	False
P68137	IGMESAGIHETTYN	269	282	1055	20.0891	2	761.845	1521.68	-0.605582	55.08		False
P68137	IGMESAGIHETTYNS	269	283	351	19.9978	2	805.361	1608.71	-0.883534	27.33		False
P68137	IGMESAGIHETTYNSIMKC	269	287	6039	25.214	3	695.652	2083.94	-0.996981	147.08		False
P68137	KCDIDIRKDL	286	295	2311	19.2339	2	609.829	1217.64	-0.669313	31.09		False
P68137	KCDIDIRKDLYANN	286	299	1355	20.2876	2	840.921	1679.83	-1.42346	78.65		False
P68137	YANNVMSGGTTMYPGIADRM	296	315	3258	28.6889	2	1074.98	2147.94	0.0322928	145.05		False
P68137	YANNVMSGGTTMYPGIADRMQKEIT	296	320	2147	27.9729	3	916.764	2747.27	-0.551442	84.26		False
P68137	YANNVMSGGTTMYPGIADRMQKEITA	296	321	7902	28.9471	3	940.442	2818.31	-1.27672	76.19		False
P68137	NNVMSGGTTMYPGIADRM	298	315	6369	27.4056	2	957.928	1913.84	-1.1084	144.55		False
P68137	NNVMSGGTTMYPGIADRMQKEIT	298	320	7577	26.9517	3	839.064	2514.17	6.50167	47.1	[2] Deamidated (NQ)	True
P68137	NVMSGGTTMYPGIADRM	299	315	3562	27.4345	2	900.906	1799.8	-1.15411	163.81		True
P68137	NVMSGGTTMYPGIADRMQKEIT	299	320	4512	26.9242	3	800.716	2399.13	-1.22255	73.55		True
P68137	VMSGGTTMYPGIADR	300	314	3330	22.0633	2	778.365	1554.72	-1.00298	128.67		True
P68137	VMSGGTTMYPGIADRM	300	315	125	26.0577	2	843.885	1685.76	-0.739431	133.64		True
P68137	VMSGGTTMYPGIADRM	300	315	7327	26.1035	2	851.882	1701.75	-1.87673	47.94	[8] Oxidation (M)	True
P68137	VMSGGTTMYPGIADRMQKE	300	318	752	21.915	3	691.324	2070.95	-1.02392	120.33		True
P68137	VMSGGTTMYPGIADRMQKEIT	300	320	2310	25.8489	2	1143.55	2285.08	-1.37227	77.77		True
P68137	VMSGGTTMYPGIADRMQKEIT	300	320	7638	25.8255	3	768.032	2301.08	-2.11762	33.47	[8] Oxidation (M)	True
P68137	VMSGGTTMYPGIADRMQKEIT	300	320	8994	24.6873	3	768.033	2301.08	-1.09859	31.8	[2] Oxidation (M)	True
P68137	VMSGGTTMYPGIADRMQKEITA	300	321	940	26.9517	3	786.381	2356.12	-0.842981	75.84		True
P68137	VMSGGTTMYPGIADRMQKEITAL	300	322	2644	32.1986	3	824.075	2469.2	-0.963666	86.35		True
P68137	VMSGGTTMYPGIADRMQKEITALAPST	300	326	6517	33.612	3	942.799	2825.37	-0.75478	14.41		True
P68137	VMSGGTTMYPGIADRMQKEITALAPSTM	300	327	2985	35.316	3	986.479	2956.42	-0.172835	38.32		False
P68137	VMSGGTTMYPGIADRMQKEITALAPSTM	300	327	10081	33.5467	3	991.81	2972.41	-0.783185	33.58	[28] Oxidation (M)	True
P68137	SGGTTMYPGIADRM	302	315	1633	23.954	2	728.831	1455.65	-1.18227	82.36		False
P68137	SGGTTMYPGIADRMQKEIT	302	320	1506	24.2701	3	685.999	2054.97	-0.799151	39.06		False
P68137	SGGTTMYPGIADRMQKEITAL	302	322	6689	31.101	3	747.373	2239.1	0.103613	17.19		False
P68137	SGGTTMYPGIADRMQKEITALAPSTM	302	327	6926	34.4299	3	909.776	2726.31	-0.875535	24.49		False
P68137	PGIADRMQKEIT	309	320	6594	18.1667	2	679.857	1357.7	-1.57251	13.13		False
P68137	QKEITALAPSTM	316	327	154	21.9781	2	645.341	1288.67	-1.00063	26.14		False
P68137	KIKIIAPPERK	328	338	7824	11.8193	4	323.965	1291.83	-1.87792	31.51		False
P68137	KIKIIAPPERKYSV	328	341	2394	15.9452	4	411.256	1640.99	-1.70453	29.74		False
P68137	KIKIIAPPERKYSVW	328	342	2633	20.3073	2	914.545	1827.07	-1.38555	54.23		False
P68137	IIAPPERKYSVW	331	342	10215	22.6026	3	486.941	1457.8	-1.10813	20.37		False
P68137	WITKQEY	358	364	262	17.7803	2	484.247	966.479	-1.8918	17.92		True
P68137	WITKQEYDE	358	366	3107	17.9031	2	606.282	1210.55	-1.5797	13.05		True
P68137	WITKQEYDEAGPSIVHRK	358	375	10723	17.3396	3	719.707	2156.1	-0.59524	130.05		True
P68137	WITKQEYDEAGPSIVHRKC	358	376	7426	18.3018	3	754.044	2259.11	-0.731443	187.6		True
P68137	WITKQEYDEAGPSIVHRKCF	358	377	6884	21.8433	5	482.243	2406.18	-0.848122	43.15		True
P68137	WITKQEYDEAGPSIVHRKCF	358	377	9063	21.8667	4	602.802	2407.18	7.07758	51.03	[5] Deamidated (NQ)	True
P68137	ITKQEYDEAGPSIVHRKC	359	376	6899	13.9676	3	692.017	2073.03	-1.42608	189.96		True
P68137	ITKQEYDEAGPSIVHRKCF	359	377	5951	17.9225	3	741.039	2220.1	-1.8407	188.39		True
P68137	EYDEAGPSIVHRKCF	363	377	8467	18.7303	4	438.461	1749.81	-0.069396	58.87		False
P68137	DEAGPSIVHRKC	365	376	9711	11.7223	3	437.887	1310.64	-0.150617	62.26		False
P68137	DEAGPSIVHRKCF	365	377	1474	16.8153	3	486.909	1457.71	-1.69803	77.49		False
P68137	TEAPLNPKANREKMTQIMF			2794	22.576	3	740.381	2218.12	-0.777865	21.95		False
Myosin-7 OS=Sus scrofa GN=MYH7 PE=2 SV=2
Accession	peptide sequence	Start_pos	end_pos	progenesis peptide number	Retention time (min)	Charge	m/z	Measured mass	Mass error (ppm)	Score	Modifications	Use in quantitation
P79293	AAFGEAAPYLRKSEKER	7	23	5201	15.3552	4	481.507	1922	-1.9463	28.85		False
P79293	AAFGEAAPYLRKSEKERL	7	24	10521	18.64	3	679.369	2035.08	-0.344065	52.79		False
P79293	EAQTRPFDL	25	33	5291	22.9301	2	538.772	1075.53	-0.986039	26.85		False
P79293	EAQTRPFDLKKDVYVPDDKEEF	25	46	2020	24.0718	4	668.082	2668.3	-0.502497	18.61		False
P79293	VKAKILSREGGKVTAETEHGKTVT	47	70	9444	11.8193	4	635.61	2538.41	-1.51896	49.61		False
P79293	VKEDQVLQQNPPKF	71	84	2255	20.0397	3	557.301	1668.88	-0.692966	19.08		False
P79293	VKEDQVLQQNPPKFDKIED	71	89	6574	20.1269	4	568.297	2269.16	0.0927983	24.56		False
P79293	DQVLQQNPPKF	74	84	3079	22.2897	2	657.346	1312.68	-0.822866	34.64		False
P79293	QQNPPKFDKIED	78	89	8659	15.5417	2	729.864	1457.71	-1.06931	34.52		False
P79293	YNLKERY	103	109	5109	13.1308	3	329.174	984.501	-2.07984	23.47		False
P79293	YNLKERYA	103	110	10637	13.3715	3	352.853	1055.54	-1.44366	16.47		False
P79293	YNLKERYASW	103	112	1419	20.2458	2	665.332	1328.65	-1.18184	13.3		False
P79293	ITGESGAGKTVNT	176	188	7506	11.1698	2	617.817	1233.62	-0.926549	21.94		False
P79293	ITGESGAGKTVNTKRVIQ	176	193	11389	12.2099	2	930.02	1858.03	-0.621448	111.36		False
P79293	ITGESGAGKTVNTKRVIQY	176	194	3502	14.9132	2	1011.55	2021.09	-1.82084	145.83		False
P79293	ITGESGAGKTVNTKRVIQYF	176	195	9407	20.4082	3	723.727	2168.16	-0.303008	92.3		False
P79293	AVIAAIGDRSKKEQTPGKGTLED	196	218	8026	15.1707	4	596.824	2383.27	-1.67183	41.11		False
P79293	AAIGDRSKKEQTPGKGTLE	199	217	9889	10.7811	3	662.692	1985.05	-0.578042	36.58		False
P79293	AAIGDRSKKEQTPGKGTLED	199	218	7229	11.0906	4	526.027	2100.08	-0.821983	16.18		False
P79293	QANPALEAFGNAKTVRNDNS	222	241	5204	23.1698	3	707.012	2118.01	7.3748	13.24	[1] Deamidated (NQ)|[3] Deamidated (NQ)	False
P79293	EAFGNAKTVRNDNSSRF	228	244	7913	14.1268	4	478.987	1911.92	-0.0785402	94.06		False
P79293	EAFGNAKTVRNDNSSRFGKF	228	247	11435	16.4589	2	1123.06	2244.1	0.357914	29.2		False
P79293	AFGNAKTVRNDNSSRFGKF	229	247	4422	15.3552	5	424.019	2115.06	-2.24166	27.2		False
P79293	FGNAKTVRNDNSSRFGKF	230	247	1170	14.4829	4	512.012	2044.02	-1.4721	44.45		False
P79293	YQILSNKKPEL	287	297	333	19.1863	3	444.922	1331.74	-0.662993	50.56		False
P79293	QILSNKKPEL	288	297	1971	15.3552	3	390.567	1168.68	-2.79427	36.7		False
P79293	DVLGFTSEEKNSM	337	349	807	26.9752	2	728.834	1455.65	-0.923107	74.7		False
P79293	AIMHFGNMK	355	363	5425	17.32	3	350.173	1047.5	-1.50645	18.87		False
P79293	AIMHFGNMKF	355	364	9212	26.0577	2	598.29	1194.57	-1.83975	15.52		False
P79293	KLKQREEQAEPDGTEEADKSAYL	365	387	10692	14.3925	3	879.1	2634.28	0.0917763	41.68		False
P79293	YATGALAKA	422	430	3807	13.9676	2	433.242	864.469	-1.29917	41.44		False
P79293	YATGALAKAVYEKM	422	435	3305	24.4504	3	505.933	1514.78	-1.19972	64.16		False
P79293	INFTNEKLQQ	478	487	1549	19.5749	2	617.825	1233.63	-0.640925	32.78		False
P79293	TNEKLQQFFNHHM	481	493	4722	21.0378	3	558.6	1672.78	-0.654227	94.41		False
P79293	KLQQFFNHHM	484	493	9228	16.8153	2	665.329	1328.64	-1.13499	19.14		False
P79293	EQEEYKKEGIEWE	497	509	9384	18.7521	2	848.888	1695.76	-0.53365	18.67		False
P79293	YDNHLGKSNNFQKPRNIKGRPEAHF	553	577	8734	13.6948	4	742.631	2966.49	-2.20415	110.93		False
P79293	NIIGWLQKNKDPLNE	589	603	6170	29.1696	2	891.48	1780.95	-0.473526	63.95		False
P79293	YKKSSLKL	609	616	6736	11.1698	2	483.802	965.59	-0.61759	21.49		False
P79293	YKKSSLKLLSNL	609	620	8470	19.9736	2	697.424	1392.83	-0.739496	43.51		False
P79293	FANYAGADTPVEKGKGKAKKGSSF	621	644	8522	12.8742	3	820.095	2457.26	-0.308731	187.51		False
P79293	MTNLRSTHPHF	659	669	6725	13.8918	4	335.918	1339.64	-1.66874	25.68		False
P79293	IIPNETKSPGVIDNPLVMHQ	673	692	4261	25.736	3	734.724	2201.15	-1.15522	122.51		False
P79293	IDSRKGAEKLLGSL	736	749	1712	22.0876	2	743.932	1485.85	-0.818599	27.53		False
P79293	DIDHNQYKFGHTKV	750	763	7731	13.9921	3	567.949	1700.83	-0.989353	29.16		True
P79293	DIDHNQYKFGHTKVF	750	764	3816	18.663	3	616.972	1847.89	-1.22025	24.9		True
P79293	LEEMRDERL	773	781	2179	15.6692	2	595.794	1189.57	-1.72166	24.16		False
P79293	FMSVKNWPWMK	821	831	5034	29.2222	3	485.244	1452.71	2.97714	28.6		False
P79293	FMSVKNWPWMKL	821	832	5654	33.612	3	522.937	1565.79	-0.0288137	60.36		False
P79293	MSVKNWPWMK	822	831	1914	25.588	3	436.219	1305.63	-1.03035	51.87		False
P79293	MSVKNWPWMKL	822	832	1669	30.7484	3	473.914	1418.72	-0.845407	64.55		False
P79293	SVKNWPWMKL	823	832	7298	28.3521	2	644.847	1287.68	-0.625692	42.2		False
P79293	YFKIKPL	833	839	522	20.1084	2	454.783	907.552	-0.900797	22.29		False
P79293	YFKIKPLL	833	840	419	25.0091	2	511.325	1020.64	-1.01572	28.4		False
P79293	YFKIKPLLKSAETEKE	833	848	7106	18.4075	4	481.774	1923.07	-1.70333	111.38		False
P79293	DQLIKNKIQL	906	915	9576	21.8953	3	404.914	1211.72	-1.87707	13.97		False
P79293	AKVEKEKHATENKVKNLTEE	962	981	6969	10.4827	3	775.751	2324.23	-1.38106	86.22		False
P79293	SIMDLENDKQQL	1065	1076	6989	26.1315	2	717.35	1432.69	-0.412704	27.77		False
P79293	RIEDEQALGSQLQKKLKELQA	1093	1113	6696	26.3115	4	607.09	2424.33	-0.521178	58.11		False
P79293	IEMNKKREAEF	1161	1171	7251	12.4022	2	697.858	1393.7	-0.883817	26.51		False
P79293	IEMNKKREAEFQKMRRDLE	1161	1179	8098	16.0301	5	491.057	2450.25	-1.52747	23.37		False
P79293	IEMNKKREAEFQKMRRDLEE	1161	1180	1074	16.7436	5	516.866	2579.29	-1.09315	35.78		False
P79293	ATLQHEATAAALRKKHADSVAEL	1181	1203	8230	16.0478	3	811.106	2430.3	-0.842232	15.14		False
P79293	GEQIDNLQRVKQKLEKEKSEF	1204	1224	3230	22.1793	5	510.077	2545.35	-0.3252	63.52		False
P79293	QRVKQKLEKEKSEF	1211	1224	6487	10.6779	3	593.003	1775.99	-1.10615	14.97		False
P79293	DDVTSNMEQIIKAKANL	1229	1245	1990	31.7375	3	630.659	1888.95	-0.809531	106.77		False
P79293	EQIIKAKANL	1236	1245	1924	15.0442	2	564.342	1126.67	-1.79545	13.87		False
P79293	TQRSVNDLTSQRAKL	1266	1280	6795	14.9467	4	429.988	1715.92	-1.90394	24.26		False
P79293	ISQLTRGKLTYTQQ	1298	1311	4803	16.2483	2	818.953	1635.89	-1.57234	45.11		False
P79293	LREQYEEETEAKAEL	1343	1357	1412	18.3637	3	613.298	1836.87	-1.31967	22.65		False
P79293	QRVLSKANSEVAQWRTKYETD	1358	1378	4455	19.011	4	628.075	2508.27	-0.709137	31.6		False
P79293	QRVLSKANSEVAQWRTKYETDA	1358	1379	1731	19.6896	4	645.834	2579.31	-1.46073	29.4		False
P79293	VAQWRTKYETDA	1368	1379	3600	15.2836	2	734.363	1466.71	-2.66604	39.27		False
P79293	LEEAKKKLAQRLQ	1386	1398	11054	11.2821	4	389.488	1553.92	-1.28958	59.18		False
P79293	LEEAKKKLAQRLQD	1386	1399	9825	11.7844	2	835.482	1668.95	-1.37824	51.99		False
P79293	LEEAKKKLAQRLQDAEE	1386	1402	4941	14.4829	2	1000.04	1998.07	-1.46996	68.34		False
P79293	LEKSRVIF	1386	1402	2401	16.7258	2	496.3	990.585	-1.21812	27.87		False
P79293	AALDKKQRNFDKILAE	1440	1455	2068	16.596	3	620.682	1859.02	-1.42254	25.28		False
P79293	ESSQKEARSLSTEL	1468	1481	1744	16.2483	2	782.893	1563.77	-2.01345	35.91		False
P79293	FKLKNAYEESLEHL	1482	1495	4077	24.1173	3	574.301	1719.88	-0.406479	138.93		False
P79293	FKLKNAYEESLEHLET	1482	1497	2378	24.4504	3	650.997	1949.97	-1.67106	13.2		False
P79293	LTEQLGSSGKTIHE	1512	1525	7060	14.7118	3	500.594	1498.76	-1.89397	13.13		False
P79293	TEQLGSSGKTIHELEKVRKQLEA	1513	1535	2608	21.7124	5	517.084	2580.38	-1.24834	40.79		False
P79293	TEQLGSSGKTIHELEKVRKQLEA	1513	1535	8107	21.7376	3	861.468	2581.38	4.6126	27.56	[3] Deamidated (NQ)	False
P79293	QSALEEAEASLEHEEGKIL	1541	1559	10954	33.7663	3	695.011	2082.01	-0.685415	54.68		False
P79293	EEAEASLEHEEGKI	1545	1558	3556	17.6584	2	785.864	1569.71	-1.62981	57.76		False
P79293	EEAEASLEHEEGKIL	1545	1559	1465	22.1064	2	842.406	1682.8	-0.946061	30.96		False
P79293	EEAEASLEHEEGKILRAQL	1545	1563	3715	25.4868	3	718.034	2151.08	-0.166722	93.47		False
P79293	EAEASLEHEEGKIL	1546	1559	8175	20.3675	2	777.885	1553.76	-0.884823	34.74		False
P79293	MEIQLSHA	1625	1632	1143	19.6896	2	464.731	927.448	-0.82248	18.6		False
P79293	IQLSHANRMAAE	1627	1638	9012	13.5677	3	447.562	1339.66	-2.59164	44.58		False
P79293	IQLDDAVRANDDLKENIA	1655	1672	7546	24.9149	3	671.679	2012.02	-0.772018	18.41		False
P79293	RAVVEQTERSRKLAEQEL	1689	1706	6378	15.0617	3	714.724	2141.15	-2.52396	23.25		False
P79293	VVEQTERSRKLAEQEL	1691	1706	8240	15.0926	2	958.014	1914.01	-1.41632	32.79		False
P79293	INQKKKMEADL	1724	1734	9042	11.0906	2	659.363	1316.71	-0.545264	28.37		False
P79293	AVQECRNAEEKAKKAITD	1744	1761	11079	14.183	4	501.759	2003.01	-2.07431	24.74		False
P79293	MAEELKKEQDTSAHL	1765	1779	1180	14.8455	3	577.285	1728.83	-1.56317	130.72		False
P79293	MAEELKKEQDTSAHL	1765	1779	10745	14.8121	3	582.616	1744.83	-1.74431	23.43	[1] Oxidation (M)	False
P79293	AEELKKEQDTSAHL	1766	1779	9598	12.1417	2	799.904	1597.79	-0.614662	80.86		False
P79293	LKKEQDTSAHL	1769	1779	10582	10.152	2	635.343	1268.67	-0.973507	74.76		False
P79293	IALKGGKKQLQKLE	1803	1816	11101	12.2099	2	777.49	1552.97	-0.742588	44.61		False
P79293	IALKGGKKQLQKLEA	1803	1817	6301	12.8742	2	813.008	1624	-1.32027	25.01		False
P79293	ALKGGKKQLQKLEA	1804	1817	10400	10.5817	2	756.466	1510.92	-1.38154	24.89		False
P79293	LTYQTEEDRKNL	1850	1861	6134	14.6613	3	503.922	1508.74	-1.9742	48.86		False
P79293	LTYQTEEDRKNLL	1850	1862	3771	18.7728	3	541.617	1621.83	-0.743459	49.54		False
P79293	LTYQTEEDRKNLLR	1850	1863	10889	15.5221	3	593.65	1777.93	-1.82698	76.14		False
P79293	LTYQTEEDRKNLLRL	1850	1864	3434	21.0583	4	473.761	1891.02	0.181215	54		False
P79293	TEEDRKNLLRL	1854	1864	8305	16.6852	4	347.447	1385.76	-2.14071	32.3		False
P79293	QDLVDKL	1865	1873	1253	21.1909	2	415.734	829.453	-1.94608	13.07		False
P79293	QDLVDKLQL	1865	1873	1774	28.453	2	536.306	1070.6	0.138299	14.8		False
P79293	RADIAESQVNKLRAKSRDIGTKG	1909	1931	4506	15.2259	5	503.483	2512.38	-1.11904	26.53		False
P79293	RADIAESQVNKLRAKSRDIGTKGLN	1909	1933	3256	17.6584	5	548.909	2739.51	-1.22308	27.51		False
Elongation factor 1-alpha OS=Sus scrofa GN=EEF1A PE=1 SV=1
Accession	peptide sequence	Start_pos	end_pos	progenesis peptide number	Retention time (min)	Charge	m/z	Measured mass	Mass error (ppm)	Score	Modifications	Use in quantitation
Q0PY11	VVIGHVDSGKSTTTGHL	11	27	6220	14.7118	4	427.73	1706.89	-3.08762	91.11		False
Q0PY11	AYTLGVKQ	140	147	7360	15.9974	2	440.25	878.485	-0.96722	13.16		True
Q0PY11	MLEPSANMPWFKG	201	213	10928	31.6837	2	754.356	1506.7	-1.38755	25.01		True
Q0PY11	VIILNHPGQISAG	344	356	3519	22.3514	2	659.877	1317.74	-0.940662	22.79		True
Mitochondrial creatine kinase 2 OS=Sus scrofa GN=CKMT2 PE=1 SV=1
Accession	peptide sequence	Start_pos	end_pos	progenesis peptide number	Retention time (min)	Charge	m/z	Measured mass	Mass error (ppm)	Score	Modifications	Use in quantitation
Q2HYU1	IQTGVDNPGHPFIKT	91	105	8279	19.0777	3	541.954	1622.84	-0.488931	32.02		False
Q2HYU1	IQTGVDNPGHPFIKTVG	91	107	8777	20.3675	3	593.985	1778.93	0.777342	19.98		False
Q2HYU1	ALEGLKGDLAGRY	195	207	8047	21.5166	3	454.917	1361.73	-0.414216	86.15		True
Q2HYU1	LEGLKGDLAGRY	196	207	8610	19.8386	3	431.238	1290.69	-1.54922	56.7		True
Q2HYU1	LFDKPVSPLL	227	236	56	30.3497	2	564.837	1127.66	-0.396747	22.16		False
ATP-dependent 6-phosphofructokinase, muscle type OS=Sus scrofa GN=PFKM PE=2 SV=1
Accession	peptide sequence	Start_pos	end_pos	progenesis peptide number	Retention time (min)	Charge	m/z	Measured mass	Mass error (ppm)	Score	Modifications	Use in quantitation
Q2HYU2	VHEGYQGLVDGGDNIRE	51	67	6985	19.7618	3	619.961	1856.86	-1.54951	25.65		True
Q2HYU2	LNDLQKAGKITAE	136	148	9197	15.5221	3	467.595	1399.76	-2.07964	53.94		False
Q2HYU2	ANITKFNIQG	483	492	5292	12.5806	3	369.535	1105.58	6.51513	13.01	[9] Deamidated (NQ)	False
Q2HYU2	IFEEPFTIRD	595	604	1424	28.9797	2	633.822	1265.63	-0.337473	21.59		False
Q2HYU2	FEEPFTIRD	596	604	2624	26.3115	2	577.28	1152.54	-0.381661	40.72		False
Q2HYU2	YSEEGKGIF	644	652	1706	19.9304	2	515.248	1028.48	-0.971891	23.79		True
Myozenin-1 OS=Sus scrofa GN=MYOZ1 PE=2 SV=1
Accession	peptide sequence	Start_pos	end_pos	progenesis peptide number	Retention time (min)	Charge	m/z	Measured mass	Mass error (ppm)	Score	Modifications	Use in quantitation
Q4PS85	LTGGGQESSGLNLGKKISVPRDVM	22	45	3025	23.5107	4	611.831	2443.29	7.87356	38	[6] Deamidated (NQ)	True
Q4PS85	IYENHPDVF	71	79	819	21.487	2	567.267	1132.52	-0.325308	17.01		True
Q4PS85	IYENHPDVFSDSSMDHF	71	87	6152	26.6058	3	680.619	2038.84	-0.0745434	132.01		True
Q4PS85	QKFLPTVGGQLGTAGQGF	88	105	7833	29.5141	2	903.481	1804.95	-0.184277	23.13		True
Q4PS85	KTYISPWEKAMGVDPHQKVEL	181	201	2262	25.1652	4	614.821	2455.26	-0.462546	23.9		True
Q4PS85	LAYGAKAELPQYKSF	206	220	3454	23.3047	3	562.635	1684.88	-0.125135	24.13		True
Carbonic anhydrase 3 OS=Sus scrofa GN=CA3 PE=2 SV=3
Accession	peptide sequence	Start_pos	end_pos	progenesis peptide number	Retention time (min)	Charge	m/z	Measured mass	Mass error (ppm)	Score	Modifications	Use in quantitation
Q5S1S4	WGYADHNGPDHW	5	16	3317	21.6358	3	485.534	1453.58	-0.740898	59.8		True
Q5S1S4	HTKDIKHDPSLL	34	45	11240	12.3675	2	702.385	1402.76	-0.869797	43.51		True
Q5S1S4	LPWTASYDPGSAKTIL	45	60	8921	32.0724	2	860.451	1718.89	-0.804578	36.61		True
Q5S1S4	PWTASYDPGSAKTIL	46	60	1724	28.3985	2	803.909	1605.8	-0.59743	24.88		True
Q5S1S4	PWTASYDPGSAKTILNNGKT	46	65	4945	23.972	3	707.691	2120.05	-1.08606	120.01		True
Q5S1S4	DDTYDRSML	71	79	1618	21.9967	2	558.237	1114.46	-0.80334	23.23		True
Q5S1S4	HLVHWNSKYNSF	119	130	1477	19.1389	3	511.252	1530.74	-0.919964	22.62		True
Q5S1S4	LLKEPITVSSDQ	210	221	1460	20.2647	2	665.364	1328.71	-3.26732	30.39		True
Q5S1S4	LLKEPITVSSDQMAKL	210	225	2584	25.2697	3	591.665	1771.97	-1.00365	50.74		True
Q5S1S4	LKEPITVSSDQ	211	221	714	17.3852	2	608.825	1215.63	5.24142e-05	16.07		True
Q5S1S4	LKEPITVSSDQMAKL	211	225	4055	23.3047	2	830.452	1658.89	-0.574067	85.85		True
Q5S1S4	RSLYSSAENEPPVPLVRN	226	243	7438	22.247	2	1014.53	2027.04	-0.521069	63.85		True
Q5S1S4	ENEPPVPLVRN	233	243	6137	20.4564	2	632.338	1262.66	0.0257731	16.35		True
Q5S1S4	RIVKASFK	253	260	10419	10.5817	3	316.871	947.59	-1.80189	19.57		True
Heat shock protein beta-1 OS=Sus scrofa GN=HSPB1 PE=2 SV=1
Accession	peptide sequence	Start_pos	end_pos	progenesis peptide number	Retention time (min)	Charge	m/z	Measured mass	Mass error (ppm)	Score	Modifications	Use in quantitation
Q5S1U1	FDQAFGLPR	30	38	10167	24.9149	2	525.772	1049.53	-0.207418	35.62		True
Q5S1U1	FDQAFGLPRL	30	39	8825	32.1034	2	582.314	1162.61	-0.460305	35.11		True
Q5S1U1	FDQAFGLPRLP	30	40	9044	32.9505	2	630.84	1259.67	-0.490762	42.9		True
Q5S1U1	FDQAFGLPRLPE	30	41	3111	32.1335	2	695.362	1388.71	0.428402	53.29		True
Q5S1U1	FDQAFGLPRLPEE	30	42	1396	32.1335	2	759.882	1517.75	-0.794264	64.88		True
Q5S1U1	WSQWLSHSGWPGY	43	55	10394	32.4725	2	795.859	1589.7	-1.08891	19.67		True
Q5S1U1	VAAPAYSRL	70	78	500	18.446	2	474.268	946.522	-1.54001	30.55		True
Q5S1U1	IQQTADRW	90	97	6132	15.4082	2	509.259	1016.5	-0.0586192	22.81		True
Q5S1U1	IQQTADRWRVSL	90	101	1309	22.3768	3	491.603	1471.79	-0.741904	27.09		True
Q5S1U1	SVEAPLPKPATQ	166	177	10512	17.6584	2	619.342	1236.67	-1.16381	36.59		True
Q5S1U1	SVEAPLPKPATQSAE	166	180	841	18.1485	2	762.899	1523.78	-0.199171	34.96		True
Q5S1U1	APLPKPATQSAE	169	180	8693	13.5677	2	605.326	1208.64	-2.44572	43.13		True
Myosin regulatory light chain 2, skeletal muscle isoform OS=Sus scrofa GN=HUMMLC2B PE=1 SV=1
Accession	peptide sequence	Start_pos	end_pos	progenesis peptide number	Retention time (min)	Charge	m/z	Measured mass	Mass error (ppm)	Score	Modifications	Use in quantitation
Q5XLD2	DQTQIQEFKEAF	23	34	8592	29.009	2	742.356	1482.7	-1.4047	15.7		True
Q5XLD2	TVIDQNRDGII	35	45	5886	22.2897	2	622.335	1242.65	-1.47603	17.01		True
Q5XLD2	TVIDQNRDGIID	35	46	259	20.8173	2	679.849	1357.68	-0.545189	18.44		True
Q5XLD2	TVIDQNRDGIIDKE	35	48	3284	17.3008	2	808.417	1614.82	-1.72757	35.14		True
Q5XLD2	TVIDQNRDGIIDKED	35	49	2406	17.5612	3	577.622	1729.85	-1.80446	23.24		True
Q5XLD2	TVIDQNRDGIIDKEDL	35	50	548	22.4418	2	922.472	1842.93	-1.27498	36.38		True
Q5XLD2	TVIDQNRDGIIDKEDLRDTF	35	54	6098	24.891	2	1182.09	2362.18	-0.506563	62.07		True
Q5XLD2	AAMGRLNVKNEEL	55	67	4494	18.1667	2	722.882	1443.75	-1.21179	19.43		True
Q5XLD2	LTMFGEKLKGAD	84	95	2543	21.6358	3	437.232	1308.67	-1.49675	97.11		False
Q5XLD2	LTMFGEKLKGADPED	84	98	1686	23.1219	2	825.905	1649.79	-1.29419	77.23		False
Q5XLD2	TMFGEKLKGADPED	85	98	3102	18.8572	2	769.363	1536.71	-0.741953	50.86		True
Q5XLD2	FGEKLKGADPED	87	98	2382	14.6011	2	653.319	1304.62	-1.60825	25.7		True
Q5XLD2	FKVLDPEGKGTIKKHF	104	119	8954	15.8005	4	461.766	1843.03	-1.21175	50.46		True
Q5XLD2	FKVLDPEGKGTIKKHFLEE	104	122	2995	19.489	4	554.558	2214.2	-1.19603	40.11		True
Q5XLD2	KVLDPEGKGTIKKHF	105	119	10999	11.9552	4	424.999	1695.97	-0.651508	53.12		True
Q5XLD2	KVLDPEGKGTIKKHFLEE	105	122	5571	15.3217	3	690.052	2067.13	-1.6792	98.12		True
Q5XLD2	LTTQCDRF	124	131	928	17.264	2	492.234	982.453	-1.28874	50.89		True
Q5XLD2	LTTQCDRFSQE	124	134	619	16.8833	2	664.3	1326.59	-1.60196	15.94		True
Q5XLD2	SQEEIKNMW	132	140	3008	22.7105	2	582.771	1163.53	-1.09014	21.25		True
Q5XLD2	AAFPPDVGGNVDYKNIC	141	157	5044	28.628	2	890.422	1778.83	-0.109515	29.56		True
Q5XLD2	AAFPPDVGGNVDYKNICY	141	158	5843	32.6093	2	971.953	1941.89	-1.16338	23.92		True
Q5XLD2	YVITHGDAKDQE	158	169	8325	11.5255	2	688.328	1374.64	-0.62689	53.54		True
Creatine kinase M-type OS=Sus scrofa GN=CKM PE=2 SV=1
Accession	peptide sequence	Start_pos	end_pos	progenesis peptide number	Retention time (min)	Charge	m/z	Measured mass	Mass error (ppm)	Score	Modifications	Use in quantitation
Q5XLD3	PFGNTHNKYKLN	2	13	8631	12.2419	2	716.87	1431.72	-0.756527	31.05		False
Q5XLD3	PFGNTHNKYKLNF	2	14	99	18.3637	3	527.271	1578.79	-1.05008	41.26		False
Q5XLD3	KAEEEYPDLSKHNNHMAKA	15	33	5851	11.7223	3	738.019	2211.04	-1.0978	150.1		False
Q5XLD3	KAEEEYPDLSKHNNHMAKA	15	33	10647	11.6542	3	743.351	2227.03	-1.12996	108.53	[16] Oxidation (M)	False
Q5XLD3	KAEEEYPDLSKHNNHMAKALT	15	35	5033	14.4829	3	809.396	2425.17	-1.38099	51.08		False
Q5XLD3	KAEEEYPDLSKHNNHMAKALTL	15	36	3404	18.62	3	847.09	2538.25	-1.6581	57.45		False
Q5XLD3	KAEEEYPDLSKHNNHMAKALTLE	15	37	3981	18.4075	3	890.104	2667.29	-1.88923	88.41		False
Q5XLD3	EIYKKLRDKETPSGF	37	51	8704	15.7382	2	905.987	1809.96	-1.71985	70.42		False
Q5XLD3	IYKKLRDKETPSGF	38	51	10374	12.8742	2	841.466	1680.92	-1.51128	61.29		False
Q5XLD3	IYKKLRDKETPSGFTLD	38	54	10276	16.9515	2	1006.05	2010.08	-1.06826	20.67		False
Q5XLD3	TLDDVIQTGVDNPGHPFIMT	52	71	6307	34.0629	2	1085.53	2169.04	-0.629048	61.58		True
Q5XLD3	DDVIQTGVDNPGHPF	54	68	7498	26.2542	2	805.875	1609.74	-0.840046	46.81		True
Q5XLD3	DDVIQTGVDNPGHPFIM	54	70	3507	32.0419	2	927.937	1853.86	-0.734109	71.81		True
Q5XLD3	DDVIQTGVDNPGHPFIMT	54	71	1916	31.0063	2	978.462	1954.91	-0.399367	65.82		True
Q5XLD3	DDVIQTGVDNPGHPFIMTVG	54	73	9255	33.0786	2	1056.51	2111	-0.75446	54.66		True
Q5XLD3	DVIQTGVDNPGHPFI	55	69	5156	29.4525	2	804.903	1607.79	-2.16947	99.87		True
Q5XLD3	DVIQTGVDNPGHPFIM	55	70	1198	31.3912	2	870.424	1738.83	-0.454819	50.96		False
Q5XLD3	DVIQTGVDNPGHPFIMT	55	71	414	30.3497	2	920.948	1839.88	-1.08812	50.91		True
Q5XLD3	DVIQTGVDNPGHPFIMTVG	55	73	4100	32.4725	2	998.992	1995.97	-1.74968	39.56		True
Q5XLD3	VIQTGVDNPGHPF	56	68	1856	21.3545	2	690.849	1379.68	-0.668123	58.08		True
Q5XLD3	VIQTGVDNPGHPFIM	56	70	773	27.6703	2	812.911	1623.81	-0.862713	32.65		True
Q5XLD3	VIQTGVDNPGHPFIMT	56	71	272	26.8245	2	863.434	1724.85	-0.868956	41.6		True
Q5XLD3	VIQTGVDNPGHPFIMT	56	71	8503	24.1173	2	871.432	1740.85	-0.627116	58.53	[15] Oxidation (M)	True
Q5XLD3	VIQTGVDNPGHPFIMTVG	56	73	2896	29.1696	2	941.479	1880.94	-0.72898	31.71		True
Q5XLD3	IQTGVDNPGHPFIM	57	70	8690	26.6893	2	763.376	1524.74	-1.15369	44.88		True
Q5XLD3	IQTGVDNPGHPFIMT	57	71	5264	25.8489	2	813.9	1625.78	-1.66372	40.62		True
Q5XLD3	KDLFDPIIQDRHGGYKPTDKHKTDLNHE	86	113	8090	16.3955	5	664.338	3316.65	-1.60469	95.88		True
Q5XLD3	PIIQDRHGGYKPTDKHKTDLNHE	91	113	11020	11.0906	5	540.678	2698.35	-1.00057	36.9		True
Q5XLD3	ALNSLTGEFKGKYYPLKSMT	161	180	5818	25.5156	4	562.797	2247.16	-0.445389	59.54		False
Q5XLD3	NSLTGEFKGKYYPLKS	163	178	6852	20.552	2	916.482	1830.95	-0.775092	72.67		False
Q5XLD3	NSLTGEFKGKYYPLKSMT	163	180	1231	22.8381	3	688.686	2063.04	-1.42589	75.36		False
Q5XLD3	NSLTGEFKGKYYPLKSMTE	163	181	6678	23.2117	2	1097.05	2192.08	-0.484163	72.79		False
Q5XLD3	NSLTGEFKGKYYPLKSMTEQ	163	182	5290	23.1008	3	774.387	2320.14	-0.817338	54.84		False
Q5XLD3	NSLTGEFKGKYYPLKSMTEQE	163	183	2510	23.3246	3	817.401	2449.18	-1.18911	35.81		False
Q5XLD3	NSLTGEFKGKYYPLKSMTEQEQQQLIDDHF	163	192	9679	28.5995	5	715.749	3573.71	0.603801	22.36		False
Q5XLD3	EQEQQQLIDDHFL	181	193	6952	29.3353	2	821.889	1641.76	0.0769432	62.8		False
Q5XLD3	QEQQQLIDDHF	182	192	4634	23.5614	2	700.826	1399.64	-0.198625	29.17		False
Q5XLD3	QQQLIDDHF	184	192	4046	23.074	2	572.274	1142.53	-1.31666	19.62		False
Q5XLD3	QQQLIDDHFL	184	193	5388	28.3521	2	628.817	1255.62	-0.831441	21.01		False
Q5XLD3	LFDKPVSPLL	193	202	56	30.3497	2	564.837	1127.66	-0.396747	22.16		False
Q5XLD3	FDKPVSPL	194	201	264	20.552	2	451.753	901.491	-0.399021	22.24		False
Q5XLD3	LASGMARDWPDA	203	214	4103	22.6636	2	645.3	1288.59	-1.15904	19.91		False
Q5XLD3	ASGMARDWPDARGIWHNDNKSF	204	225	1373	23.9316	4	633.546	2530.15	-0.749153	25.11		False
Q5XLD3	ASGMARDWPDARGIWHNDNKSFL	204	226	4097	27.0843	4	661.816	2643.24	-1.77031	26.65		False
Q5XLD3	ARDWPDARGIWHNDNKSF	208	225	1312	22.1972	5	437.812	2184.02	-0.619275	15.54		False
Q5XLD3	ARDWPDARGIWHNDNKSFL	208	226	7143	25.6867	5	460.429	2297.11	-0.508965	16.67		False
Q5XLD3	LVWVNEEDHL	226	235	299	27.6389	2	627.311	1252.61	-1.04617	55.58		False
Q5XLD3	LVWVNEEDHLRV	226	237	4027	25.8008	3	503.599	1507.78	-1.29886	88.82		False
Q5XLD3	VWVNEEDHL	227	235	54	22.4418	2	570.769	1139.52	-0.726678	46.64		False
Q5XLD3	VWVNEEDHLR	227	236	2973	17.264	3	432.882	1295.62	-1.20296	31.41		False
Q5XLD3	VWVNEEDHLRV	227	237	516	21.6812	3	465.905	1394.69	-0.479322	70.03		False
Q5XLD3	IFKKAGHPF	263	271	8966	12.3031	2	522.803	1043.59	-0.556091	18.1		False
Q5XLD3	IFKKAGHPFM	263	272	2632	14.334	3	392.55	1174.63	-2.07267	16.93		False
Q5XLD3	FMWNEHLGY	271	279	6017	29.7021	2	598.763	1195.51	-0.373021	13.15		False
Q5XLD3	VLTCPSNLGTGLRGGVH	280	296	2442	22.4647	3	560.968	1679.88	2.87474	62.24		False
Q5XLD3	PSNLGTGLRGGVH	284	296	6870	13.8569	3	422.229	1263.67	-1.91058	79.33		False
Q5XLD3	PSNLGTGLRGGVHVKL	284	299	2649	19.4629	4	401.985	1603.91	-3.70835	26.04		False
Q5XLD3	GTGLRGGVHVKL	288	299	2452	14.9467	3	398.574	1192.7	-2.38077	24.71		False
Q5XLD3	VKLAHLSKHPKF	297	308	8387	12.1128	4	351.967	1403.84	-1.87722	47.06		False
Q5XLD3	AHLSKHPKF	300	308	10176	10.0279	2	532.803	1063.59	-1.21814	20.48		False
Q5XLD3	SVFDVSNADRLGSSEVEQ	332	349	8683	26.6893	2	969.955	1937.9	-0.278133	66.52		False
Q5XLD3	FDVSNADRLGSSEVEQ	334	349	4968	23.1902	2	876.905	1751.79	-0.909184	26.46		False
Q5XLD3	DVSNADRLGSSE	335	346	2189	14.4829	2	625.285	1248.56	-1.72573	57.71		False
Q5XLD3	DVSNADRLGSSEVE	335	348	1790	18.0214	2	739.341	1476.67	-1.83577	33.03		False
Q5XLD3	VQLVVDGVKL	350	359	554	30.3497	2	535.334	1068.65	-0.59297	35.55		False
Q5XLD3	LVVDGVKL	352	359	716	27.3514	2	421.77	841.526	-1.21382	30.06		False
Q5XLD3	VVDGVKL	353	359	6	18.3637	2	365.228	728.442	-1.39024	25.7		False
Q5XLD3	MVEMEKKLEKGQSID	360	374	8319	15.9974	3	588.966	1763.88	-1.27395	36.56		False
Q5XLD3	MVEMEKKLEKGQSIDDMIPAQK	360	381	3122	21.3545	3	850.098	2547.27	-0.637656	120.98		False
Q5XLD3	VEMEKKLEKGQSIDDMIPAQK	361	381	1912	19.3961	4	605.065	2416.23	-1.00126	30.82		False
Q5XLD3	MEKKLEKGQSIDDMIPAQK	363	381	5283	16.6445	2	1095.07	2188.12	-1.37919	108.63		False
Q5XLD3	EKKLEKGQSIDDMIPAQK	364	381	858	15.9265	4	515.277	2057.08	-1.66689	---		False
Q5XLD3	EKKLEKGQSIDDMIPAQK	364	381	2766	15.9265	3	686.701	2057.08	-1.40272	121.04		False
Troponin T, fast skeletal muscle OS=Sus scrofa GN=TNNT3 PE=2 SV=1
Accession	peptide sequence	Start_pos	end_pos	progenesis peptide number	Retention time (min)	Charge	m/z	Measured mass	Mass error (ppm)	Score	Modifications	Use in quantitation
Q75NG9	YEEEEEAQEEAPPPPAEVHEVHE	13	35	3239	19.1181	3	892.052	2673.13	-0.912092	53.34		True
Q75NG9	EAQEEAPPPPAEVHEVHE	18	35	1195	16.2483	3	665.64	1993.9	-1.75143	50.67		True
Q75NG9	AQEEAPPPPAEVHEVHE	19	35	7022	15.8558	3	622.627	1864.86	-0.635784	38.34		True
Q75NG9	APPPPAEVHEVHE	23	35	6964	13.4051	3	470.233	1407.68	-0.703635	72.9		True
Q75NG9	EEKPRPKLTAPKIPEGEKVDF	49	69	1797	19.5749	5	482.469	2407.31	-0.775141	24.51		True
Q75NG9	APKIPEGEKVDF	58	69	5770	19.9736	3	443.906	1328.7	-0.783567	17.07		True
Q75NG9	PKIPEGEKVDF	59	69	964	19.1863	2	629.837	1257.66	-0.767696	26.86		True
Q75NG9	DDIQKKRQNKDLMEL	70	84	9093	15.7382	2	937.493	1872.97	-0.431669	22.96		True
Q75NG9	LQALIDSHF	84	92	4814	26.8928	2	522.279	1042.54	-0.58295	38.42		True
Q75NG9	QALIDSHF	85	92	168	22.9301	2	465.737	929.46	-0.768441	27.81		True
Q75NG9	QALIDSHFEARKKEEEEL	85	102	11179	18.002	3	724.701	2171.08	-1.93683	53.52		True
Q75NG9	LIDSHFEARKKEEEEL	87	102	10564	16.0743	3	658.337	1971.99	-0.33048	20.93		True
Q75NG9	YQLEIDKF	221	228	1041	27.7693	2	528.273	1054.53	-0.999126	33.09		True
Q75NG9	YQLEIDKFEYGEK	221	233	6495	25.3999	3	554.607	1660.8	-0.223365	90.61		True
Q75NG9	IDKFEYGEK	225	233	9137	13.9921	3	376.857	1127.55	-0.685599	27.13		True
Alpha-crystallin B chain OS=Sus scrofa GN=CRYAB PE=2 SV=1
Accession	peptide sequence	Start_pos	end_pos	progenesis peptide number	Retention time (min)	Charge	m/z	Measured mass	Mass error (ppm)	Score	Modifications	Use in quantitation
Q7M2W6	PASTSLSPFY	39	48	10878	29.8818	2	535.263	1068.51	-0.461293	17.7		True
Q7M2W6	MRLEKDRF	68	75	6130	12.7783	3	365.53	1093.57	-1.55873	17.7		True
Q7M2W6	LDVKHFSPEE	79	88	4615	18.4264	2	600.797	1199.58	-1.48822	22.7		False
Voltage-dependent anion-selective channel protein 1 OS=Sus scrofa GN=VDAC1 PE=2 SV=3
Accession	peptide sequence	Start_pos	end_pos	progenesis peptide number	Retention time (min)	Charge	m/z	Measured mass	Mass error (ppm)	Score	Modifications	Use in quantitation
Q9MZ16	ADLGKSARDVF	8	18	7842	18.5342	3	393.543	1177.61	-2.25962	22.29		True
Q9MZ16	GYQMNFETAKSRVTQSNFAVGYKTDEFQLHTNVNDGTEFGGS	152	193	9721	22.7912	4	1170.03	4676.1	0.0707732	17.58	[15] Deamidated (NQ)|[17] Deamidated (NQ)	True
Myosin-4 OS=Sus scrofa GN=MYH4 PE=2 SV=1
Accession	peptide sequence	Start_pos	end_pos	progenesis peptide number	Retention time (min)	Charge	m/z	Measured mass	Mass error (ppm)	Score	Modifications	Use in quantitation
Q9TV62	IKTKIQL	11	17	877	15.1707	2	422.286	842.557	-2.24515	22.58		False
Q9TV62	VAEPKESF	40	47	126	15.1707	2	453.731	905.448	-1.68447	22.85		False
Q9TV62	VKGTVQSREGGKVTVKTEAGATL	48	70	5855	13.3358	3	772.766	2315.28	-1.41456	39.04		False
Q9TV62	LTVKEDQVFPMNPPKF	70	85	4625	28.7218	3	630.666	1888.98	0.194446	29.32		False
Q9TV62	TVKEDQVFPMNPPK	71	84	3235	20.1705	2	815.418	1628.82	-0.483429	94.09		False
Q9TV62	TVKEDQVFPMNPPKF	71	85	886	26.8742	2	888.952	1775.89	-1.06824	89.51		False
Q9TV62	TVKEDQVFPMNPPKF	71	85	7560	23.0468	3	598.302	1791.89	-0.823414	25.78	[10] Oxidation (M)	False
Q9TV62	TVKEDQVFPMNPPKFDKIED	71	90	1793	25.6409	3	793.062	2376.16	-1.05399	50.13		False
Q9TV62	TVKEDQVFPMNPPKFDKIEDM	71	91	9867	28.424	4	627.809	2507.21	0.0762489	23.52		False
Q9TV62	VKEDQVFPMNPPKF	72	85	4463	26.8037	3	559.288	1674.84	-0.2637	17.1		False
Q9TV62	DQVFPMNPPK	75	84	5319	23.1902	2	586.792	1171.57	-0.73598	31.08		False
Q9TV62	PMNPPKF	79	85	1773	19.0562	2	415.715	829.415	-0.962956	27.26		False
Q9TV62	YNLKERY	104	110	5109	13.1308	3	329.174	984.501	-2.07984	23.47		False
Q9TV62	YNLKERYA	104	111	10637	13.3715	3	352.853	1055.54	-1.44366	16.47		False
Q9TV62	YNLKERYAAW	104	113	578	20.7017	2	657.335	1312.66	-0.151916	19.71		False
Q9TV62	YNLKERYAAWM	104	114	4436	24.1173	2	722.855	1443.7	-0.694542	16.55		False
Q9TV62	FMLTDRE	165	171	1389	19.7905	2	456.218	910.421	-1.21558	17.01		False
Q9TV62	ITGESGAGKTVNT	177	189	7506	11.1698	2	617.817	1233.62	-0.926549	21.94		False
Q9TV62	ITGESGAGKTVNTKRVIQ	177	194	11389	12.2099	2	930.02	1858.03	-0.621448	111.36		False
Q9TV62	ITGESGAGKTVNTKRVIQY	177	195	3502	14.9132	2	1011.55	2021.09	-1.82084	145.83		False
Q9TV62	ITGESGAGKTVNTKRVIQYF	177	196	9407	20.4082	3	723.727	2168.16	-0.303008	92.3		False
Q9TV62	IAVTGEKKKEEPTPGKMQGTLED	199	221	9206	14.0938	3	829.431	2485.27	-1.2707	53.76		True
Q9TV62	EAFGNAKTVRNDNSSRF	231	247	9557	14.1268	3	638.313	1911.92	-0.893279	53.54		False
Q9TV62	EAFGNAKTVRNDNSSRFGKF	231	250	11435	16.4589	2	1123.06	2244.1	0.357914	29.2		False
Q9TV62	AFGNAKTVRNDNSSRFGKF	232	250	4422	15.3552	5	424.019	2115.06	-2.24166	27.2		False
Q9TV62	FGNAKTVRNDNSSRFGKF	233	250	1170	14.4829	4	512.012	2044.02	-1.4721	44.45		False
Q9TV62	IRIHFGTTGKL	251	261	2210	18.4264	3	414.915	1241.72	-1.94288	20.17		False
Q9TV62	IRIHFGTTGKLASAD	251	265	2121	19.2339	2	793.935	1585.86	-1.38383	17.08		False
Q9TV62	LEKSRVTFQ	271	279	7319	12.7108	2	554.311	1106.61	-1.51376	15.76		False
Q9TV62	YQIMSNKKPE	290	299	10579	12.5228	2	619.315	1236.62	-1.44228	15.33		False
Q9TV62	YQIMSNKKPEL	290	300	76	17.9031	3	450.907	1349.7	-1.59511	52.24		False
Q9TV62	YQIMSNKKPELIE	290	302	3997	20.5001	2	796.921	1591.83	-0.703911	28.14		False
Q9TV62	QIMSNKKPEL	291	300	2523	13.9676	3	396.553	1186.64	-1.11318	41.55		False
Q9TV62	FVSQGEITVPSIDD	315	328	2779	30.9483	2	753.869	1505.72	-0.509235	21.33		False
Q9TV62	FVSQGEITVPSIDDQ	315	329	4964	30.3773	2	817.898	1633.78	-1.37893	19.43		False
Q9TV62	VSQGEITVPSIDD	316	328	1233	27.944	2	680.335	1358.66	-0.267235	18.65		False
Q9TV62	VSQGEITVPSIDDQ	316	329	2465	27.4598	2	744.364	1486.71	-1.25959	29.07		False
Q9TV62	VSQGEITVPSIDDQE	316	330	4505	27.7693	2	808.885	1615.76	-0.796281	13.48		False
Q9TV62	ILGFTSDE	341	348	2048	28.9471	1	881.424	880.416	-1.60381	16.93		False
Q9TV62	AVMHYGNLK	358	366	10104	13.3022	3	344.847	1031.52	-1.76811	17.84		False
Q9TV62	AVMHYGNLKF	358	367	479	22.418	3	393.87	1178.59	-1.09318	27.78		False
Q9TV62	AVMHYGNLKFKQKQREEQAEPDGTE	358	382	9362	13.9676	3	978.477	2932.41	-1.13731	31.64		False
Q9TV62	LKALCYPRVKVGNE	399	412	3804	18.5542	3	530.632	1588.87	-0.601594	25.08		False
Q9TV62	LCYPRVKVGNE	402	412	131	18.2528	3	426.56	1276.66	-1.96214	14.45		False
Q9TV62	VTKGQTVQQVYNAVGALAKA	414	433	4341	28.7218	3	682.716	2045.13	0.119817	102.14		False
Q9TV62	VTKGQTVQQVYNAVGALAKAVYDKM	414	438	11390	39.0621	4	671.363	2681.42	0.10984	74.74		False
Q9TV62	VGALAKAVYDKM	427	438	7729	21.3973	3	422.569	1264.68	-0.869052	91.02		False
Q9TV62	ALAKAVYDKM	429	438	2690	16.2483	3	370.538	1108.59	-2.06274	66.57		False
Q9TV62	LAKAVYDKM	430	438	7955	13.8918	3	346.859	1037.55	-2.87647	36.71		False
Q9TV62	AKAVYDKMF	431	439	9427	18.3453	2	536.778	1071.54	-1.13417	26.94		False
Q9TV62	AKAVYDKMFL	431	440	7883	22.6831	2	593.32	1184.62	-1.17014	25.04		False
Q9TV62	WMVTRINQQL	441	450	3800	26.3614	2	644.845	1287.68	-0.565596	20.48		False
Q9TV62	VTRINQQLDTKQPRQ	443	457	6802	11.8193	4	457.006	1823.99	-1.5787	40.21		False
Q9TV62	VTRINQQLDTKQPRQYFIG	443	461	10371	20.6376	3	769.085	2304.23	-0.674182	21.64		False
Q9TV62	RINQQLDTKQPRQ	445	457	11302	10.4827	2	812.946	1623.88	-1.81945	36.05		False
Q9TV62	RINQQLDTKQPRQYF	445	459	7001	17.3396	3	645.677	1934.01	-1.05349	22.16		False
Q9TV62	INFTNEKLQQ	481	490	1549	19.5749	2	617.825	1233.63	-0.640925	32.78		False
Q9TV62	TNEKLQQFFNHHM	484	496	4722	21.0378	3	558.6	1672.78	-0.654227	94.41		False
Q9TV62	KLQQFFNHHM	487	496	9228	16.8153	2	665.329	1328.64	-1.13499	19.14		False
Q9TV62	EQEEYKKEGIEWE	500	512	9384	18.7521	2	848.888	1695.76	-0.53365	18.67		False
Q9TV62	ETVSKAKGNLEKM	500	512	6145	11.5255	2	717.884	1433.75	-0.925686	61.7		False
Q9TV62	IEKPMGIF	527	534	15	25.7112	2	467.757	933.499	-0.540896	17.95		False
Q9TV62	EEECMFPKATDTSF	538	551	8478	28.1154	2	817.839	1633.66	-0.566951	54.98		False
Q9TV62	YEQHLGKSNNFQKPKPAKGKAEAHF	556	580	10674	11.6542	3	952.162	2853.46	-1.42702	87.11		True
Q9TV62	VDYNITGWLDKNKDPLNE	589	606	2593	31.2501	3	712.019	2133.04	-0.593523	144.25		False
Q9TV62	YNITGWLDKNKDPLN	591	605	8296	28.1693	3	597.64	1789.9	-0.635077	66.43		False
Q9TV62	YNITGWLDKNKDPLNE	591	606	4241	28.7993	2	960.478	1918.94	-0.407069	72.69		False
Q9TV62	NITGWLDKNKDPLN	592	605	2229	25.0312	3	543.286	1626.84	-0.507021	65.4		False
Q9TV62	NITGWLDKNKDPLNE	592	606	59	25.8707	3	586.3	1755.88	-0.630005	49.28		False
Q9TV62	NITGWLDKNKDPLNE	592	606	11128	29.3625	3	586.629	1756.86	0.518937	20.58	[1] Deamidated (NQ)	False
Q9TV62	WLDKNKDPLNE	596	606	10223	18.9199	2	686.348	1370.68	-1.12273	27.93		False
Q9TV62	YQKSSVKTL	612	620	10659	10.954	2	527.3	1052.59	-0.918347	23.03		False
Q9TV62	YQKSSVKTLAFL	612	623	3131	23.2808	2	692.895	1383.78	-0.165202	28.84		False
Q9TV62	MTNLRSTHPHF	661	671	6725	13.8918	4	335.918	1339.64	-1.66874	25.68		False
Q9TV62	VRCIIPNETKTPGAME	672	687	6951	20.1496	3	586.967	1757.88	-0.843435	14.57		False
Q9TV62	VRCIIPNETKTPGAMEHE	672	689	761	17.9225	3	675.667	2023.98	-1.71372	20.8		False
Q9TV62	IIPNETKTPGAM	675	686	3636	17.6584	2	636.334	1270.65	-4.11871	54.43		False
Q9TV62	IIPNETKTPGAME	675	687	3198	17.6315	2	700.857	1399.7	-1.33524	65.22		False
Q9TV62	IIPNETKTPGAMEHE	675	689	3968	15.3552	2	833.907	1665.8	-1.66683	83.31		False
Q9TV62	IIPNETKTPGAMEHE	675	689	6248	15.3552	3	561.605	1681.79	-2.26192	63.21	[12] Oxidation (M)	False
Q9TV62	FIDSKKASEKLLGSID	737	752	7739	23.022	3	584.324	1749.95	-0.42193	28.17		False
Q9TV62	IDSKKASEKLLGS	738	750	6628	13.8569	2	688.392	1374.77	-1.51085	30.86		False
Q9TV62	IDSKKASEKLLGSID	738	752	850	19.6714	2	802.448	1602.88	-1.27728	43.79		False
Q9TV62	IQYNIRAF	816	823	8083	24.9149	2	512.782	1023.55	-1.22873	18.13		False
Q9TV62	IQYNIRAFM	816	824	4380	29.6715	2	578.302	1154.59	-0.215282	23.72		False
Q9TV62	FMNVKHWPW	823	831	6920	27.2479	3	415.539	1243.59	-1.20696	15.5		False
Q9TV62	FMNVKHWPWMK	823	833	5904	24.8684	3	501.918	1502.73	0.1217	66.98		False
Q9TV62	FMNVKHWPWMKL	823	834	8186	28.5112	3	539.613	1615.82	0.0970535	43.43		False
Q9TV62	MNVKHWPWMK	824	833	5421	21.0173	3	452.894	1355.66	-1.11074	39.56		False
Q9TV62	MNVKHWPWMKL	824	834	9951	25.4586	3	490.589	1468.75	-1.01597	37.16		False
Q9TV62	NVKHWPWMK	825	833	2146	18.0419	3	409.214	1224.62	-1.04511	30.81		False
Q9TV62	NVKHWPWMKL	825	834	2186	23.1219	3	446.909	1337.71	-0.980123	40.43		False
Q9TV62	YFKIKPL	835	841	120	20.1496	3	303.525	907.552	-1.17941	31.22		False
Q9TV62	YFKIKPL	835	841	522	20.1084	2	454.783	907.552	-0.900797	22.29		False
Q9TV62	YFKIKPLL	835	842	419	25.0091	2	511.325	1020.64	-1.01572	28.4		False
Q9TV62	YFKIKPLLKSAETEKE	835	850	7106	18.4075	4	481.774	1923.07	-1.70333	111.38		False
Q9TV62	KSAETEKEMANM	843	854	8745	11.9552	2	684.81	1367.61	-0.461015	38.35		False
Q9TV62	KEEFEKTKEDLAKSEAKRKELEEKM	855	879	3801	16.1367	4	764.151	3052.58	0.0530986	64.53		False
Q9TV62	QVQAEADGLADAEERCDQL	892	910	8519	27.4056	2	1030.96	2059.91	-1.24715	138.81		True
Q9TV62	EAKIKEVTERAEDE	918	931	8017	13.3358	3	549.612	1645.81	-1.6303	65.35		False
Q9TV62	EAKIKEVTERAEDEEEIN	918	935	7297	17.5612	2	1066.52	2131.03	-0.453299	34.64		False
Q9TV62	AKVEKEKHATENKVKNLTEE	964	983	6969	10.4827	3	775.751	2324.23	-1.38106	86.22		False
Q9TV62	MAGLDENIAKL	984	994	9054	27.0843	2	587.81	1173.61	-0.673954	42.17		True
Q9TV62	AGLDENIAKL	985	994	7742	24.3467	2	522.29	1042.57	-0.363219	39.02		True
Q9TV62	QAEEDKVNTLTKAKTKL	1013	1029	4131	14.4829	4	480.021	1916.05	-1.51766	81.34		False
Q9TV62	DKVNTLTKAKTKL	1017	1029	10475	11.8863	4	365.726	1458.87	-1.69893	41.91		False
Q9TV62	EQQVDDLEGSLEQEKKLRM	1030	1048	6603	23.7279	4	569.536	2274.12	-0.194761	98.93		False
Q9TV62	EQQVDDLEGSLEQEKKLRMDL	1030	1050	4125	27.3767	4	626.564	2502.23	-0.0117396	110.76		False
Q9TV62	EGSLEQEKKLRMDL	1037	1050	5707	19.1181	3	559.294	1674.86	-0.811836	55.73		False
Q9TV62	DIENDKQQLDEKLKKKEFEMSNL	1070	1092	6641	23.5614	3	941.479	2821.41	-1.06717	91.63		False
Q9TV62	DEKLKKKEFEMSNL	1079	1092	5488	16.7894	2	869.954	1737.89	-2.23468	17.7		False
Q9TV62	AMQLQKKIKELQ	1103	1114	5174	15.9452	3	486.621	1456.84	-0.862813	32.48		False
Q9TV62	AMQLQKKIKELQA	1103	1115	11315	17.1368	2	764.947	1527.88	-0.908231	31.83		False
Q9TV62	AMQLQKKIKELQARTEE	1103	1119	2535	18.3867	4	511.783	2043.1	-5.67638	20.71		True
Q9TV62	LEEEIEAERASRAKAEKQRSDL	1120	1141	4343	14.5698	4	640.334	2557.31	-1.36205	35.73		False
Q9TV62	EEEIEAERASRAKAEKQRSDL	1121	1141	10091	12.4284	4	612.063	2444.22	-0.449394	63.91		False
Q9TV62	EIEAERASRAKAEKQRSDL	1123	1141	10590	11.2821	3	729.72	2186.14	-0.796372	16.27		False
Q9TV62	IEMNKKREAEF	1163	1173	7251	12.4022	2	697.858	1393.7	-0.883817	26.51		False
Q9TV62	IEMNKKREAEFQKMRRDLE	1163	1181	8098	16.0301	5	491.057	2450.25	-1.52747	23.37		False
Q9TV62	IEMNKKREAEFQKMRRDLEE	1163	1182	4953	16.7258	3	860.771	2579.29	-1.84326	16.68		False
Q9TV62	ATLQHEATAAALRKKHADSVAEL	1183	1205	8230	16.0478	3	811.106	2430.3	-0.842232	15.14		False
Q9TV62	GEQIDNLQRVKQKLEKEKSEL	1206	1226	2487	22.039	4	628.848	2511.36	-0.651855	77.99		False
Q9TV62	QRVKQKLEKEKSEL	1213	1226	10900	10.4827	2	872.008	1742	-1.77361	15.36		False
Q9TV62	ASNMETVSKAKGNL	1234	1247	8688	14.0938	2	725.371	1448.73	-0.867196	89.59		False
Q9TV62	ASNMETVSKAKGNLEKM	1234	1250	9004	16.1918	2	919.46	1836.91	-1.21187	111.29		False
Q9TV62	NMETVSKAKGNLEKM	1236	1250	6211	15.0442	3	560.619	1678.84	-1.33925	42.31		False
Q9TV62	SEVKTKEEEHQRLINE	1259	1274	8705	11.2821	3	657.004	1967.99	-0.785516	88.08		True
Q9TV62	SEVKTKEEEHQRLINEL	1259	1275	6431	15.4735	3	694.698	2081.07	-1.73726	68.35		True
Q9TV62	INELSAQKARL	1272	1282	4854	15.7792	3	414.91	1241.71	-1.43146	31.71		True
Q9TV62	LSAQKARL	1275	1282	7700	11.2821	2	443.777	885.539	-0.838072	18.83		True
Q9TV62	QTESGEFSRQLDEKEAL	1283	1299	6181	20.5235	3	656.316	1965.93	-0.33064	23.3		False
Q9TV62	VSQLSRGKQAFTQQ	1300	1313	3289	13.1308	2	789.422	1576.83	-1.33716	53.9		False
Q9TV62	REQYEEEQEAKAEL	1346	1359	5892	16.3367	3	584.606	1750.8	-1.86999	13.47		False
Q9TV62	QRAMSKANSEVAQWRTKYETD	1360	1380	7632	16.8153	3	833.739	2498.19	-1.13776	26.45		False
Q9TV62	QRAMSKANSEVAQWRTKYETDA	1360	1381	2591	17.6769	3	857.417	2569.23	-1.55899	24.8		False
Q9TV62	QRAMSKANSEVAQWRTKYETDAIQRTEE	1360	1387	6652	19.7386	5	666.128	3325.61	-1.48302	24.19		False
Q9TV62	VAQWRTKYETDA	1370	1381	3600	15.2836	2	734.363	1466.71	-2.66604	39.27		False
Q9TV62	LEEAKKKLAQRLQ	1388	1400	11054	11.2821	4	389.488	1553.92	-1.28958	59.18		False
Q9TV62	LEEAKKKLAQRLQD	1388	1401	9825	11.7844	2	835.482	1668.95	-1.37824	51.99		False
Q9TV62	LEEAKKKLAQRLQDAEE	1388	1404	4941	14.4829	2	1000.04	1998.07	-1.46996	68.34		False
Q9TV62	HVEAVNAKCASL	1405	1416	2416	15.1707	2	621.318	1240.62	-0.963227	44.46		False
Q9TV62	EKTKQRLQNEVEDL	1417	1430	2849	16.0478	2	865.456	1728.9	-1.76153	18.51		False
Q9TV62	AALDKKQRNFDKILAE	1442	1457	2068	16.596	3	620.682	1859.02	-1.42254	25.28		False
Q9TV62	EASQKESRSLSTEL	1470	1483	2103	14.87	2	782.893	1563.77	-2.056	38.97		False
Q9TV62	ETLKRENKNLQQEISDL	1498	1514	2368	21.1243	2	1029.54	2057.07	-1.13402	16.33		False
Q9TV62	AALEEAEASLEHEEGKIL	1544	1561	6463	30.6916	3	646.993	1937.96	-1.09107	65.49		False
Q9TV62	EEAEASLEHEEGKI	1547	1560	3556	17.6584	2	785.864	1569.71	-1.62981	57.76		False
Q9TV62	EEAEASLEHEEGKIL	1547	1561	1465	22.1064	2	842.406	1682.8	-0.946061	30.96		False
Q9TV62	EEAEASLEHEEGKILRIQ	1547	1564	6781	23.5324	3	694.353	2080.04	-3.53115	131.67		False
Q9TV62	EEAEASLEHEEGKILRIQL	1547	1565	2913	28.424	4	549.289	2193.13	-0.00518928	110.11		False
Q9TV62	EAEASLEHEEGKIL	1548	1561	8175	20.3675	2	777.885	1553.76	-0.884823	34.74		False
Q9TV62	ELNQVKSEIDRKIAEKDEE	1566	1584	2684	18.3018	3	758.391	2272.15	-1.56326	87.22		False
Q9TV62	ELNQVKSEIDRKIAEKDEEIDQ	1566	1587	9121	21.1243	3	877.114	2628.32	-1.29765	17.7		True
Q9TV62	DAEIRSRNDAL	1604	1614	9524	13.3715	2	630.32	1258.63	-0.673501	21.76		False
Q9TV62	DAEIRSRNDALRI	1604	1616	1490	16.8153	3	510.277	1527.81	-1.42745	29.23		False
Q9TV62	MEIQLNHA	1627	1634	5284	19.3016	2	478.237	954.459	-0.81191	16.93		False
Q9TV62	IQLNHANRQATE	1629	1640	10190	11.1484	2	697.86	1393.71	-0.527728	42.8		True
Q9TV62	IQLNHANRQATEA	1629	1641	9507	11.5881	2	733.378	1464.74	-1.41844	38.93		True
Q9TV62	KDTQLHL	1652	1658	4840	13.4051	2	427.739	853.464	-2.22745	18.74		False
Q9TV62	HLDDAIRGQDDL	1658	1669	958	19.0777	2	684.331	1366.65	-0.336724	24.93		True
Q9TV62	HLDDAIRGQDDLKEQL	1658	1673	5535	20.8903	3	622.649	1864.93	-0.955601	16.87		True
Q9TV62	QDLVDKL	1666	1673	1253	21.1909	2	415.734	829.453	-1.94608	13.07		False
Q9TV62	INTKKKLETDISQ	1726	1738	7999	11.7844	2	759.429	1516.84	-1.02722	25.07		False
Q9TV62	INTKKKLETDISQIQGEMED	1726	1745	3896	22.576	2	1160.59	2319.16	-0.714386	25.43		False
Q9TV62	IVQEARNAEEKAKKAITD	1746	1763	2509	16.7436	3	672.035	2013.08	-1.8415	51.5		True
Q9TV62	MAEELKKEQDTSAHL	1767	1781	1180	14.8455	3	577.285	1728.83	-1.56317	130.72		False
Q9TV62	MAEELKKEQDTSAHL	1767	1781	10745	14.8121	3	582.616	1744.83	-1.74431	23.43	[1] Oxidation (M)	False
Q9TV62	AEELKKEQDTSAHL	1768	1781	9598	12.1417	2	799.904	1597.79	-0.614662	80.86		False
Q9TV62	LKKEQDTSAHL	1771	1781	10582	10.152	2	635.343	1268.67	-0.973507	74.76		False
Q9TV62	LALKGGKKQIQKLE	1805	1818	11101	12.2099	2	777.49	1552.97	-0.742588	44.61		False
Q9TV62	LALKGGKKQIQKLEA	1805	1819	6301	12.8742	2	813.008	1624	-1.32027	25.01		False
Q9TV62	ALKGGKKQIQKLEA	1806	1819	10400	10.5817	2	756.466	1510.92	-1.38154	24.89		False
Q9TV62	RVRELENEVENEQKRNVE	1820	1837	5738	14.4829	3	757.386	2269.14	-1.78244	35.92		True
Q9TV62	LTYQTEEDRKNVLRL	1852	1866	6565	19.7386	4	470.257	1877	-0.643531	66.25		True
Q9TV62	QDLVDKLQSKVKA	1867	1879	8570	19.4629	4	368.717	1470.84	-1.75585	40.22		False
Q9TV62	QDLVDKLQSKVKAYKRQAEE	1867	1886	8492	21.287	5	476.063	2375.28	0.0101003	13.06		False
Q9TV62	VDKLQSKVKAYKRQAEE	1870	1886	7484	11.3854	4	505.784	2019.11	-2.78996	22.26		False
Q9TV62	AEEQSNVNLSKFRKLQHELE	1887	1906	9509	21.287	4	600.563	2398.22	-1.02468	33.79		False
Q9TV62	AEEQSNVNLSKFRKLQHELEE	1887	1907	3313	22.2225	4	632.824	2527.27	-0.293324	24.03		False
