# Supplementary figures and images for: Deciphering the protein digestion of meat products for the elderly by in vitro food oral processing and gastric dynamic digestion, peptidome analysis and modeling
Source: Royal Society of Chemistry journal article supplement (doi:10.1039/d1fo00969a), 2021-01-01

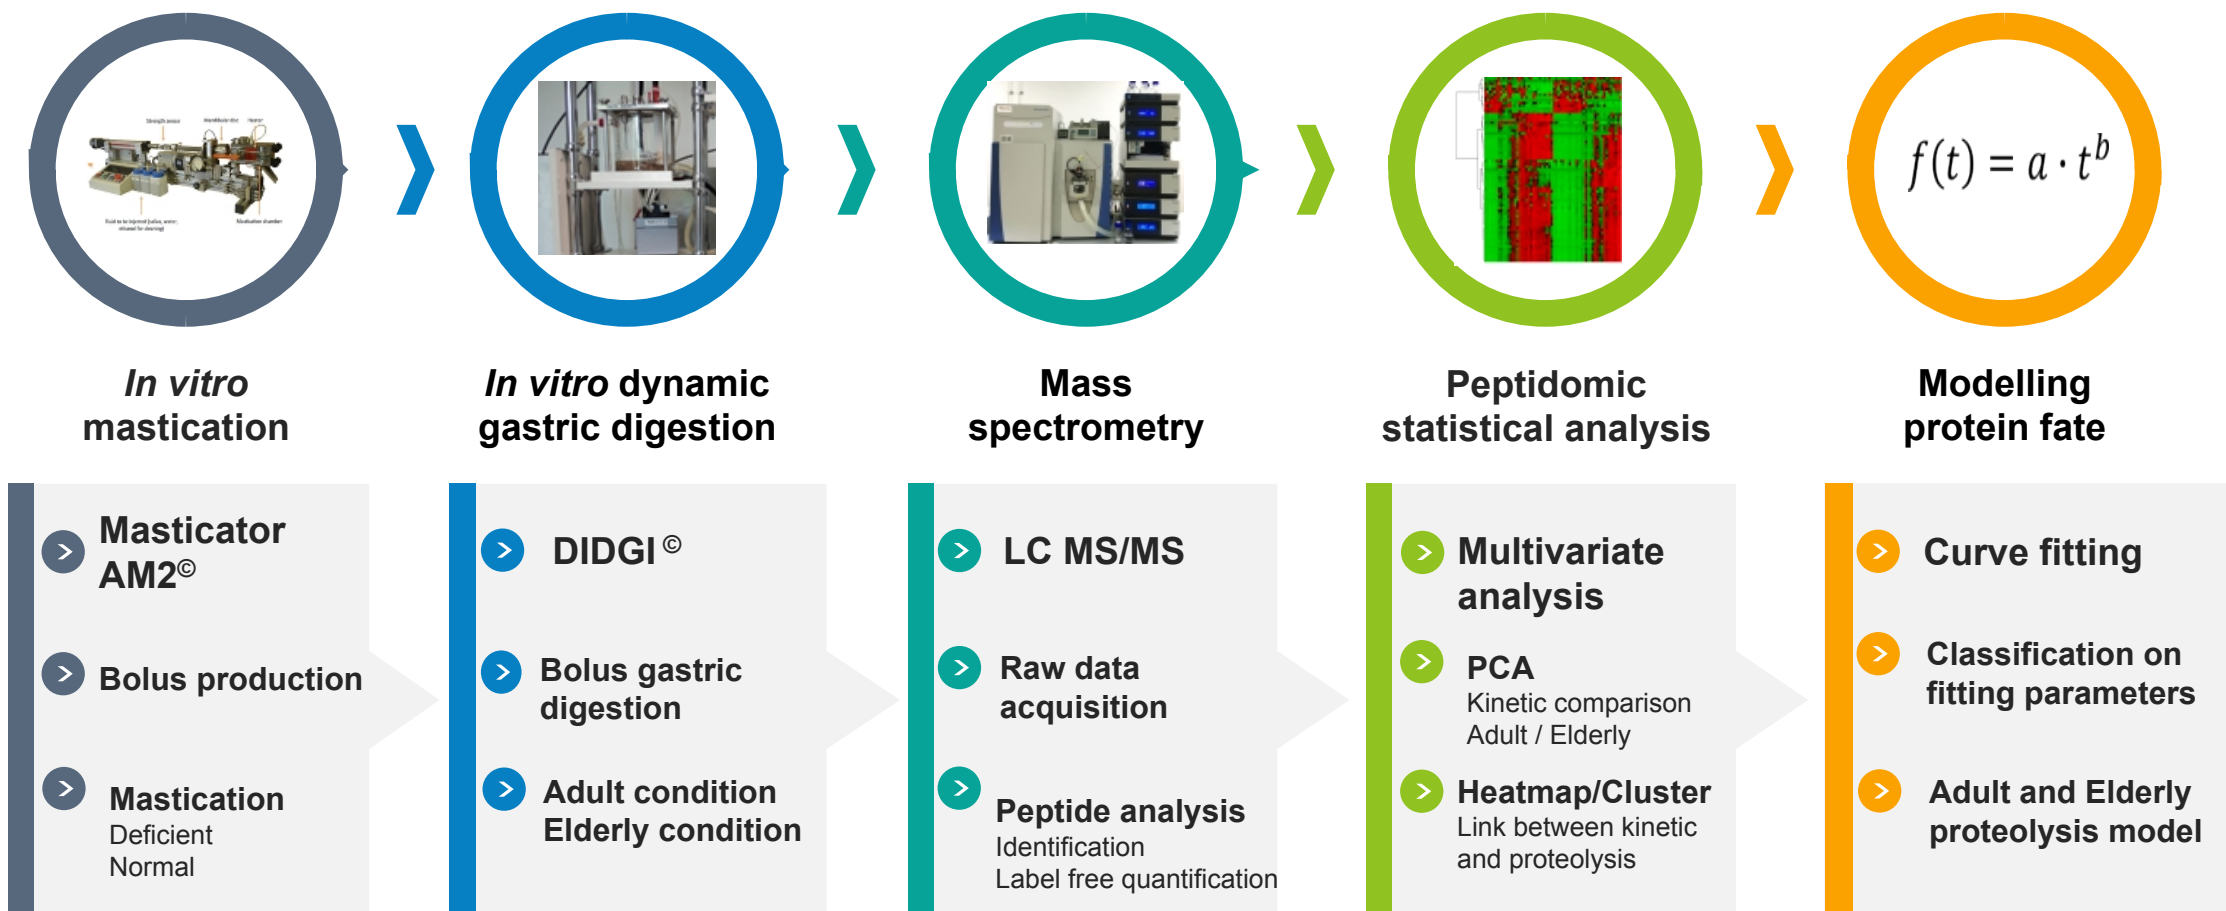

Supplement: d1fo00969a3.pdf [file d1fo00969a3.pdf]
